# Supplementary material for: Organised screening for cervical cancer in France: a cost-effectiveness assessment
Source: PubMed Central journal article supplement — BMJ Open. 2017 Oct 6;7(10):e014626. doi: 10.1136/bmjopen-2016-014626 (PMC5640017; doi:10.1136/bmjopen-2016-014626), 2017-10-06
Supplement: bmjopen-2016-014626.draft_revisions.pdf [file bmjopen-2016-014626.draft_revisions.pdf]

# BMJ Open

BMJ Open is committed to open peer review. As part of this commitment we make the peer review history of every article we publish publicly available.

When an article is published we post the peer reviewers' comments and the authors' responses online. We also post the versions of the paper that were used during peer review. These are the versions that the peer review comments apply to.

The versions of the paper that follow are the versions that were submitted during the peer review process. They are not the versions of record or the final published versions. They should not be cited or distributed as the published version of this manuscript.

BMJ Open is an open access journal and the full, final, typeset and author-corrected version of record of the manuscript is available on our site with no access controls, subscription charges or pay-per-view fees (<http://bmjopen.bmj.com>).

If you have any questions on BMJ Open's open peer review process please email [editorial.bmjopen@bmj.com](mailto:editorial.bmjopen@bmj.com)

# BMJ Open

## Organized screening for cervical cancer in France: a Cost-effectiveness assessment

|                                 |                                                                                                                                                                                                           |
|---------------------------------|-----------------------------------------------------------------------------------------------------------------------------------------------------------------------------------------------------------|
| Journal:                        | <i>BMJ Open</i>                                                                                                                                                                                           |
| Manuscript ID                   | bmjopen-2016-014626                                                                                                                                                                                       |
| Article Type:                   | Research                                                                                                                                                                                                  |
| Date Submitted by the Author:   | 17-Nov-2016                                                                                                                                                                                               |
| Complete List of Authors:       | Barré, Stéphanie; Institut National du Cancer, Dépistage<br>Masseti, Marc; Public Health Expertise,<br>Leleu, Henri; Public Health Expertise<br>De Bels, Frédéric; Institut National du Cancer, Dépistage |
| <b>Primary Subject Heading</b>: | Health economics                                                                                                                                                                                          |
| Secondary Subject Heading:      | Oncology, Public health, Diagnostics                                                                                                                                                                      |
| Keywords:                       | Health economics < HEALTH SERVICES ADMINISTRATION & MANAGEMENT, Gynaecological oncology < GYNAECOLOGY, PUBLIC HEALTH                                                                                      |
|                                 |                                                                                                                                                                                                           |

SCHOLARONE™  
Manuscripts

Peer Review Only

1  
2  
3  
4 1 Organized screening for cervical cancer in France: a Cost-  
5 effectiveness assessment  
6 2

7  
8 3 **Authors:**

9  
10 4 Barré Stéphanie<sup>1</sup>, Massetti M<sup>2</sup>, Leleu H<sup>2</sup>, De Bels F<sup>1</sup>

11  
12 5 1. French National Cancer Institute (INCa), 52 avenue André Morizet, Boulogne Billancourt Cedex,  
13 6 92513, France.

14  
15  
16 7 2. Public Health Expertise, 157 rue du faubourg Saint Antoine, Paris, 75011, France.

17  
18 8 **Corresponding author:**

19  
20 9 Barré Stéphanie, [sbarre@institutcancer.fr](mailto:sbarre@institutcancer.fr), +33 (0) 1 41 10 14 10

21  
22 10 **Word count: 3110**

23  
24  
25 **French National Cancer Institute**

26 The French National Cancer Institute was established under the Public Health Act of 9 August 2004  
27 as the government health and science agency specialised in cancer control. It is a Public Interest  
28 Grouping which brings together State representatives, charities, health insurance funds, hospital  
29 federations and research organisations. It is responsible for rolling out the 2014-2019 Cancer  
30 Control Plan and reports to the Ministries for Health and for Research.  
31

32 The Institute provides an integrated approach encompassing all cancer-control dimensions (health,  
33 scientific, social and economic) and areas of intervention (prevention, screening, care and  
34 research), for the benefit of patients and their relatives.  
35

36  
37  
38  
39  
40 [www.e-cancer.fr](http://www.e-cancer.fr)

41 11

42 12

43 13

## ABSTRACT

**OBJECTIVE:** Accordingly to the third Cancer plan, organized screening (OS) of cervical cancer (CC) among women aged 25-65 should be implemented in the forthcoming years in France. The most cost-effective way to implement OS in the French health care system in regard of this objective is yet to be determined.

**METHODS:** A microsimulation model was developed by the French National Institute of Cancer (INCa) alongside clinical experts and stakeholder representatives. A closed cohort of women eligible to CC screening and representative in terms of age and participation to individual screening (IndScr) was modelled on a lifetime horizon. Different OS strategies, additive to the existing IndScr and based on mailed invitations and recalls to perform OS with different screening tests (Pap, HPV, p16/Ki67) and OS periodicity were assessed. The analysis was conducted from the collective perspective.

**RESULTS:** Compared to the current situation, all OS strategies are associated with decreased cancer incidence/mortality (from -14.2%/-13.5% to -22.9%/-25.8%, respectively). Most strategies generate extra costs ranging from €37.9 to €1,607 per eligible woman. HPV-testing every 10 and 5 years are cost-saving.

HPV-test every 10 years is the less expensive, non-dominated strategy and represents the reference, being more effective and cost-saving than Pap-based strategies including the current situation. It is the dominating alternative, alongside HPV-test every 5 years. p16Ki67 as primary and HPV+ confirmation tests are more effective strategies with ICERs of €6,541,250 and €101,391 per life year, respectively. Pap-based strategies generate intermediary results.

**CONCLUSION:** OS strategies based on HPV-test appear highly efficient although those results rely on the assumption that OS periodicity will be respected. Implementing such OS modalities will require major adaptations to the current CC screening organization. Pap-test based strategies might constitute simpler modalities to set-up OS while preparing the field to secure appropriate implementation of other OS screening modalities.

1  
2  
3  
4  
5  
6  
7  
8  
9  
10  
11  
12  
13  
14  
15  
16  
17  
18  
19  
20  
21  
22  
23  
24  
25  
26  
27  
28  
29  
30  
31  
32  
33  
34  
35  
36  
37  
38  
39  
40  
41  
42  
43  
44  
45  
46  
47  
48  
49  
50  
51  
52  
53  
54  
55  
56  
57  
58  
59  
60

### Strengths and limitations of the study

- A microsimulation model was developed to assess the efficiency of various strategies of cervical cancer organized screening in France.
- The model operates individual women eligible to screening and representative of the current French population on a lifetime horizon.
- Real-life practices and data were used, allowing fine modelling of the screening processes and validation against observed French data.
- The lack of precision of transition probabilities in the context of low incidence of cervical cancer as well as the assumptions required to model screening practices after primary HPV-tests are the main limitations of the study.

For peer review only

## BACKGROUND

Cervical cancer (CC) is the second cancer for incidence and the first for mortality in women worldwide. CC natural history is related to persistent HPV infection of the cervix that lead to squamous intraepithelial lesions that can evolve into cancerous lesions. CC prevention is based on screening, to detect and remove lesions at early stages to prevent invasive cancer, and anti-HPV vaccination to reduce cancer-associated HPV infection.[1]

In France, CC prevention is based on individual voluntary screening (IndScr) of CC for women aged 25 to 65 and vaccination. IndScr is based on a Papanicolaou test (Pap-test) every 3 years, after two negative annual Pap-tests. About 90% of Pap-smears are done by gynaecologists, although general practitioners (GP) and midwives are authorized to perform it. IndScr has led to a significant decrease of its incidence and associated mortality in the last 20 years. In 2012, CC was the 11<sup>th</sup> most frequent and 12<sup>th</sup> most lethal form of cancer in women.[2] However many women still do not participate in CC screening. Participation to IndScr was found to be around 61% of eligible women, with low access to healthcare, comorbidities and poverty as risk factors for non-participation. Furthermore, vaccination has had a slow adoption in the French population.[3] In 2015, it was estimated that only 17% of women eligible to vaccination were vaccinated.[4] Thus, screening remains the main prevention tool to reduce CC. In 2014, the third French Cancer Plan has been launched to rise to both human and societal challenges issued by cancer. Indeed, its first operational objective is to implement CC OS among women aged 25-65 with a participation rate objective of 80% and a 30% reduction in CC-related mortality.[5]

Several OS experimentations have been performed in France to assess the efficacy of several modalities of screening including invitation and positive test follow-up, self-sampling and HPV-testing. The experimentations showed to improve participation by 13.2%, reduced lost to follow-up (LtFU) rate and demonstrated that primary HPV-testing and self-sampling are feasible alternative to Pap-smear in France.[6] Additionally, primary screening by HPV-testing has been evaluated as an alternative to Pap-smear.[7] Finally, innovative testing such as p16/Ki67 double-staining was shown to be a performant alternative for CC screening compared to HPV or Pap-test.[8]

Consequently, many alternative strategies can be considered for the implementation of OS for CC in France. In this context, a medico-economic evaluation of several OS strategies was performed by the French national cancer institute (INCa) which relied on a scientific steering committee involving clinical experts and stakeholder representatives (social security, ministry of health, patients and professionals) to provide advice on methodological choices and best OS implementation modality in the French context.

## METHODS

Seven strategies were compared to the current IndScr-only situation (Table 1). These strategies were all based on adding to the current IndScr layer an invitation to be screened followed by one recall for woman who did not spontaneously participate in the last 3 years (non-participant). The strategies also included an improvement in follow-up resulting in a reduction in LtFU women. Different screening tests were considered for primary screening or confirmation after a positive primary test, including Pap-test (analysed with liquid-based or regular cytology), HPV DNA detection and p16/Ki67 double-staining. Women tested positive for both primary and confirmation tests went through colposcopy and conisation if a high grade (grade 2 or worse [CIN2+]) cervical intraepithelial neoplasia (CIN) lesion was identified. Women with CIN1 were retested at 12, 18 and 24 months if the initial lesion was ASC-US or LSIL on Pap, or went through colposcopy. Women tested positive for primary and negative for confirmation were retested at one year. A small fraction of participant was LtFU. Women could only be invited once per cycle. Detailed algorithms are available as supplementary material.

The population was limited to woman aged 25-65 currently eligible to IndScr.

Table 1 Strategies compared

| Strategy         | IR + Improved Follow-up | Primary test       | Confirmation test after positive primary test |
|------------------|-------------------------|--------------------|-----------------------------------------------|
| Current          | No                      | Pap-test / 3 years | Pap-test or HPV                               |
| Pap/Pap-HPV      | Yes                     | Pap-test / 3 years | Pap-test                                      |
| Pap/p16Ki67      | Yes                     | Pap-test / 3 years | p16/Ki67                                      |
| HPV/Pap-5y†      | Yes                     | HPV / 5 years      | Pap-test                                      |
| HPV/Pap-3y†      | Yes                     | HPV / 3 years      | Pap-test                                      |
| HPV/Pap-10y†     | Yes                     | HPV / 10 years     | Pap-test                                      |
| HPV/p16Ki67-5y†  | Yes                     | HPV / 5 years      | p16/Ki67                                      |
| HPV/p16Ki67-10y† | Yes                     | HPV / 10 years     | p16/Ki67                                      |
| p16Ki67/p16Ki67  | Yes                     | HPV / 3 years      | p16/Ki67                                      |

IR: invitation + recall for woman who did not participate in IndScr in the last 3 years (non-participant)

† : women 25-35 are not eligible to HPV screening and receive a Pap-test every 3y instead. Woman tested HPV+/confirmation- go through double testing (HPV + Pap) the following year.

### model structure

Given the complexity of screening algorithms (different testing/retesting frequencies) and interactions between participation rates and individual characteristics (age, social), a Markov state microsimulation model was developed. Considering the relatively slow progression of intraepithelial lesions and that the benefits of screening are usually seen on the long term, a 1-year cycle-length was used. The model was adapted from a previously published Markov cohort-based model.[9] A cohort of 100,000 women was simulated. Due to the long term development of the disease and its consequences, a lifetime horizon was applied.

For each woman entering the model, age, IndScr participation and periodicity, health state (HPV-, HPV+, CIN lesions or cancer) and vaccination are randomly attributed at the simulation initiation. At each cycle, non-HPV-infected women can become infected with a risk depending on age and vaccination status. The infection can progress to CIN1 and subsequently to CIN2/3 and FIGO (Federation of Gynecology and Obstetrics) 1 non-invasive cancer. HPV infection and CIN lesions can regress spontaneously until CIN2/3 lesions have become persistent (pCIN2/3). Patients then systematically progress to cancer with an age-dependant rate. FIGO1 lesions can progress to FIGO2, 3 and 4 and become symptomatic. Once symptomatic, the lesion is treated and the woman remains in

1 the corresponding treated state with an associated cancer mortality rate. Age-specific general  
2 mortality applies at any state.

3 Each year, the model determines whether the simulated woman undergoes screening either  
4 spontaneously (IndScr) or after invitation based on her participation periodicity, time since last  
5 screening and participation rates after invitation/recall. Simulated results for screening included  
6 positivity and lesion type for Pap-tests and positivity for HPV and p16Ki67 testing. Positivity was  
7 based on tests' specific sensitivity and specificity and woman's current state. Screening affects the  
8 natural progression of the disease: women with non-cancerous lesions return to HPV- state after  
9 conisation, undiagnosed cancerous lesions are treated. Structure of the modelled natural history is  
10 presented in Figure 1.

### 11 **input data**

12 The input data used in the simulation is presented in table 2.

13 Population characteristics were based on available epidemiologic and demographic data  
14 representative of the French population. Vaccination was limited to women aged 30 or less as it was  
15 only recently available in France. IndScr participation periodicity depended on age and social status  
16 and was obtained from the analysis of the national health insurance database (Supplementary data).  
17 About 61.9 % of eligible women were found to participate in IndScr at a  $\leq 4$  years frequency.[3]  
18 Distribution of each modelled health state by age was not available in France and was estimated by  
19 simulating a cohort of non-vaccinated 14 years old women undergoing current IndScr-only screening  
20 over life-time.

21 Transition probabilities (TP) were based on a previously published model.[9] HPV infection rates and  
22 pCIN2/3 to cancer progression rate were calibrated using the model to reproduce observed HPV and  
23 cancer prevalence by age.[1, 10] High risk HPV annual infection rate was estimated to be 3.5% to  
24 14%, depending on age.[11] The impact of vaccination is simulated by applying a relative risk  
25 reduction of infection.[1]

26 Probabilities of cancer progression and symptoms emergence were obtained from the CC natural  
27 history simulation model developed by Myers *et al.*[12] Cancer specific-mortality by grade and time  
28 since diagnosis was estimated from SEER using data for white women under 50 as it was assumed  
29 that non-specific mortality was low in this group.[13] General mortality is modelled accordingly to  
30 French national statistics office (INSEE) data.

31 Participation rates after invitation and recall, LtFU rate in the current screening, OS impact on LtFU  
32 rate, observed lesions on Pap-smear and associated care were all based on observational data from  
33 French OS experimentations.[1]

34 Screening tests' sensitivity and specificity were based on clinical studies for detecting CIN2/3 lesions  
35 and took into account the test sequence (eg. HPV after Pap or primary HPV).[8, 14-16] One percent  
36 of Pap-tests were non-interpretable and led to retest.[17] Colposcopy was assumed to have 100%  
37 sensitivity and specificity. A 95% efficacy was considered for conisation.

38 The model estimated OS and direct medical costs from a collective perspective. OS costs covered  
39 invitations, recall as well as database management related to invitations dispatch, women's  
40 participation tracking and follow-up management. All costs were obtained or updated to 2016€ using  
41 consumer price index. Cost data for consultations and medical care are based on national tariffs. It  
42 was considered that women participating in IndScr do so during a routine follow-up consultation,  
43 with no extra-consultation cost. Cost for HPV-analysis was decreased by 60% in strategies with



1 primary HPV-testing, assuming a substantial cost reduction in case of wide generalization of HPV-  
 2 testing. This assumption was validated by health insurance and health ministry representatives.  
 3 Accordingly to public-health law, no extra co-payment is applied to OS participants. Cancer states  
 4 were associated with costs accounting for care and follow-up by FIGO stage [11] when entering the  
 5 corresponding diagnosed state. All costs were updated to 2016, using national consumer price index  
 6 for healthcare goods and services.

7 *Table 2 Input data*

| Parameter                              | Value                                              | Distribution | Source                                                                                                                                                   |
|----------------------------------------|----------------------------------------------------|--------------|----------------------------------------------------------------------------------------------------------------------------------------------------------|
| <b>Demographic</b>                     |                                                    |              |                                                                                                                                                          |
| Age                                    | 25 - 65<br>Based on distribution                   | NA           | National Statistics (INSEE)                                                                                                                              |
| CMU-c Eligibility (social status)      | 12.2 % (9.8% - 14.6%)                              | Normal       | National Health Insurance Data                                                                                                                           |
| IndScr participation periodicity       | Based on frequency<br>distribution, age and social | Uniform      | National Health Insurance Data                                                                                                                           |
| Initial Health State                   | Based on distribution                              | NA           | Based on model prediction for a cohort of<br>14-years women                                                                                              |
| <b>Transition probabilities</b>        |                                                    |              |                                                                                                                                                          |
| HR-HPV infection                       | 0.03 – 0.15 (0.03 – 0.18)<br>Based on distribution | Beta         | Estimated to reproduce known<br>prevalence by age [11]                                                                                                   |
| HPV-infection regression               | 0.50 (0.40 – 0.60)                                 | Beta         | Riethmuller et al. (1999)[18], Clavel et al.<br>(2001)[19], Boulanger et al.<br>(2004)[20], Beby-Defaux et al. (2004)[21],<br>Dalstein et al. (2004)[22] |
| HR-HPV Infection → CIN 1               | 0.05 (0.04 – 0.06)                                 | Beta         | Moscicki et coll. (2001)[23]                                                                                                                             |
| CIN1 Regression                        | 0.50 (0.40 – 0.60)                                 | Beta         | Melnikow et coll. (1998)[24], Nobbenhuis<br>et coll. (2001)[25], Sanders and Taira<br>(2003)[26], Van De Velde et coll.<br>(2007)[27]                    |
| CIN1 → CIN 2/3                         | 0.12 (0.10 – 0.14)                                 | Beta         | Melnikow et coll. (1998)[24], Sanders and<br>Taira (2003)[26], Van De Velde et coll.<br>(2007)[27]                                                       |
| CIN2/3 Regression                      | 0.28 (0.22 – 0.33)                                 | Beta         | Melnikow et coll. (1998)[24]                                                                                                                             |
| CIN2/3 → pCIN 2/3                      | 0.13 (0.10 – 0.15)                                 | Beta         | Melnikow et coll. (1998)[24]                                                                                                                             |
| Persistent CIN 2/3 → FIGO I            | 0.01 – 0.05 (0.01 – 0.06)<br>Based on distribution | Beta         | Estimated to reproduce known<br>prevalence by age[1, 10]                                                                                                 |
| FIGO I → FIGO II                       | 0.20 (0.16 – 0.24)                                 | Beta         | Myers <i>et al.</i> 2000[12]                                                                                                                             |
| FIGO II → FIGO III                     | 0.26 (0.21 – 0.31)                                 | Beta         | Myers <i>et al.</i> 2000[12]                                                                                                                             |
| FIGO III → FIGO IV                     | 0.36 (0.29 – 0.43)                                 | Beta         | Myers <i>et al.</i> 2000[12]                                                                                                                             |
| FIGO I → Symptomatic FIGO I            | 0.15 (0.12 – 0.18)                                 | Beta         | Myers <i>et al.</i> 2000[12]                                                                                                                             |
| FIGO II → Symptomatic FIGO II          | 0.23 (0.18 – 0.27)                                 | Beta         | Myers <i>et al.</i> 2000[12]                                                                                                                             |
| FIGO III → Symptomatic FIGO III        | 0.60 (0.48 – 0.71)                                 | Beta         | Myers <i>et al.</i> 2000[12]                                                                                                                             |
| FIGO VI → Symptomatic FIGO IV          | 0.90 (0.67 - 1.00)                                 | Beta         | Myers <i>et al.</i> 2000[12]                                                                                                                             |
| 1-year Cancer Survival                 | 0.43 – 0.98 (0.23 – 0.99)<br>By stage              | Beta         | SEER[13]                                                                                                                                                 |
| 5-year Cancer Survival                 | 0.14 – 0.94 (0.06 – 0.97)<br>By stage              | Beta         | SEER[13]                                                                                                                                                 |
| 10-year Cancer Survival                | 0.05 – 0.93 (0.01 – 0.96)<br>By stage              | Beta         | SEER[13]                                                                                                                                                 |
| <b>Screening</b>                       |                                                    |              |                                                                                                                                                          |
| Participation after invitation         | 17.3% (10.0% - 24.0%)                              | Uniform      | Duport <i>et al.</i> 2014[17]                                                                                                                            |
| Participation after recall             | 12.1% (5.0% - 18.0%)                               | Uniform      | Duport <i>et al.</i> 2014[17]                                                                                                                            |
| Lost to follow-up with IndScr          | Based on lesion on Pap.<br>Average 27.7%           | NA           | Duport <i>et al.</i> 2014[17]                                                                                                                            |
| Reduction in lost to follow-up with OS | 0.77 (0.08 – 0.77)                                 | Uniform      | OS experimentations, INCA personal<br>communication                                                                                                      |
| Lesions on PAP                         | Distribution                                       | NA           | Duport <i>et al.</i> 2014[17]                                                                                                                            |
| Care per lesions                       | Distribution                                       | NA           | Duport <i>et al.</i> 2014[17]                                                                                                                            |

|                                           |                                |         |                                                                                   |
|-------------------------------------------|--------------------------------|---------|-----------------------------------------------------------------------------------|
| Primary Pap-test (Se)                     | 70.0 % (57.0 % - 80.0 %)       | Beta    | Mustafa <i>et al.</i> (2015)[14]                                                  |
| Confirmation Pap-test after HPV+ (Se)     | 85.9 % (76.6 % - 92.1 %)       | Beta    | Bergeron <i>et al.</i> (2015)[8]                                                  |
| Primary HPV-test (Se)                     | 94.0 % (89.0 % - 97.0 %)       | Beta    | Mustafa <i>et al.</i> (2015)[14]                                                  |
| Confirmation HPV-test after Pap+ (Se)     | 100.0 % (NR)                   | NA      | Mayrand <i>et al.</i> (2007)[16]                                                  |
| p16/Ki67 (Se)                             | 86.7 % (81.1 % - 90.9 %)       | Beta    | Ikenberg <i>et al.</i> (2013)[15]                                                 |
| Colposcopy (Se)                           | 100.0% (NA)                    | NA      | Assumption                                                                        |
| Primary Pap-test (Sp)                     | 95.0 % (92.0 % - 97.0 %)       | Beta    | Mustafa <i>et al.</i> (2015)[14]                                                  |
| Confirmation Pap-test after HPV+ (Sp)     | 65.9 % (63.1 % - 68.6 %)       | Beta    | Bergeron <i>et al.</i> (2015)[8]                                                  |
| Primary HPV-test (Sp)                     | 90.0 % (86.0 % - 93.0 %)       | Beta    | Mustafa <i>et al.</i> (2015)[14]                                                  |
| Confirmation HPV-test after Pap+ (Sp)     | 61.1 % (NR)                    | NA      | Mayrand <i>et al.</i> (2007)[16]                                                  |
| p16/Ki67 (Sp)                             | 95.2 % (94.9 % - 95.4 %)       | Beta    | Ikenberg <i>et al.</i> (2013)[15]                                                 |
| Colposcopy (Sp)                           | 100.0% (NA)                    | NA      | Assumption                                                                        |
| Conisation efficacy                       | 95.0%                          | NA      | Assumption                                                                        |
| Non-interpretable tests                   | 1.0% (1.0% - 3.0%)             | Uniform | Duport <i>et al.</i> 2014[17]                                                     |
| <b>Costs (€)</b>                          |                                |         |                                                                                   |
| Pap-test (IndScr)                         | 47.78 (38.88 – 57.59)          | Gamma   | National tarrifs                                                                  |
| Pap-test (OS)                             | 49.62 (40.37 – 59.81)          | Gamma   | National tarrifs                                                                  |
| p16/Ki67 (IndScr)                         | 86.77 (70.60 - 104.58)         | Gamma   | National tarrifs                                                                  |
| p16/Ki67 (OS)                             | 88.61 (72.09 - 106.80)         | Gamma   | National tarrifs                                                                  |
| HPV-test (IndScr)                         | 47.70 (75.48 - 97.17)          | Gamma   | National tarrifs                                                                  |
| HPV-test (OS)                             | 49.54 (49.54 - 71.24)          | Gamma   | National tarrifs                                                                  |
| Confirmation Pap-test (IndScr)            | 78.17 (63.60 - 94.21)          | Gamma   | National tarrifs                                                                  |
| Confirmation Pap-test (OS)                | 49.63 (40.38 - 59.82)          | Gamma   | National tarrifs                                                                  |
| Confirmation p16/Ki67 (IndScr)            | 116.77 (78.09 - 99.57)         | Gamma   | National tarrifs                                                                  |
| Confirmation p16/Ki67 (OS)                | 88.23 (71.79 - 106.34)         | Gamma   | National tarrifs                                                                  |
| Confirmation HPV-test (IndScr)            | 78.09 (63.53 - 94.12)          | Gamma   | National tarrifs                                                                  |
| Confirmation HPV-test (OS)                | 49.55 (49.55 - 71.03)          | Gamma   | National tarrifs                                                                  |
| Colposcopy                                | 49.82 (40.54 - 60.05)          | Gamma   | National tarrifs                                                                  |
| Conization                                | 93.42 (76.01 - 112.60)         | Gamma   | National tarrifs                                                                  |
| FIGO I CC treatment                       | 1041.95 (847.77 - 1255.85)     | Gamma   | Dervaux <i>et al.</i> 2007[11]                                                    |
| FIGO II CC treatment                      | 1818.86 (1479.90 - 2192.25)    | Gamma   | Dervaux <i>et al.</i> 2007[11]                                                    |
| FIGO III CC treatment                     | 25817.84 (21006.43 - 31117.97) | Gamma   | Dervaux <i>et al.</i> 2007[11]                                                    |
| FIGO IV CC treatment                      | 30582.83 (24883.41 - 36861.16) | Gamma   | Dervaux <i>et al.</i> 2007[11]                                                    |
| Database management + Invitation dispatch | 7.00 (4.00 – 11.00)            | Gamma   | Cost of invitation to colorectal OS (Heath Ministry data, personal communication) |
| Recall dispatch                           | 0.40 (0.40 – 3.25)             | Gamma   | 50% postal charges                                                                |

1

1  
2  
3 **1 validation**

4 2 Model results were compared to observed epidemiological data for validation. The model faithfully  
5 3 reproduces cancer incidence and CC mortality in France.[11] Results of model validation are available  
6 4 as supplementary material.

8 **5 analyses**

9 6 Incremental cost–effectiveness ratios (ICER) were calculated for the life expectancy (QALE). Costs and  
10 7 QALE were discounted at 4% per year, according to existing French guidelines for cost-effectiveness  
11 8 studies.[28]

13 9 Several alternative scenarios were tested, including: not taking into account the efficacy of OS on  
14 10 LtFU rate, not taking into account a reduction in HPV cost, taking into account a 60% reduction in  
15 11 p16Ki67 cost.

17 12 The robustness of the model was tested using deterministic sensitivity analysis (DSA). In the DSA, all  
18 13 the parameters were tested at their confidence intervals (or at  $\pm 20\%$  of baseline value when not  
19 14 available). The ten parameters with the greatest influence on the results are presented with tornado  
20 15 graphs for costs and health outcomes.

## RESULTS

Compared with the current situation, invitation and recall led to an increase in the 4-years participation rate from 61.9% to 65.5%. Every tested strategies was also associated with a reduction in cancer incidence/mortality ranging from -14.2%/-13.5% for the Pap/Pap strategy to -22.9%/-25.8% for the HPV/p16Ki67-5y strategy.

Undiscounted results are presented in table 3.

Table 3 Undiscounted results

| Scénario        | Outcomes |                  | Costs (€) per woman |           |                       |         |
|-----------------|----------|------------------|---------------------|-----------|-----------------------|---------|
|                 | Cancer   | Cancer mortality | OS organisation     | Screening | CC care & conizations | Total   |
| IndScr only*    | 34       | 13               | 0                   | 294.2     | 30.9                  | 325.0   |
| Pap/Pap-HPV     | -14.2%   | -13.5%           | +19.57              | +13.32    | -3.92                 | +28.97  |
| Pap/p16Ki67     | -16.6%   | -15.9%           | +19.57              | +18.46    | -4.57                 | +33.46  |
| HPV/Pap-5y      | -18.9%   | -22.5%           | +15.12              | -29.79    | -7.24                 | -21.91  |
| HPV/Pap-3y      | -21.1%   | -22.4%           | +15.16              | +99.87    | -7.31                 | +107.73 |
| HPV/Pap-10y     | -8.0%    | -13.6%           | +14.94              | -14.42    | -0.48                 | -134.04 |
| HPV/p16Ki67-5y  | -22.9%   | -25.8%           | +15.10              | +1.57     | -0.81                 | +8.55   |
| HPV/p16Ki67-10y | -11.9%   | -17.0%           | +14.93              | -129.7    | -5.87                 | -120.63 |
| p16Ki67/p16Ki67 | -24.3%   | -24.4%           | +19.57              | +233.30   | -6.87                 | +246.00 |

\*Reference for other scenarios. Cumulated incidence and mortality for 10,000 women eligible to OS on a lifetime horizon.

Average undiscounted cost of screening for the current eligible French population over lifetime was estimated to be €325 per eligible woman, most of which resulted from screening (€294). Strategies based on HPV-testing with 5 and 10-years frequencies were cost-saving (-€22 and -134 per woman, respectively) despite the additional cost incurred by the OS (€15). Other strategies were responsible of an increased cost ranging from €29 to €33 for Pap based screening to €108 to €246 for HPV/Pap-3y and p16Ki67/p16Ki67.

Although it was the cheapest strategy (€191 per eligible woman), HPV/Pap-10y was the strategy with the smallest cancer reduction (-11.9%), as opposed to p16Ki67/p16Ki67 that led to a 25% reduction in CC with the highest cost (€571 per eligible woman). Figure 2 presents the mean cost per woman and cancer reduction rate for each strategy.

Discounted survival is consistent with incidence and mortality (table 4). Compared to the current situation (19.4 LY survival), included strategies led to increased survival ranging from 10 years/10,000 eligible women for the Pap/Pap and HPV/Pap-10y strategies to 18 years for HPV/p16Ki67 and p16Ki67/ p16Ki67 strategies. Discounted extra costs per 10,000 eligible women ranged from €38K (HPV/Pap-5y confirmation test) to €1,608K (p16Ki67/p16Ki67). HPV-test every 5 and 10 years remained cost-saving after discounting. Thus, those strategies were more effective and cost-saving than Pap-based strategies, including current situation, and were the dominating alternatives. HPV/p16Ki67-5y and p16Ki67/p16Ki67 were more effective than HPV-test every 5 and 10 years and were associated with ICERs of €101,391 and €6,541,250 per LY respectively. HPV/Pap-3y was a dominated alternative, being as effective as HPV/Pap-5y and less effective than HPV/p16Ki67-5y at a much higher cost.

1 Table 4 Discounted results

| Scénario        | Survival (LY) | Total cost (K€) | ICER (€/LY) vs current | Frontier       |
|-----------------|---------------|-----------------|------------------------|----------------|
| IndScr only*    | 19.4          | 122.6           | Reference              | Dominated      |
| Pap/Pap-HPV     | +10.04        | +22.3           | 22,234                 | Dominated      |
| Pap/p16Ki67     | +11.68        | +25.5           | 21,918                 | Dominated      |
| HPV/Pap-5y      | +15.89        | -13.3           | Dominant               | Ext. Dominated |
| HPV/Pap-3y      | +15.93        | +55.8           | 35,095                 | Dominated      |
| HPV/Pap-10y     | +10.51        | -73.4           | Dominant               | Reference      |
| HPV/p16Ki67-5y  | +18.13        | +3.79           | 2,091                  | 101,389        |
| HPV/p16Ki67-10y | +13.00        | -64.6           | Dominant               | 35,846         |
| p16Ki67/p16Ki67 | +18.37        | +160.7          | 87,546                 | 6,592,441      |

2 \*Reference for other scenarios. Extra-survival per 10,000 women eligible to OS on a lifetime horizon. LY: Life Years

### 3 sensitivity and scenario analyses

4 Deterministic sensitivity analysis and scenario results of HPV/Pap-10y versus current situation for LY  
5 and costs are shown in tables 5 and 6, respectively.

6 Table 5 Results of DSA and scenario analyses with the biggest impact on survival for organised screening by invitation and  
7 recall of non-participant eligible women to perform a HPV-test every 10 years (Pap-test confirmation) versus current  
8 situation

| Parameter             | Variation of LY |             | Variation of cost (€) |             |
|-----------------------|-----------------|-------------|-----------------------|-------------|
|                       | Lower bound     | Upper bound | Lower bound           | Upper bound |
| Discounting           | 19.0431         | -5.2955     | 512.0                 | -237.34     |
| Age                   | 2.3455          | -2.2651     | 298.3                 | -525.3      |
| TP pCIN2/3 → FIGOI    | 0.0013          | -0.0024     | 0.0                   | -0.03       |
| 1-year survival FIGOI | -0.0015         | 0.0020      | 0.0                   | 0.0         |
| Pap-test sensitivity  | -0.0005         | 0.0014      | -0.1                  | 0.11        |
| TP CIN1 → HPV-        | -0.0010         | 0.0007      | -0.2                  | 0.15        |
| TP CIN1 → CIN2/3      | -0.0008         | -0.0004     | 0.1                   | -0.14       |
| TP HPV+ → CIN1        | 0.0005          | -0.0005     | -0.1                  | 0.22        |
| TP HPV+ → HPV-        | 0.0004          | -0.0004     | -0.2                  | 0.23        |
| TP FIGOI → FIGOII     | -0.0003         | 0.0005      | 0.1                   | -0.1        |

9  
10 Table 6 Results of DSA and scenario analyses with the biggest impact on costs for organised screening by invitation and  
11 recall of non-participant eligible women to perform a HPV-test every 10 years (Pap-test confirmation) versus current  
12 situation

| Parameter                 | Variation of LY |             | Variation of cost (€) |             |
|---------------------------|-----------------|-------------|-----------------------|-------------|
|                           | Lower bound     | Upper bound | Lower bound           | Upper bound |
| Age                       | 2.3455          | -2.2651     | 298.3                 | -525.3      |
| Discounting               | 19.0431         | -5.2955     | 512.0                 | -237.34     |
| Cost treatment FIGOI      | 0.0             | 0.000       | -193.9                | 213.57      |
| Cost primary Pap-test     | 0.0             | 0.0000      | -32.6                 | 35.96       |
| CMU-c beneficiaries rate  | 0.0001          | 0.0001      | 18.4                  | 18.36       |
| Pap-test specificity      | -0.0010         | 0.0007      | -0.2                  | 0.15        |
| Non-readable Pap-tests    | -0.0008         | -0.0004     | 0.1                   | -0.14       |
| Cost confirmation Pap     | 0.0005          | -0.0005     | -0.1                  | 0.22        |
| Probability yearly IndScr | 0.0004          | -0.0004     | -0.2                  | 0.23        |
| Cost colposcopy           | -0.0003         | 0.0005      | 0.1                   | -0.1        |

13 The parameters with the biggest impact were cost of testing (HPV and Pap) and impact of OS on LtFU  
14 rate after a positive result. However, HPV/Pap-10y systematically remained the most cost-effective  
15 alternative. Age at cohort generation led to drastic impact on results, despite HPV screening being  
16 less beneficial in both women <30 and >50 than in the rest of the eligible population. Vaccination  
17 rates (up to 80%) had a negligible impact. Similar results were seen for HPV/Pap-5y and

1 HPV/p16Ki67-5y. Not taking into account the efficacy of OS on LtFU rate did not change the  
2 conclusion although it significantly reduced the LY gains vs. current situation. Similarly not taking into  
3 account a reduction in HPV-testing cost led to similar conclusions: HPV/Pap-10y and HPV/Pap-5y  
4 remaining less costly than alternative strategies. Finally, 60% reduction in p16Ki67 cost led to a  
5 decreased total cost of €41.05 (-75%) for the p16Ki67/p16Ki67 scenario.

## 6 DISCUSSION

7 Using a comprehensive, validated microsimulation model, we showed that regardless of the  
8 modality, implementing an OS program for cervical cancer in France leads to an overall improvement  
9 in the screening rate and a reduction of CC incidence and mortality. Reducing LtFU rates and  
10 improving screening rates with invitations/recall as with the Pap/Pap scenario is a cost-effective  
11 strategy compared to current practices with an associated ICER of €22,231 per LY and an average  
12 gain of 10 LY per 10,000 eligible women.

13 Switching primary screening Pap-test to HPV-testing led to similar LY gains for the 10 years  
14 frequency. The 5-year frequency had yet better LY gains (15.89 vs. 10.51 per 10,000 eligible women).  
15 Furthermore, reducing the frequency of primary testing was cost-saving, even at the current cost of  
16 HPV-testing. Despite the longer interval between two screenings, HPV-test strategies remained  
17 effective because of their superior sensitivity vs. Pap-test.

18 Because of its very good sensitivity and specificity, introducing p16/Ki67 double-staining as the  
19 primary screening test yielded significant survival gains compared to current situation and HPV-  
20 testing (+18.37 and +2.48 per 10,000 eligible women, respectively). However, its very high price  
21 made it inefficient with an ICER of €6,592,441/LY.

22 Switching Pap-test for p16/Ki67 double-staining as confirmation test after positive Pap and HPV  
23 primary testing increased efficacy with moderate extra-cost. For HPV every 10 years, LY gains  
24 increased from +10.51 to +13.0 and costs from -€734,000 to -€646,000 per 10,000 eligible women.  
25 Thus, the HPV/p16Ki67-10y scenario was associated with an ICER of €35,846/LY.

26 These results were obtained with a microsimulation model that allows fine modelling of CC natural  
27 history and screening modalities. Additionally, many inputs were based on observed “real-life” data  
28 instead of simple screening guidelines. This enables us to faithfully simulate women’s screening  
29 behaviour by taking into account that many women do not strictly follow the screening interval  
30 leading to efficiency loss for the current situation, and that women have a tendency to quit screening  
31 with age.[3] This also enables us to integrate current professional practices that significantly diverge  
32 from recommended screening algorithms: in the current screening context, after a positive Pap-test,  
33 not all women proceed to confirmation (Pap or HPV-test) as some directly perform colposcopy or  
34 conisation, depending on the initially identified lesion. This has a significant impact on the efficiency  
35 of screening. Finally, our model allowed to incorporate LtFU rates which proved to be a key factor in  
36 screening efficacy, particularly when screening frequency is superior to 5 years.[17]

37 The model’s main limitations come from the estimation of the TP. An initial literature review showed  
38 important variations between sources with some TP not available. Additionally, the precision of their  
39 estimation were usually not sufficient enough given the low incidence of lesions in the general  
40 women population (1 in 10,000). Thus, we favoured sources that were previously used in French  
41 models to allow comparability with previously published results.[9, 11] Additionally, we calibrated  
42 the model on available prevalence data for France and externally validated the model. Furthermore,  
43 the sensitivity analyses showed that despite the uncertainty, TP had a limited impact on the results  
44 reinforcing our confidence in the ICER estimations. Finally, our results are comparable to previously

1  
2  
3  
4  
5  
6  
7  
8  
9  
10  
11  
12  
13  
14  
15  
16  
17  
18  
19  
20  
21  
22  
23  
24  
25  
26  
27  
28  
29  
30  
31  
32  
33  
34  
35  
36  
37  
38  
39  
40  
41  
42  
43  
44  
45  
46  
47  
48  
49  
50  
51  
52  
53  
54  
55  
56  
57  
58  
59  
60

1 published European studies: Accetta *et al.* have found HPV-test every 5 years to be a dominant  
2 strategy over triennial Pap-tests in Italy.[29] The decreased efficiency of HPV-test based CC screening  
3 with smaller frequencies was shown by Berkhof *et al.* in the Netherlands.[30] In Norway, Burger *et al.*  
4 found results comparable to the Pap/Pap-HPV scenario.[31]

5 Our results showed that the HPV/Pap-10y was the most efficient strategy with HPV/p16Ki67-10y  
6 being a cost-effective alternative. However, the final modality choice for OS-implementation will  
7 need to take into consideration several factors. First, the HPV/Pap-10y strategy, albeit the most  
8 efficient, is the less effective alternative on cancer incidence and prevalence, conflicting with the  
9 primary aim of the Cancer Plan to further reduce CC burden in France [5], potentially leading to  
10 consider the HPV/Pap-5y as a more suitable cost-saving modality. Second, current screening  
11 behaviour in France results in an over-participation with numerous women undergoing a Pap-test at  
12 a higher frequency than recommended. This phenomenon is likely to be related to the yearly  
13 recommended consultation with a gynaecologist. Our results showed that going from a 5-year  
14 frequency to 3 years implies a huge increase in screening cost (from -€133,000 to +€558,000 per  
15 10,000 eligible women) for a very small increase in survival (from 15.89 to 15.93). Indeed, HPV-  
16 testing is sensitive but has a low specificity and cervical lesions evolution is slow, with a majority  
17 regressing spontaneously. Women's over-participation will thus be a challenge to HPV-based testing  
18 if it is implemented and needs to be address beforehand, or an apparent efficient strategy will turn  
19 into a poorly efficient one with a high number of false-positive leading to unnecessary, potentially  
20 harmful testing. Third, HPV-testing is not recommended for women under 35, making it necessary to  
21 maintain a complex double screening system. Fourth, current screening organization in France is  
22 based on Pap-test which implies a different infrastructure. Switching to HPV will require to negotiate  
23 HPV tariffs, to develop quality control to ensure similar sensitivity than found during clinical studies  
24 and to develop the required infrastructure and equipment. Thus, although primary HPV-testing  
25 appears more cost-effective, many challenges will need to be addressed before it can be  
26 implemented. In the meantime, switching to a Pap-test based OS remains a cost-effective  
27 alternative, and could lead the way to implementing HPV-testing.

28 As for p16/KI67 double-staining, our results showed that it was a cost-effective opportunity when  
29 used as a confirmation test or as a primary test if the tariffs can be negotiated. However, the  
30 sensitivity and specificity were based on a single study with centralized reading. It will required  
31 additional studies, in different context in France to confirm that the results are reproducible before  
32 generalizing it use.

33 In summary, this modelling study enables the INCa to provide robust information to support public  
34 decision on both efficient intermediate modalities for implementation of the CC OS programme but  
35 also on optimal screening strategies in a medium term and anticipate the integration of promising  
36 technological innovations.

37

1  
2  
3 **1 Funding**

4  
5 2 This work was entirely funded by the National Cancer Institute.

6  
7 **3 Declaration of interests**

8  
9 4 The authors have no conflict of interest to declare concerning this study.

10  
11 **5 Authorship Statement**

12 6 All authors participated in the study. Barré S, Leleu H and Massetti M participated in model  
13 7 development, data analysis and redaction of the draft of the manuscript. Barré S and De Bels F made  
14 8 critical review of the manuscript and approved its final version.

15  
16 **9 Notes/Acknowledgments**

17  
18 10 The authors acknowledge the members of the Scientific Committee for study for their critical review  
19 11 of the methodological choices, discussion of the results and conclusions of this medico-economic  
20 12 evaluation study:

21  
22 13 Pr Jean Jacques Baldauf (Centre hospitalier universitaire de Strasbourg), Dr Anne Sophie Banaszuk  
23 14 (Structure de gestion du Maine et Loire), Nathalie Beltzer (Santé Publique France), Dr Mohamed-  
24 15 Béchir Ben Hadj Yahia (Centre hospitalier régional universitaire de Lille), Julia Bonastre (Institut  
25 16 Gustave Roussy), Dr Véronique Dalstein (Centre hospitalier universitaire Reims), Dr Marie Flori  
26 17 (Université de Lyon 1), Julie Gaillot (Institut National du Cancer), Chrystelle Gastaldi-Ménager (Caisse  
27 18 nationale d'assurance maladie des travailleurs salariés), Ken Haguenoer (Centre hospitalier régional  
28 19 universitaire de Tours), Françoise Hamers (Santé Publique France), Guy Launoy (Centre hospitalier  
29 20 universitaire de Caen, Inserm), Patricia Lucidarne (Collège national des sages-femmes), Emmanuel  
30 21 Ricard (Ligue Nationale contre le cancer), Jean-Paul Romarin (Agence régionale de santé du  
31 22 Languedoc-Roussillon Midi-Pyrénées), Catherine Rumeau-Pichon (Haute Autorité de Santé),  
32 23 Emmanuelle Salines (Ministère de la Santé) Nadia Thomas (Structure de gestion de Guyane), Alain  
33 24 Trugeon (Observatoire régional de santé de Picardie), Hélène Vandewalle (Institut National du  
34 25 Cancer), Anne Sophie Woronoff (Registre des cancers du Doubs), Laura Zanetti (Haute Autorité de  
35 26 Santé)

36  
37  
38  
39 27  
40  
41  
42  
43  
44  
45  
46  
47  
48  
49  
50  
51  
52  
53  
54  
55  
56  
57  
58  
59  
60



## REFERENCES

1. Haute Autorité de Santé. État des lieux et recommandations pour le dépistage du cancer du col de l'utérus en France. 2010. [http://www.has-sante.fr/portail/jcms/c\\_1009772/fr/etat-des-lieux-et-recommandations-pour-le-depistage-du-cancer-du-col-de-l-uterus-en-France](http://www.has-sante.fr/portail/jcms/c_1009772/fr/etat-des-lieux-et-recommandations-pour-le-depistage-du-cancer-du-col-de-l-uterus-en-France)
2. Monnereau A, Remontet L, Maynadié, *et al.* Estimation nationale de l'incidence des cancers en France entre 1980 et 2012. Etude à partir des registres des cancers du réseau Francim - Partie 1 : tumeurs solides. 2013. <http://invs.santepubliquefrance.fr/Publications-et-outils/Rapports-et-syntheses/Maladies-chroniques-et-traumatismes/2013/Estimation-nationale-de-l-incidence-des-cancers-en-France-entre-1980-et-2012>
3. Institut National du Cancer. Généralisation du dépistage du cancer du col de l'utérus /Étude médico-économique /Phase 1. 2015. <http://www.e-cancer.fr/Expertises-et-publications/Catalogue-des-publications/Synthese-Generalisation-du-depistage-du-cancer-du-col-de-l-uterus-etude-medico-economique-Phase-1>
4. Institut de Veille Sanitaire. Vaccination rate among women under 30. 2015. Personal Communication
5. Ministère des Affaires sociales et de la santé, Ministère de l'Enseignement supérieur et de la recherche. Plan Cancer 2014-2019, Guérir et prévenir les cancers : donnons les mêmes chances à tous, partout en France. 2014. <http://www.e-cancer.fr/Plan-cancer/Plan-cancer-2014-2019-priorites-et-objectifs>
6. Haguenoer K, Sengchanh S, Gaudy-Graffin C, *et al.* Vaginal self-sampling is a cost-effective way to increase participation in a cervical cancer screening programme: a randomised trial. *British journal of cancer.* 2014;111(11):2187-96.
7. Dalstein V, Charlier B, Botokeky J, *et al.* Évaluation intermédiaire de START -HPV, programme pilote de dépistage primaire par test HPV des lésions précancéreuses et cancéreuses du col utérin dans le département des Ardennes, France, 2012-2013. *Bull Epidémiol Hebd.* 2014(13-14-15):254-9.
8. Bergeron C, Ikenberg H, Sideri M, *et al.* Prospective evaluation of p16/Ki-67 dual-stained cytology for managing women with abnormal Papanicolaou cytology: PALMS study results. *Cancer Cytopathol.* 2015;123(6):373-81.
9. Demarteau N, Detournay B, Tehard B, *et al.* A generally applicable cost-effectiveness model for the evaluation of vaccines against cervical cancer. *International journal of public health.* 2011;56(2):153-62.
10. Binder-Foucard F, Belot A, Delafosse P, *et al.* Estimation nationale de l'incidence et de la mortalité par cancer en France entre 1980 et 2005. Etude à partir des registres des cancers du réseau Francim - Partie 1 : tumeurs solides. 2008 <http://invs.santepubliquefrance.fr/Publications-et-outils/Rapports-et-syntheses/Maladies-chroniques-et-traumatismes/2013/Estimation-nationale-de-l-incidence-et-de-la-mortalite-par-cancer-en-France-entre-1980-et-2012>
11. Dervaux B, Lenne X, Lévy-Bruhl D, *et al.* Modélisation médico-économique de l'impact de l'organisation du dépistage du cancer du col utérin et de l'introduction de la vaccination contre les HPV dans le calendrier vaccinal. 2008. [https://www.mesvaccins.net/textes/rapport\\_modelisation\\_hpv.pdf](https://www.mesvaccins.net/textes/rapport_modelisation_hpv.pdf)

- 1 12. Myers E R, McCrory D C, Nanda K, *et al*. Mathematical model for the natural history of human  
2 papillomavirus infection and cervical carcinogenesis. *American journal of epidemiology*.  
3 2000;151(12):1158-71.
- 4 13. Wright J D, Chen L, Tergas A I, *et al*. Population-level trends in relative survival for cervical  
5 cancer. *Am J Obstet Gynecol*. 2015.
- 6 14. Mustafa R A, Santesso N, Khatib R, *et al*. Systematic reviews and meta-analyses of the  
7 accuracy of HPV tests, visual inspection with acetic acid, cytology, and colposcopy. *Int J Gynaecol*  
8 *Obstet*. 2016;132(3):259-65.
- 9 15. Ikenberg H, Bergeron C, Schmidt D, *et al*. Screening for cervical cancer precursors with  
10 p16/Ki-67 dual-stained cytology: results of the PALMS study. *Journal of the National Cancer Institute*.  
11 2013;105(20):1550-7.
- 12 16. Mayrand M. H, Duarte-Franco E, Rodrigues I, *et al*. Human papillomavirus DNA versus  
13 Papanicolaou screening tests for cervical cancer. *N Engl J Med*. 2007;357(16):1579-88.
- 14 17. Duport N, Salines E, Grémy I. Premiers résultats de l'évaluation du programme expérimental  
15 de dépistage organisé du cancer du col de l'utérus, France, 2010-2012 *Bull Epidémiol Hebd*. 2014(13-  
16 14-15):228-34.
- 17 18. Riethmuller D, Gay C, Bertrand X, *et al*. Genital human papillomavirus infection among  
18 women recruited for routine cervical cancer screening or for colposcopy determined by Hybrid  
19 Capture II and polymerase chain reaction. *Diagn Mol Pathol*. 1999;8(3):157-64.
- 20 19. Clavel C, Masure M, Bory J P, *et al*. Human papillomavirus testing in primary screening for the  
21 detection of high-grade cervical lesions: a study of 7932 women. *British journal of cancer*.  
22 2001;84(12):1616-23.
- 23 20. Boulanger J C, Sevestre H, Bauville E, *et al*. [Epidemiology of HPV infection]. *Gynecol Obstet*  
24 *Fertil*. 2004;32(3):218-23.
- 25 21. Beby-Defaux A, Bourgoin A, Ragot S, *et al*. Human papillomavirus infection of the cervix uteri  
26 in women attending a Health Examination Center of the French social security. *Journal of medical*  
27 *virology*. 2004;73(2):262-8.
- 28 22. Dalstein V, Riethmuller D, Sautiere J L, *et al*. Detection of cervical precancer and cancer in a  
29 hospital population; benefits of testing for human papillomavirus. *European journal of cancer*  
30 (Oxford, England : 1990). 2004;40(8):1225-32.
- 31 23. Moscicki A B, Hills N, Shiboski S, *et al*. Risks for incident human papillomavirus infection and  
32 low-grade squamous intraepithelial lesion development in young females. *Jama*. 2001;285(23):2995-  
33 3002.
- 34 24. Melnikow J, Nuovo J, Willan A R, *et al*. Natural history of cervical squamous intraepithelial  
35 lesions: a meta-analysis. *Obstetrics and gynecology*. 1998;92(4 Pt 2):727-35.
- 36 25. Nobbenhuis M A, Helmerhorst T J, van den Brule A J, *et al*. Cytological regression and  
37 clearance of high-risk human papillomavirus in women with an abnormal cervical smear. *Lancet*.  
38 2001;358(9295):1782-3.
- 39 26. Sanders G D, Taira A V. Cost-effectiveness of a potential vaccine for human papillomavirus.  
40 *Emerg Infect Dis*. 2003;9(1):37-48.

- 1  
2  
3 1 27. Van de Velde N, Brisson M, Boily M C Modeling human papillomavirus vaccine effectiveness:  
4 2 quantifying the impact of parameter uncertainty. American journal of epidemiology.  
5 3 2007;165(7):762-75.  
6  
7 4 28. Haute Autorité de Santé. Choix méthodologiques pour l'évaluation médico-économique à la  
8 5 HAS. 2011. [http://www.has-sante.fr/portail/upload/docs/application/pdf/2011-](http://www.has-sante.fr/portail/upload/docs/application/pdf/2011-11/guide_methodo_vf.pdf)  
9 6 [11/guide\\_methodo\\_vf.pdf](http://www.has-sante.fr/portail/upload/docs/application/pdf/2011-11/guide_methodo_vf.pdf)  
10  
11 7 29. Accetta G, Biggeri A, Carreras G, *et al.* Is human papillomavirus screening preferable to  
12 8 current policies in vaccinated and unvaccinated women? A cost-effectiveness analysis. Journal of  
13 9 medical screening. 2010;17(4):181-9.  
14  
15 10 30. Berkhof J, Coupe V M, Bogaards J A, *et al.* The health and economic effects of HPV DNA  
16 11 screening in The Netherlands. International journal of cancer Journal international du cancer.  
17 12 2010;127(9):2147-58.  
18  
19 13 31. Burger E A, Kim J J. The value of improving failures within a cervical cancer screening  
20 14 program: an example from Norway. International journal of cancer Journal international du cancer.  
21 15 2014;135(8):1931-9.  
22  
23  
24  
25  
26  
27  
28  
29  
30  
31  
32  
33  
34  
35  
36  
37  
38  
39  
40  
41  
42  
43  
44  
45  
46  
47  
48  
49  
50  
51  
52  
53  
54  
55  
56  
57  
58  
59  
60

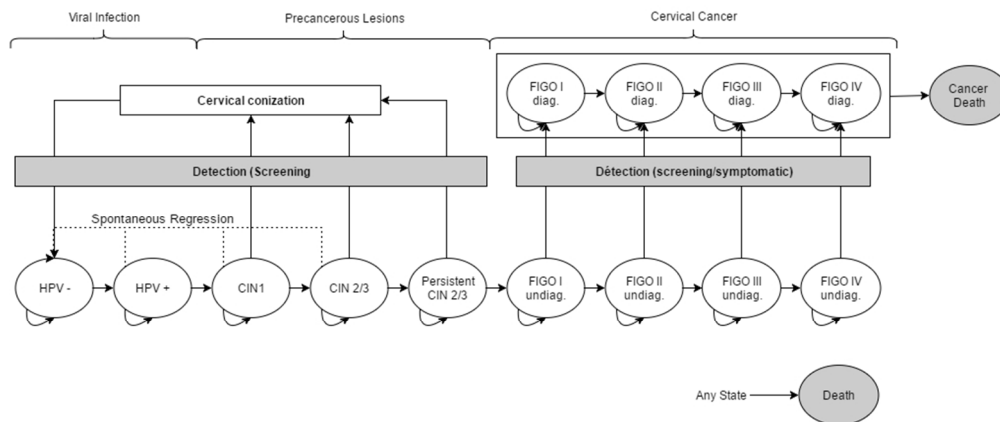

Structure of the model for the natural history of cervical cancer

269x113mm (96 x 96 DPI)

Peer review only

1  
2  
3  
4  
5  
6  
7  
8  
9  
10  
11  
12  
13  
14  
15  
16  
17  
18  
19  
20  
21  
22  
23  
24  
25  
26  
27  
28  
29  
30  
31  
32  
33  
34  
35  
36  
37  
38  
39  
40  
41  
42  
43  
44  
45  
46  
47  
48  
49  
50  
51  
52  
53  
54  
55  
56  
57  
58  
59  
60

1  
2  
3  
4  
5  
6  
7  
8  
9  
10  
11  
12  
13  
14  
15  
16  
17  
18  
19  
20  
21  
22  
23  
24  
25  
26  
27  
28  
29  
30  
31  
32  
33  
34  
35  
36  
37  
38  
39  
40  
41  
42  
43  
44  
45  
46  
47  
48  
49  
50  
51  
52  
53  
54  
55  
56  
57  
58  
59  
60

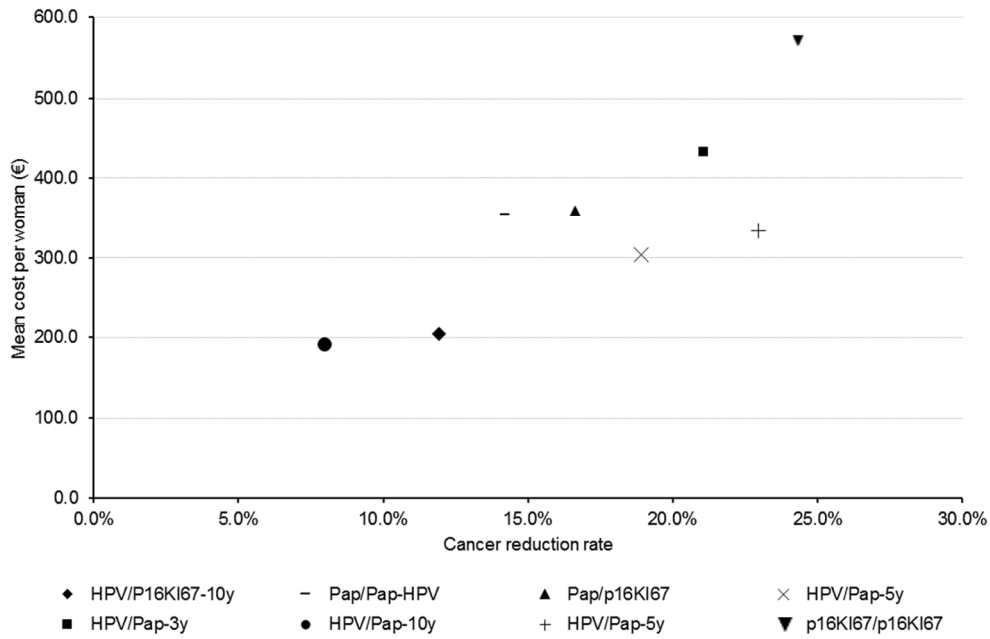

Impact of OS strategies assessed on cancer reduction rate and associated mean cost

372x237mm (96 x 96 DPI)

Review only

Supplementary

File 1 Screening algorithms

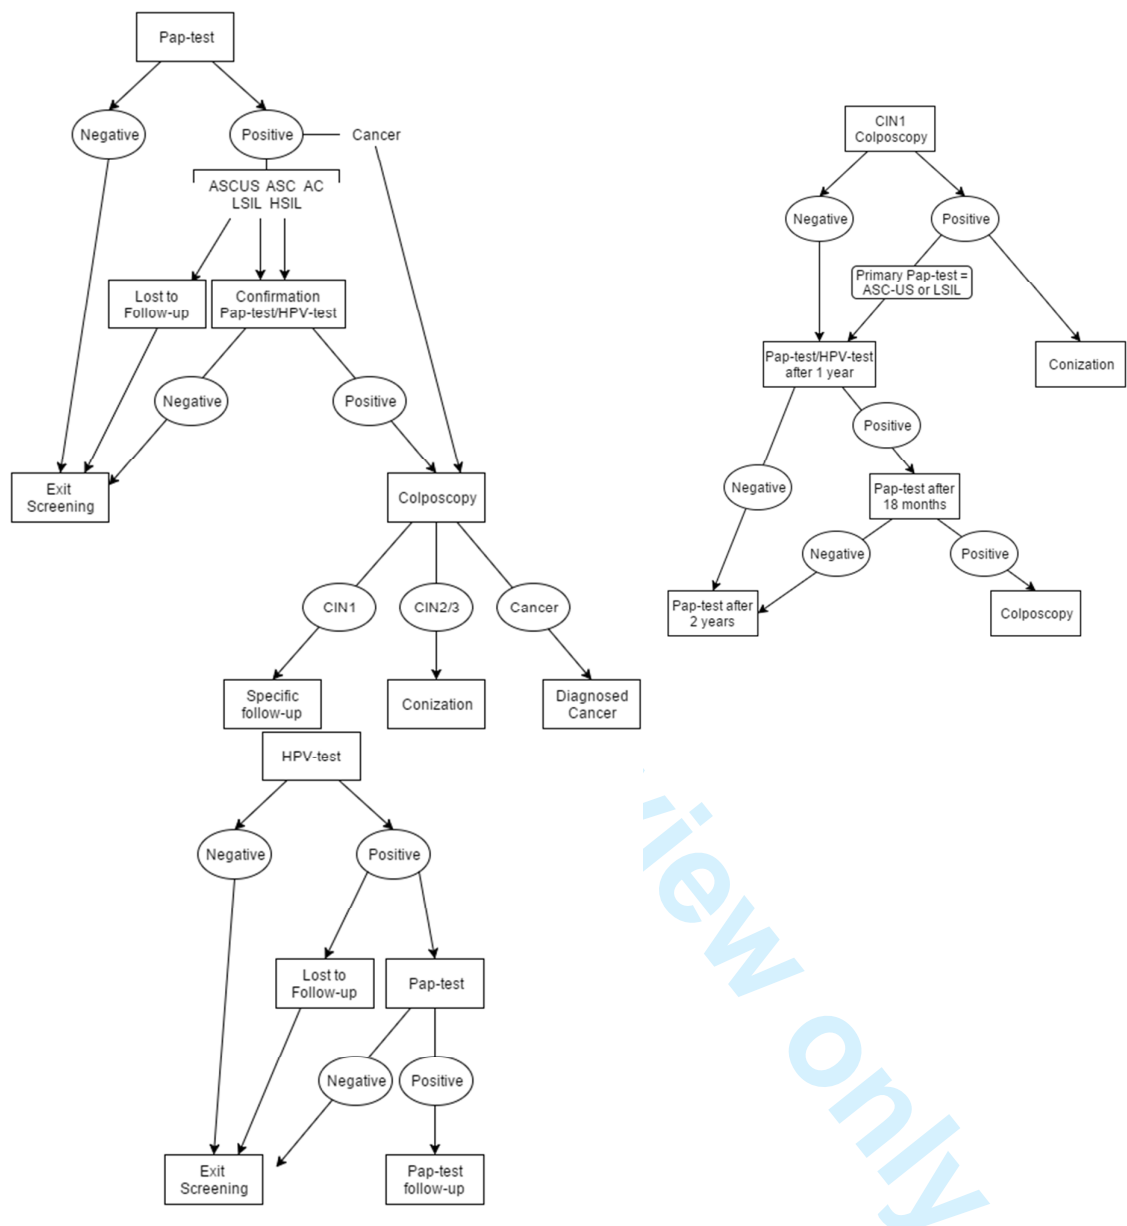

view only

1  
2  
3  
4  
5  
6  
7  
8  
9  
10  
11  
12  
13  
14  
15  
16  
17  
18  
19  
20  
21  
22  
23  
24  
25  
26  
27  
28  
29  
30  
31  
32  
33  
34  
35  
36  
37  
38  
39  
40  
41  
42  
43  
44  
45  
46  
47  
48  
49  
50  
51  
52  
53  
54  
55  
56  
57  
58  
59  
60

## File 2 Individual screening participation and periodicity data

| IS period | Distribution |
|-----------|--------------|
| Annual    | 5,9%         |
| 2 years   | 21,5%        |
| 3 years   | 18,7%        |
| 4 years   | 8,6%         |
| 5 years   | 4,3%         |
| 6 years   | 2,8%         |
| 7 years   | 1,8%         |
| 8 years   | 1,1%         |
| 9 years   | 0,7%         |
| 10 years  | 0,5%         |

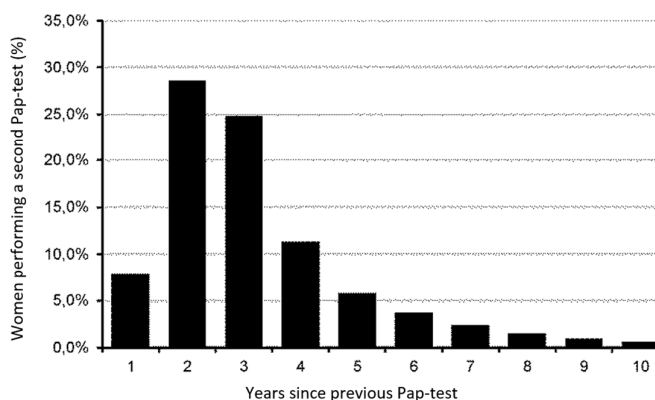

| Population                                                   | RR   | Source                                          |
|--------------------------------------------------------------|------|-------------------------------------------------|
| <b>Age</b>                                                   |      |                                                 |
| 25 – 30                                                      | 1,06 | National health insurance database <sup>3</sup> |
| 30 – 35                                                      | 1,08 | National health insurance database <sup>3</sup> |
| 35 – 40                                                      | 1,07 | National health insurance database <sup>3</sup> |
| 40 – 45                                                      | 1,04 | National health insurance database <sup>3</sup> |
| 50 – 55                                                      | 0,92 | National health insurance database <sup>3</sup> |
| 55 – 60                                                      | 0,82 | National health insurance database <sup>3</sup> |
| 60 – 65                                                      | 0,77 | National health insurance database <sup>3</sup> |
| <b>Universal complementary health insurance registration</b> |      |                                                 |
| Yes                                                          | 0,80 | National health insurance database <sup>3</sup> |
| No                                                           | 1,03 | National health insurance database <sup>3</sup> |

Each woman is associated to a SI participation status (Yes/No) and a screening period. Age-dependent probabilities of becoming NP are applied throughout the simulation to account for the lesser participation in older women. These probabilities are determined as follows:

$$P_{become\ non-participant} = (RR_{next\ age-group} / RR_{current\ age-group}) / 5$$

## File 3 Pap-test results depending on HPV infection or lesion type

|                     | ASCUS  | ASC   | AC    | LSIL   | HSIL   | Cancer |
|---------------------|--------|-------|-------|--------|--------|--------|
| HPV-                | 53.5%  | 1.5%  | 2.7%  | 40.1%  | 2.3%   | 0.0%   |
| HPV+                | 53.5%  | 1.5%  | 2.7%  | 40.1%  | 2.3%   | 0.0%   |
| CIN1                | 53.5 % | 1.5 % | 2.7 % | 40.1 % | 2.3 %  | 0.0 %  |
| CIN2/3              | 26.2 % | 6.0 % | 9.6 % | 32.4 % | 23.2 % | 2.6 %  |
| Cancer (all stages) | 0.0%   | 0.0%  | 0.0%  | 0.0%   | 0.0%   | 100.0% |

## File 4 Follow-up of positive Pap-test, by Pap-test result

|        | Confirmation<br>Pap-test | Confirmation<br>HPV-test | Colposcopy | Conization | Lost to follow-up |
|--------|--------------------------|--------------------------|------------|------------|-------------------|
| ASCUS  | 36,9 %                   | 10,8 %                   | 23,9 %     | 1,3 %      | 27,1 %            |
| ASC    | 36,3 %                   | 0,0 %                    | 48,8 %     | 7,1 %      | 7,8 %             |
| AC     | 6,5 %                    | 0,0 %                    | 30,7 %     | 7,0 %      | 55,9 %            |
| LSIL   | 36,2 %                   | 0,0 %                    | 32,0 %     | 3,5 %      | 28,3 %            |
| HSIL   | 21,4 %                   | 0,0 %                    | 50,1 %     | 19,1 %     | 9,4 %             |
| Cancer | 10,0 %                   | 0,0 %                    | 85,0 %     | 5,0 %      | 0,0 %             |



**File 5 Model validation results**

The model faithfully reproduces cancer incidence, however the modelled CC mortality was slightly higher than observed data, although differences were systematically inferior to 4 per 100,000.

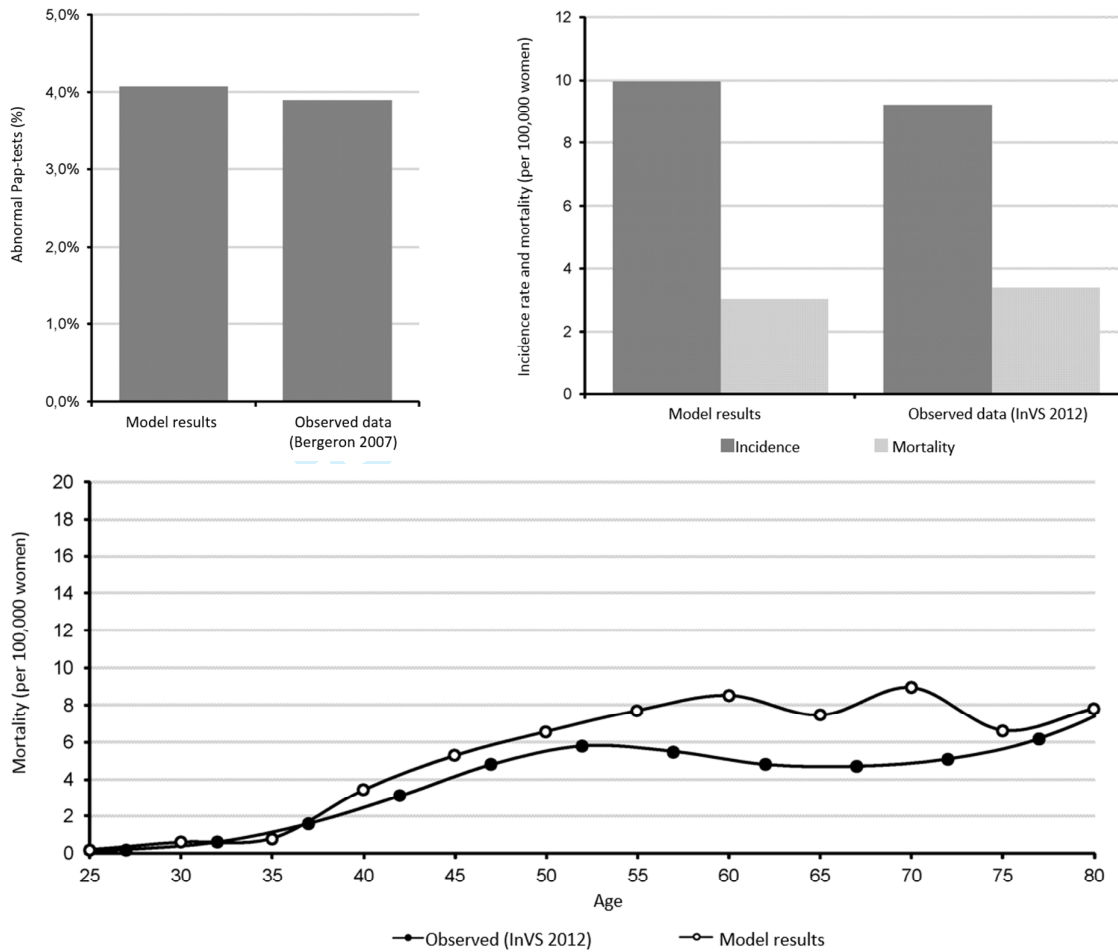

only

**Table**

**Table 1 | CHEERS checklist—Items to include when reporting economic evaluations of health interventions**

| Section/item                                           | Item No | Recommendation                                                                                                                                                                                                                                                                                                                                        | Reported on page No/ line No |
|--------------------------------------------------------|---------|-------------------------------------------------------------------------------------------------------------------------------------------------------------------------------------------------------------------------------------------------------------------------------------------------------------------------------------------------------|------------------------------|
| <b>Title and abstract</b>                              |         |                                                                                                                                                                                                                                                                                                                                                       |                              |
| Title                                                  | 1       | Identify the study as an economic evaluation or use more specific terms such as “cost-effectiveness analysis”, and describe the interventions compared.                                                                                                                                                                                               | 1/1                          |
| Abstract                                               | 2       | Provide a structured summary of objectives, perspective, setting, methods (including study design and inputs), results (including base case and uncertainty analyses), and conclusions.                                                                                                                                                               | 2/1                          |
| <b>Introduction</b>                                    |         |                                                                                                                                                                                                                                                                                                                                                       |                              |
| Background and objectives                              | 3       | Provide an explicit statement of the broader context for the study.                                                                                                                                                                                                                                                                                   | 3/2-27                       |
|                                                        |         | Present the study question and its relevance for health policy or practice decisions.                                                                                                                                                                                                                                                                 | 3/28-33                      |
| <b>Methods</b>                                         |         |                                                                                                                                                                                                                                                                                                                                                       |                              |
| Target population and subgroups                        | 4       | Describe characteristics of the base case population and subgroups analysed, including why they were chosen.                                                                                                                                                                                                                                          | 5/14<br>6/13-20              |
| Setting and location                                   | 5       | State relevant aspects of the system(s) in which the decision(s) need(s) to be made.                                                                                                                                                                                                                                                                  | 6/13-15                      |
| Study perspective                                      | 6       | Describe the perspective of the study and relate this to the costs being evaluated.                                                                                                                                                                                                                                                                   | 6/38                         |
| Comparators                                            | 7       | Describe the interventions or strategies being compared and state why they were chosen.                                                                                                                                                                                                                                                               | 5/2-13                       |
| Time horizon                                           | 8       | State the time horizon(s) over which costs and consequences are being evaluated and say why appropriate.                                                                                                                                                                                                                                              | 5/26-27                      |
| Discount rate                                          | 9       | Report the choice of discount rate(s) used for costs and outcomes and say why appropriate.                                                                                                                                                                                                                                                            | 9/6-10                       |
| Choice of health outcomes                              | 10      | Describe what outcomes were used as the measure(s) of benefit in the evaluation and their relevance for the type of analysis performed.                                                                                                                                                                                                               | 9/6                          |
| Measurement of effectiveness                           | 11a     | <i>Single study-based estimates:</i> Describe fully the design features of the single effectiveness study and why the single study was a sufficient source of clinical effectiveness data.                                                                                                                                                            |                              |
|                                                        | 11b     | <i>Synthesis-based estimates:</i> Describe fully the methods used for identification of included studies and synthesis of clinical effectiveness data.                                                                                                                                                                                                | NA                           |
| Measurement and valuation of preference based outcomes | 12      | If applicable, describe the population and methods used to elicit preferences for outcomes.                                                                                                                                                                                                                                                           | NA                           |
| Estimating resources and costs                         | 13a     | <i>Single study-based economic evaluation:</i> Describe approaches used to estimate resource use associated with the alternative interventions. Describe primary or secondary research methods for valuing each resource item in terms of its unit cost. Describe any adjustments made to approximate to opportunity costs.                           |                              |
|                                                        | 13b     | <i>Model-based economic evaluation:</i> Describe approaches and data sources used to estimate resource use associated with model health states. Describe primary or secondary research methods for valuing each resource item in terms of its unit cost. Describe any adjustments made to approximate to opportunity costs.                           | 6/38 - 7/6                   |
| Currency, price date, and conversion                   | 14      | Report the dates of the estimated resource quantities and unit costs. Describe methods for adjusting estimated unit costs to the year of reported costs if necessary. Describe methods for converting costs into a common currency base and the exchange rate.                                                                                        | 6/40-41                      |
| Choice of model                                        | 15      | Describe and give reasons for the specific type of decision-analytical model used. Providing a figure to show model structure is strongly recommended.                                                                                                                                                                                                | 5/21-23                      |
| Assumptions                                            | 16      | Describe all structural or other assumptions underpinning the decision-analytical model.                                                                                                                                                                                                                                                              | Table 2; 6/26 - 7/6          |
| Analytical methods                                     | 17      | Describe all analytical methods supporting the evaluation. This could include methods for dealing with skewed, missing, or censored data; extrapolation methods; methods for pooling data; approaches to validate or make adjustments (such as half cycle corrections) to a model; and methods for handling population heterogeneity and uncertainty. | 7/6-15                       |
| <b>Results</b>                                         |         |                                                                                                                                                                                                                                                                                                                                                       |                              |
| Study parameters                                       | 18      | Report the values, ranges, references, and, if used, probability distributions for all parameters. Report reasons or sources for distributions used to represent uncertainty where appropriate. Providing a table to show the input values is strongly recommended.                                                                                   | Table 2                      |
| Incremental costs and outcomes                         | 19      | For each intervention, report mean values for the main categories of estimated costs and outcomes of interest, as well as mean differences between the comparator groups. If applicable, report incremental cost-effectiveness ratios.                                                                                                                | Tables 3 & 4                 |
| Characterising uncertainty                             | 20a     | <i>Single study-based economic evaluation:</i> Describe the effects of sampling uncertainty for the estimated incremental cost and incremental effectiveness parameters, together with the impact of methodological assumptions (such as discount rate, study perspective).                                                                           | Tables 5 & 6                 |

(continued)

| Section/item                                                                                                     | Item No | Recommendation                                                                                                                                                                                                                                                             | Reported on page No/line No |
|------------------------------------------------------------------------------------------------------------------|---------|----------------------------------------------------------------------------------------------------------------------------------------------------------------------------------------------------------------------------------------------------------------------------|-----------------------------|
|                                                                                                                  | 20b     | <i>Model-based economic evaluation</i> : Describe the effects on the results of uncertainty for all input parameters, and uncertainty related to the structure of the model and assumptions.                                                                               |                             |
| Characterising heterogeneity                                                                                     | 21      | If applicable, report differences in costs, outcomes, or cost-effectiveness that can be explained by variations between subgroups of patients with different baseline characteristics or other observed variability in effects that are not reducible by more information. |                             |
| <b>Discussion</b>                                                                                                |         |                                                                                                                                                                                                                                                                            |                             |
| Study findings, limitations, generalisability, and current knowledge                                             | 22      | Summarise key study findings and describe how they support the conclusions reached. Discuss limitations and the generalisability of the findings and how the findings fit with current knowledge.                                                                          |                             |
| <b>Other</b>                                                                                                     |         |                                                                                                                                                                                                                                                                            |                             |
| Source of funding                                                                                                | 23      | Describe how the study was funded and the role of the funder in the identification, design, conduct, and reporting of the analysis. Describe other non-monetary sources of support.                                                                                        |                             |
| Conflicts of interest                                                                                            | 24      | Describe any potential for conflict of interest of study contributors in accordance with journal policy. In the absence of a journal policy, we recommend authors comply with International Committee of Medical Journal Editors recommendations.                          |                             |
| For consistency, the CHEERS statement checklist format is based on the format of the CONSORT statement checklist |         |                                                                                                                                                                                                                                                                            |                             |

# BMJ Open

## Organized screening for cervical cancer in France: a cost-effectiveness assessment

|                                 |                                                                                                                                                                                                           |
|---------------------------------|-----------------------------------------------------------------------------------------------------------------------------------------------------------------------------------------------------------|
| Journal:                        | <i>BMJ Open</i>                                                                                                                                                                                           |
| Manuscript ID                   | bmjopen-2016-014626.R1                                                                                                                                                                                    |
| Article Type:                   | Research                                                                                                                                                                                                  |
| Date Submitted by the Author:   | 20-Apr-2017                                                                                                                                                                                               |
| Complete List of Authors:       | Barré, Stéphanie; Institut National du Cancer, Dépistage<br>Masseti, Marc; Public Health Expertise,<br>Leleu, Henri; Public Health Expertise<br>De Bels, Frédéric; Institut National du Cancer, Dépistage |
| <b>Primary Subject Heading</b>: | Health economics                                                                                                                                                                                          |
| Secondary Subject Heading:      | Oncology, Public health, Diagnostics                                                                                                                                                                      |
| Keywords:                       | Health economics < HEALTH SERVICES ADMINISTRATION & MANAGEMENT, Gynaecological oncology < GYNAECOLOGY, PUBLIC HEALTH                                                                                      |
|                                 |                                                                                                                                                                                                           |

SCHOLARONE™  
Manuscripts

Peer review only

## Organized screening for cervical cancer in France: a cost-effectiveness assessment

### Authors:

Barré Stéphanie<sup>1</sup>, Massetti M<sup>2</sup>, Leleu H<sup>2</sup>, De Bels F<sup>1</sup>

1. French National Cancer Institute (INCa), 52 avenue André Morizet, Boulogne Billancourt Cedex, 92513, France.

2. Public Health Expertise, 157 rue du faubourg Saint Antoine, Paris, 75011, France.

### Corresponding author:

Barré Stéphanie, [sbarre@institutcancer.fr](mailto:sbarre@institutcancer.fr), +33 (0) 1 41 10 14 10

**Word count: 3550**

#### French National Cancer Institute

The French National Cancer Institute was established under the Public Health Act of 9 August 2004 as the government health and science agency specialised in cancer control. It is a Public Interest Grouping which brings together State representatives, charities, health insurance funds, hospital federations and research organisations. It is responsible for rolling out the 2014-2019 Cancer Control Plan and reports to the Ministries for Health and for Research.

The Institute provides an integrated approach encompassing all cancer-control dimensions (health, scientific, social and economic) and areas of intervention (prevention, screening, care and research), for the benefit of patients and their relatives.

[www.e-cancer.fr](http://www.e-cancer.fr)

## ABSTRACT

**OBJECTIVE:** According to the third cancer plan, organized screening (OS) of cervical cancer (CC) among women aged 25-65 years should be implemented in France in the forthcoming years. The most efficient way to implement OS in the French health care system is yet to be determined.

**METHODS:** A microsimulation model was developed by the French National Institute of Cancer (INCa) alongside clinical experts and stakeholder representatives. A closed cohort of women eligible for CC screening and representative in terms of age and participation in individual screening (IndScr) was modelled on a lifetime horizon. Different OS strategies, additive to IndScr and based on mailed invitations to perform OS with different screening tests (Papanicolaou (Pap) test, HPV test, and p16/Ki67 double-staining) and OS periodicity, were assessed, adopting a collective "all payers" perspective.

**RESULTS:** Compared to the current IndScr only situation, all OS strategies were associated with decreased cancer incidence/mortality (from -14.2%/-13.5% to -22.9%/-25.8%). Most strategies generated extra costs ranging from €37.9 to €1,607 per eligible woman. HPV testing every 10 and 5 years were cost-saving.

HPV tests every 10 and 5 years were the most efficient strategies, generating more survival at lower costs than Pap-based strategies. Compared to IndScr only, an HPV test every 10 years was cost-saving. The most effective strategies were p16/Ki67 as primary or HPV positive confirmation tests, with respective ICERs of €6,541,250 and €101,391 per life year. Pap-based strategies generated intermediary results.

**CONCLUSION:** OS strategies based on the HPV test appear highly efficient. However, our results rely on the assumption that women and practitioners comply with the recommended OS periodicities (3, 5, 10 years). Implementing these OS modalities will require major adaptations to the current CC screening organization. Pap-test based strategies might be simpler to set-up while preparing an appropriate implementation of more efficient OS screening modalities.

### Strengths and limitations of the study

- A microsimulation model was developed to assess the efficiency of possible cervical cancer organized screening strategies in France.
- The model operates on individual women who are eligible for screening and representative of the current French population on a lifetime horizon.
- Real-life practices and data were used, allowing for the fine modelling of the screening and validation against observed data.
- The lack of precision of transition probabilities in the context of a low incidence of cervical cancer, as well as the assumptions required to model screening practices after primary HPV tests, are the main limitations of the study.

For peer review only

## BACKGROUND

The natural history of cervical cancer (CC) is related to a persistent HPV infection of the cervix leading to squamous intraepithelial lesions that can evolve into cancerous lesions. CC prevention is based on screening to detect and remove lesions at the early stages to prevent invasive cancer and an anti-HPV vaccination to reduce cancer-associated HPV infection.[1]

In France, CC prevention is based on individual voluntary screening (IndScr) for CC of women aged 25 to 65 years and vaccination. IndScr is based on a Papanicolaou test (Pap test) every 3 years, after two annual Pap tests that are negative. Approximately 90% of Pap smears are done by gynaecologists, although general practitioners (GP) and midwives are also authorized to perform it. IndScr has led to a significant decrease in the incidence and associated mortality of CC in the past 20 years. In 2012, CC was the 11<sup>th</sup> most frequent and 12<sup>th</sup> most lethal form of cancer in women.[2] However, many women still do not participate in CC screening. Participation in IndScr was found to be approximately 61% of eligible women, with low access to healthcare, comorbidities and poverty being risk factors for non-participation.

Screening remains the main prevention tool in France, as anti-HPV vaccination is restricted to younger age groups and was only recently made available. Furthermore, vaccination has had a slow adoption in the French population. In 2015, it was estimated that only 17% of women eligible for vaccination were vaccinated.[3;4] In 2014, the third French Cancer Plan has been presented to address both the human and the societal challenges of cancer. CC organized screening (OS) implementation among women aged 25-65 years is part of its first operational objective and aims at a participation rate of 80% and a 30% reduction in CC-related mortality by 2019.[5]

Several OS experimentations have been performed in France to assess the efficacy of different screening modalities, including invitation and positive tests follow-up (FU), self-sampling and HPV-testing. Experimentations that consisted of an invitation of non-participants to perform a Pap test allowed to catch up with 13.2% of all eligible women after 3 years and reduced the lost to follow-up (LtFU) rates of women after a positive result.[6] Additionally, primary HPV-testing and self-sampling were shown to be a feasible alternative to the Pap smear in France.[7;8] Finally, innovative testing, such as p16/Ki67 double-staining, was shown to be a performant alternative for CC screening compared to HPV screening or the Pap test.[9]

Consequently, many alternative strategies can be considered for the implementation of OS for CC in France. Thus, a medico-economic evaluation of several OS strategies based on a cost-effectiveness analysis was performed by the French national cancer institute (INCa), which relied on a scientific steering committee that involved clinical experts and stakeholder representatives (social security, ministry of health, patients and professionals) providing advice on the methodological choices and best OS implementation modality in the French context.



## METHODS

Seven strategies were compared to the current IndScr-only situation (table 1). These strategies were all based on adding to the current IndScr with the dispatch of screening invitations (followed by a single recall) to women who did not spontaneously participate in the last 3 years (non-participants). Hence, women who did not participate in regular screening are the only ones targeted by the interventions. OS strategies also included improved FU, resulting in a reduction in LtFU women.

Different screening tests were considered for primary screening or confirmation after a positive primary test, including Pap test, HPV DNA detection and p16/Ki67 double-staining. The women who tested positive for both primary and confirmation tests went through colposcopy and conization if a high-grade (grade 2 or worse [CIN2+]) cervical intraepithelial neoplasia (CIN) lesion was identified. Women with CIN1 were retested at 12, 18 and 24 months if the initial lesion was atypical squamous cells of undetermined significance (ASC-US) or low-grade squamous intraepithelial lesion (LSIL) on Pap, or went through colposcopy. The women who tested positive for a primary test and negative for confirmation were retested after one year. A fraction of the participants was LtFU. Women could only be invited once per cycle. Detailed screening algorithms are available as supplementary material.

The population was limited to women aged 25-65 years who are currently eligible for IndScr.

Table 1 Strategies compared

| Strategy         | IR + Improved Follow-up | Primary test       | Confirmation test after positive primary test |
|------------------|-------------------------|--------------------|-----------------------------------------------|
| Current          | No                      | Pap-test / 3 years | Pap-test or HPV                               |
| Pap/Pap          | Yes                     | Pap-test / 3 years | Pap-test                                      |
| Pap/p16Ki67      | Yes                     | Pap-test / 3 years | p16/Ki67                                      |
| HPV/Pap-5y†      | Yes                     | HPV / 5 years      | Pap-test                                      |
| HPV/Pap-3y†      | Yes                     | HPV / 3 years      | Pap-test                                      |
| HPV/Pap-10y†     | Yes                     | HPV / 10 years     | Pap-test                                      |
| HPV/p16Ki67-5y†  | Yes                     | HPV / 5 years      | p16/Ki67                                      |
| HPV/p16Ki67-10y† | Yes                     | HPV / 10 years     | p16/Ki67                                      |
| p16Ki67/p16Ki67  | Yes                     | HPV / 3 years      | p16/Ki67                                      |

IR: invitation + recall for woman who did not participate in IndScr in the last 3 years (non-participant)

†: women 25-35 are not eligible for HPV screening and receive a Pap-test every 3y instead. Women who tested HPV+/confirmation- go through double testing (HPV + Pap) the following year.

### model structure

Given the complexity of screening algorithms (different testing/retesting frequencies) and interactions between participation rates and individual characteristics (age and social), a Markov state microsimulation model was developed. Considering the relatively slow progression of intraepithelial lesions and the long-term benefits of screening, a 1-year cycle-length was used. The model was adapted from a previously published cohort-based Markov model.[10] A cohort of 100,000 women was simulated. Due to the long-term development of the disease and its consequences, a lifetime horizon was applied.

The model first generates a woman with a randomly attributed age, IndScr participation and frequency, health state (HPV-, HPV+, CIN lesions or cancer) and vaccination attributes. At each cycle, women can progress through states that correspond to CC natural history: non-infected women can get an HPV infection according to an age- and vaccination-dependent risk. The infection can progress to CIN1, then CIN2/3 and finally FIGO 1 (Federation of Gynecology and Obstetrics) classified non-invasive cancer. HPV infection and CIN lesions can regress spontaneously until CIN2/3 lesions have

1  
2  
3 become persistent (pCIN2/3). Women in the pCIN2/3 state systematically progress to cancer at an  
4 age-dependant rate. FIGO1 lesions can progress to FIGO 2, 3 and 4 and become symptomatic. Once  
5 symptomatic, the lesion is treated and the woman remains in the corresponding treated state with  
6 an associated cancer mortality rate. An age-specific general mortality applies at any state.  
7

8 Each year, the model determines whether the woman undergoes screening individually or after  
9 invitation based on her participation periodicity, time since last screening and participation rates  
10 after invitation. Screening test results (positivity and lesion type for Pap tests and positivity for HPV  
11 and p16/Ki67) are determined based on the current state and type of test performed (supplementary  
12 file). After diagnosis, women with a non-cancerous lesion return to the non-infected state after  
13 conization and cancerous lesions are treated. The structure of the modelled natural history is  
14 presented in figure 1. More details on the model structure are given in the supplementary data.  
15  
16

### 17 input data

18 The input data used in the simulation are presented in table 2.  
19

20 The population characteristics are based on available epidemiologic and demographic data that are  
21 representative of the French population. Vaccination status is only determined in women  $\leq 30$  years  
22 old, as it was only recently available in France. IndScr participation and frequency depend on age and  
23 social status, and based on the national health insurance database (supplementary data),  
24 approximately 61.9 % of eligible women were found to participate in IndScr at a frequency  $\leq 4$   
25 years.[3] Distribution of each modelled health state by age was not available in France and was  
26 estimated by simulating a cohort of non-vaccinated 14-year-old women undergoing current IndScr-  
27 only screening over their lifetime (supplementary file).  
28  
29

30 Transition probabilities (TP) were based on a previously published model.[10] The HPV infection and  
31 pCIN2/3 to cancer progression probabilities were calibrated using the model to reproduce observed  
32 HPV and cancer prevalence by age.[1;11] The high-risk HPV annual infection rate was estimated to be  
33 3.5% to 14%, depending on age.[12] The impact of vaccination is simulated by applying a relative risk  
34 (RR) of infection.[1]  
35

36 Probabilities of cancer progression and emergence of symptoms were obtained from the CC natural  
37 history simulation model developed by Myers *et al.*[13] The cancer specific-mortality by grade and  
38 time since diagnosis was estimated from SEER using data for white women under 50, as it was  
39 assumed that non-specific mortality was low in this group.[14] General mortality was modelled  
40 according to the French national statistics office (INSEE) data.  
41  
42

43 The participation rates after invitation and recall, LtFU rate associated with IndScr, OS effect on LtFU,  
44 observed lesions on Pap smear and associated care were all based on observational data from French  
45 OS experimentations.[1]  
46

47 The sensitivity and specificity of screening tests were based on clinical studies for detecting CIN2/3  
48 lesions and took into account the test sequence (i.e., HPV after Pap or primary HPV).[9;15-17] One  
49 percent of Pap tests were non-interpretable, which led to a retest.[18] Colposcopy was assumed to  
50 have 100% sensitivity and specificity. A 95% efficacy was considered for conization.  
51

52 The model estimated OS cost and direct medical costs from a collective, "all payers" perspective, as  
53 recommended for France.[19] The OS costs covered invitations and recalls, as well as database  
54 management, tracking of women's participation and FU management. Cost data for consultations  
55 and medical care were based on national tariffs. No extra-consultation costs were added, as it was  
56 considered that IndScr participants did so during a routine consultation. The HPV-analysis tariff was  
57  
58  
59  
60

decreased by 60% in strategies with primary HPV-testing, assuming a substantial cost reduction in cases of an adoption of HPV-testing based OS. This assumption was validated by health insurance and health ministry representatives. According to public-health law, no extra co-payment is applied to OS participants. Cancer states were associated with costs accounting for care and FU by FIGO stage [12] when entering the corresponding diagnosed state. All costs were updated to 2016, using the national consumer price index for healthcare goods and services.

Table 2 Input data

| Parameter                              | Value                                              | Distribution | Source                                                                                                                                          |
|----------------------------------------|----------------------------------------------------|--------------|-------------------------------------------------------------------------------------------------------------------------------------------------|
| <b>Demographic</b>                     |                                                    |              |                                                                                                                                                 |
| Age                                    | 25 - 65<br>Based on distribution                   | NA           | National Statistics (INSEE)                                                                                                                     |
| CMU-c Eligibility (social status)      | 12.2 % (9.8% - 14.6%)                              | Normal       | National Health Insurance Data                                                                                                                  |
| IndScr participation periodicity       | Based on frequency distribution, age and social    | Uniform      | National Health Insurance Data                                                                                                                  |
| Initial Health State                   | Based on distribution                              | NA           | Based on model prediction for a cohort of 14-year-old women                                                                                     |
| <b>Transition probabilities</b>        |                                                    |              |                                                                                                                                                 |
| HR-HPV infection                       | 0.03 – 0.15 (0.03 – 0.18)<br>Based on distribution | Beta         | Estimated to reproduce known prevalence by age [12]                                                                                             |
| HPV-infection regression               | 0.50 (0.40 – 0.60)                                 | Beta         | Riethmuller et al. (1999)[19], Clavel et al. (2001)[20], Boulanger et al. (2004)[21], Beby-Defaux et al. (2004)[22], Dalstein et al. (2004)[23] |
| HR-HPV Infection → CIN 1               | 0.05 (0.04 – 0.06)                                 | Beta         | Moscicki et coll. (2001)[24]                                                                                                                    |
| CIN1 Regression                        | 0.50 (0.40 – 0.60)                                 | Beta         | Melnikow et coll. (1998)[25], Nobbenhuis et coll. (2001)[26], Sanders and Taira (2003)[27], Van De Velde et coll. (2007)[28]                    |
| CIN1 → CIN 2/3                         | 0.12 (0.10 – 0.14)                                 | Beta         | Melnikow et coll. (1998)[25], Sanders and Taira (2003)[27], Van De Velde et coll. (2007)[28]                                                    |
| CIN2/3 Regression                      | 0.28 (0.22 – 0.33)                                 | Beta         | Melnikow et coll. (1998)[25]                                                                                                                    |
| CIN2/3 → pCIN 2/3                      | 0.13 (0.10 – 0.15)                                 | Beta         | Melnikow et coll. (1998)[25]                                                                                                                    |
| Persistent CIN 2/3 → FIGO I            | 0.01 – 0.05 (0.01 – 0.06)<br>Based on distribution | Beta         | Estimated to reproduce known prevalence by age[1.11]                                                                                            |
| FIGO I → FIGO II                       | 0.20 (0.16 – 0.24)                                 | Beta         | Myers et al. 2000[13]                                                                                                                           |
| FIGO II → FIGO III                     | 0.26 (0.21 – 0.31)                                 | Beta         | Myers et al. 2000[13]                                                                                                                           |
| FIGO III → FIGO IV                     | 0.36 (0.29 – 0.43)                                 | Beta         | Myers et al. 2000[13]                                                                                                                           |
| FIGO I → Symptomatic FIGO I            | 0.15 (0.12 – 0.18)                                 | Beta         | Myers et al. 2000[13]                                                                                                                           |
| FIGO II → Symptomatic FIGO II          | 0.23 (0.18 – 0.27)                                 | Beta         | Myers et al. 2000[13]                                                                                                                           |
| FIGO III → Symptomatic FIGO III        | 0.60 (0.48 – 0.71)                                 | Beta         | Myers et al. 2000[13]                                                                                                                           |
| FIGO VI → Symptomatic FIGO IV          | 0.90 (0.67 - 1.00)                                 | Beta         | Myers et al. 2000[13]                                                                                                                           |
| 1-year Cancer Survival                 | 0.43 – 0.98 (0.23 – 0.99)<br>By stage              | Beta         | SEER[14]                                                                                                                                        |
| 5-year Cancer Survival                 | 0.14 – 0.94 (0.06 – 0.97)<br>By stage              | Beta         | SEER[14]                                                                                                                                        |
| 10-year Cancer Survival                | 0.05 – 0.93 (0.01 – 0.96)<br>By stage              | Beta         | SEER[14]                                                                                                                                        |
| <b>Screening</b>                       |                                                    |              |                                                                                                                                                 |
| Participation after invitation         | 17.3% (10.0% - 24.0%)                              | Uniform      | Hamers et al. 2014[6]                                                                                                                           |
| Participation after recall             | 12.1% (5.0% - 18.0%)                               | Uniform      | Hamers et al. 2014[6]                                                                                                                           |
| Lost to follow-up with IndScr          | Based on lesion on Pap.<br>Average 27.7%           | NA           | Hamers et al. 2014[6]                                                                                                                           |
| Reduction in lost to follow-up with OS | 0.77 (0.08 – 0.77)                                 | Uniform      | OS experimentations, INCA personal communication                                                                                                |
| Lesions on PAP                         | Distribution                                       | NA           | Hamers et al. 2014[6]                                                                                                                           |
| Care per lesion                        | Distribution                                       | NA           | Hamers et al. 2014[6]                                                                                                                           |

|                                           |                                |         |                                                                                   |
|-------------------------------------------|--------------------------------|---------|-----------------------------------------------------------------------------------|
| Primary Pap-test (Se)                     | 70.0 % (57.0 % - 80.0 %)       | Beta    | Mustafa <i>et al.</i> (2015)[15]                                                  |
| Confirmation Pap-test after HPV+ (Se)     | 85.9 % (76.6 % - 92.1 %)       | Beta    | Bergeron <i>et al.</i> (2015)[9]                                                  |
| Primary HPV-test (Se)                     | 94.0 % (89.0 % - 97.0 %)       | Beta    | Mustafa <i>et al.</i> (2015)[15]                                                  |
| Confirmation HPV-test after Pap+ (Se)     | 100.0 % (NR)                   | NA      | Mayrand <i>et al.</i> (2007)[17]                                                  |
| p16/Ki67 (Se)                             | 86.7 % (81.1 % - 90.9 %)       | Beta    | Ikenberg <i>et al.</i> (2013)[16]                                                 |
| Colposcopy (Se)                           | 100.0% (NA)                    | NA      | Assumption                                                                        |
| Primary Pap-test (Sp)                     | 95.0 % (92.0 % - 97.0 %)       | Beta    | Mustafa <i>et al.</i> (2015)[15]                                                  |
| Confirmation Pap-test after HPV+ (Sp)     | 65.9 % (63.1 % - 68.6 %)       | Beta    | Bergeron <i>et al.</i> (2015)[9]                                                  |
| Primary HPV-test (Sp)                     | 90.0 % (86.0 % - 93.0 %)       | Beta    | Mustafa <i>et al.</i> (2015)[15]                                                  |
| Confirmation HPV-test after Pap+ (Sp)     | 61.1 % (NR)                    | NA      | Mayrand <i>et al.</i> (2007)[17]                                                  |
| p16/Ki67 (Sp)                             | 95.2 % (94.9 % - 95.4 %)       | Beta    | Ikenberg <i>et al.</i> (2013)[16]                                                 |
| Colposcopy (Sp)                           | 100.0% (NA)                    | NA      | Assumption                                                                        |
| Conisation efficacy                       | 95.0%                          | NA      | Assumption                                                                        |
| Non-interpretable tests                   | 1.0% (1.0% - 3.0%)             | Uniform | Hamers <i>et al.</i> 2014[6]                                                      |
| <b>Costs (€)</b>                          |                                |         |                                                                                   |
| Pap-test (IndScr)                         | 47.78 (38.88 – 57.59)          | Gamma   | National tarrifs                                                                  |
| Pap-test (OS)                             | 49.62 (40.37 – 59.81)          | Gamma   | National tarrifs                                                                  |
| p16/Ki67 (IndScr)                         | 86.77 (70.60 - 104.58)         | Gamma   | National tarrifs                                                                  |
| p16/Ki67 (OS)                             | 88.61 (72.09 - 106.80)         | Gamma   | National tarrifs                                                                  |
| HPV-test (IndScr)                         | 47.70 (75.48 - 97.17)          | Gamma   | National tarrifs                                                                  |
| HPV-test (OS)                             | 49.54 (49.54 - 71.24)          | Gamma   | National tarrifs                                                                  |
| Confirmation Pap-test (IndScr)            | 78.17 (63.60 - 94.21)          | Gamma   | National tarrifs                                                                  |
| Confirmation Pap-test (OS)                | 49.63 (40.38 - 59.82)          | Gamma   | National tarrifs                                                                  |
| Confirmation p16/Ki67 (IndScr)            | 116.77 (78.09 - 99.57)         | Gamma   | National tarrifs                                                                  |
| Confirmation p16/Ki67 (OS)                | 88.23 (71.79 - 106.34)         | Gamma   | National tarrifs                                                                  |
| Confirmation HPV-test (IndScr)            | 78.09 (63.53 - 94.12)          | Gamma   | National tarrifs                                                                  |
| Confirmation HPV-test (OS)                | 49.55 (49.55 - 71.03)          | Gamma   | National tarrifs                                                                  |
| Colposcopy                                | 49.82 (40.54 - 60.05)          | Gamma   | National tarrifs                                                                  |
| Conization                                | 93.42 (76.01 - 112.60)         | Gamma   | National tarrifs                                                                  |
| FIGO I CC treatment                       | 1041.95 (847.77 - 1255.85)     | Gamma   | Dervaux <i>et al.</i> 2007[12]                                                    |
| FIGO II CC treatment                      | 1818.86 (1479.90 - 2192.25)    | Gamma   | Dervaux <i>et al.</i> 2007[12]                                                    |
| FIGO III CC treatment                     | 25817.84 (21006.43 - 31117.97) | Gamma   | Dervaux <i>et al.</i> 2007[12]                                                    |
| FIGO IV CC treatment                      | 30582.83 (24883.41 - 36861.16) | Gamma   | Dervaux <i>et al.</i> 2007[12]                                                    |
| Database management + Invitation dispatch | 7.00 (4.00 – 11.00)            | Gamma   | Cost of invitation to colorectal OS (Heath Ministry data, personal communication) |
| Recall dispatch                           | 0.40 (0.40 – 3.25)             | Gamma   | 50% postal charges                                                                |

## validation

The model results were compared to observed epidemiological data for validation. The model faithfully reproduces cancer incidence and CC mortality in France.[12] Results of the model validation are available in a supplementary appendix.

## analyses

Incremental cost-effectiveness ratios (ICER) were calculated for the life expectancy. Costs and survival were discounted at 4% per year, according to French guidelines for cost-effectiveness studies.[18]

Several alternative scenarios were tested, including not applying the efficacy of OS on LtfU rate, not considering a reduction in HPV cost, and assuming a 60% reduction in p16/Ki67 cost.

The robustness of the model was tested using deterministic sensitivity analysis (DSA). In the DSA, all of the parameters were tested at their confidence intervals (or at  $\pm 20\%$  of the baseline value when the confidence intervals were not available).

## RESULTS

Compared with the current situation, invitation and recall (Pap/Pap) led to an increase from 61.9% to 65.5% in the 4-year participation rate. Every strategy that was tested was associated with a reduction in cancer incidence/mortality, ranging from -14.2%/-13.5% for the Pap/Pap strategy to -22.9%/-25.8% for the HPV/p16Ki67-5y strategy. The undiscounted results are presented in table 3.

Table 3 Undiscounted results

| Scenario        | Outcomes |                  |                 | Costs (€) per woman |                       |         |
|-----------------|----------|------------------|-----------------|---------------------|-----------------------|---------|
|                 | Cancer   | Cancer mortality | OS organisation | Screening           | CC care & conizations | Total   |
| IndScr only*    | 34       | 13               | 0               | 294.2               | 30.9                  | 325.0   |
| Pap/Pap         | -14.2%   | -13.5%           | +19.57          | +13.32              | -3.92                 | +28.97  |
| Pap/p16Ki67     | -16.6%   | -15.9%           | +19.57          | +18.46              | -4.57                 | +33.46  |
| HPV/Pap-3y      | -21.1%   | -22.4%           | +15.16          | +99.87              | -7.31                 | +107.73 |
| HPV/Pap-5y      | -18.9%   | -22.5%           | +15.12          | -29.79              | -7.24                 | -21.91  |
| HPV/Pap-10y     | -8.0%    | -13.6%           | +14.94          | -14.42              | -0.48                 | -134.04 |
| HPV/p16Ki67-5y  | -22.9%   | -25.8%           | +15.10          | +1.57               | -0.81                 | +8.55   |
| HPV/p16Ki67-10y | -11.9%   | -17.0%           | +14.93          | -129.7              | -5.87                 | -120.63 |
| p16Ki67/p16Ki67 | -24.3%   | -24.4%           | +19.57          | +233.30             | -6.87                 | +246.00 |

\*Reference for other scenarios. Cumulated incidence and mortality for 10,000 women eligible for OS on a lifetime horizon.

The average undiscounted cost of screening for the modelled population over a lifetime was €325 per eligible woman, most of which was imputable to screening (€294). Strategies based on HPV-testing with 5-year and 10-year frequencies were cost-saving (-€22 and -€134 per woman, respectively), despite the additional cost of OS (€15). Other strategies were responsible for extra costs, ranging from €29 to €33 for Pap-based screening to €108 for HPV/Pap-3y and €246 for p16Ki67/p16Ki67.

Although it was the cheapest strategy (€191 per eligible woman), HPV/Pap-10y was the strategy with the smallest cancer reduction (-11.9%), as opposed to p16Ki67/p16Ki67, which led to a 25% reduction in CC while being the most expensive strategy (€571 per eligible woman). Figure 2 presents the mean cost per woman and cancer reduction rate for each strategy.

Discounted survival is consistent with CC incidence and mortality (table 4). Compared to the current situation (19.4 LY survival), OS strategies led to an increase in survival, ranging from 10 years per

10,000 women for the Pap/Pap and HPV/Pap-10y strategies to 18 years per 10,000 women for the HPV/p16Ki67 and p16Ki67/p16Ki67 strategies. Discounted extra costs per 10,000 eligible women ranged from €38,000 (HPV/Pap-5y) to €1,608,000 (p16Ki67/p16Ki67). HPV/Pap-5y and HPV/Pap-10y remained cost-saving after discounting. Hence, these strategies were more effective and more cost-saving than Pap-based strategies, including the current situation, and were the dominant OS strategies. HPV/p16Ki67-5y and p16Ki67/p16Ki67 were more effective than HPV/Pap-5y and HPV/Pap-10y with ICERs of €101,391 and €6,541,250 per LY, respectively. HPV/Pap-3y was as effective as HPV/Pap-5y but less effective than HPV/p16Ki67-5y while generating much more expenses.

Table 4 Discounted results

| Scenario        | Survival (LY) | Total cost (K€) | ICER (€/LY) vs current | Frontier       |
|-----------------|---------------|-----------------|------------------------|----------------|
| IndScr only*    | 19.4          | 122.6           | Reference              | Dominated      |
| Pap/Pap-HPV     | +10.04        | +22.3           | 22,234                 | Dominated      |
| Pap/p16Ki67     | +11.68        | +25.5           | 21,918                 | Dominated      |
| HPV/Pap-3y      | +15.93        | +55.8           | 35,095                 | Dominated      |
| HPV/Pap-5y      | +15.89        | -13.3           | Dominant               | Ext. Dominated |
| HPV/Pap-10y     | +10.51        | -73.4           | Dominant               | Reference      |
| HPV/p16Ki67-5y  | +18.13        | +3.79           | 2,091                  | 101,389        |
| HPV/p16Ki67-10y | +13.00        | -64.6           | Dominant               | 35,846         |
| p16Ki67/p16Ki67 | +18.37        | +160.7          | 87,546                 | 6,592,441      |

\*Reference for other scenarios. Extra-survival per 10,000 women eligible for OS on a lifetime horizon. LY: Life Years

Regardless of the modality, implementing an OS programme for cervical cancer in France led to an overall improvement in the CC screening rate and a reduction in CC incidence and mortality. Reducing LtFU rates and improving screening rates with invitations/recall as in the Pap/Pap scenario results in an ICER of €22,231 per LY and an average extra survival of 10 LY per 10,000 eligible women.

Switching primary screening from the Pap-test to HPV-testing led to similar LY gains with a 10-year screening frequency, yet the 5-year frequency led to a longer survival (15.89 vs. 10.51 LY per 10,000 eligible women). Furthermore, reducing the frequency of primary testing was cost-saving, even at the current cost of HPV-testing. Despite the longer interval between the two screening tests, HPV-based strategies remained effective because of their superior sensitivity compared to the Pap-test.

The very good sensitivity/specificity of p16/Ki67 double-staining used as a primary screening test led to significant survival gains compared to the current situation and HPV-testing (+18.37 and +2.48 per 10,000 eligible women, respectively). However, its high cost made it inefficient, with an ICER of €6,592,441/LY.

Switching the Pap test with p16/Ki67 double-staining in the confirmation of positive Pap and HPV primary tests increased efficacy and led to moderate additional costs. The confirmation of HPV tests every 10 years increased the survival from +10.51 to +13.0 LY and the costs from -€734,000 to -€646,000 per 10,000 eligible women. Thus, the HPV/p16Ki67-10y scenario was associated with an ICER of €35,846/LY. The cost-utility results do not lead to different conclusions. A cost-utility analysis was performed by applying specific health utilities to the health states and utility decrements to non-cancerous and cancerous states. Its results and the utility values used are available in a supplementary appendix.

### sensitivity and scenario analyses

Deterministic sensitivity analysis and scenario analyses for HPV/Pap-10y versus the current situation for LY and costs are shown in figures 3 and 4, respectively.

1  
2  
3 The parameters with the biggest impact were the cost of testing (HPV and Pap) and OS effect on LtFU  
4 rate after a positive result. However, HPV/Pap-10y systematically remained the most cost-effective  
5 alternative. The mean age of the cohort impacted results drastically, despite HPV screening being  
6 less beneficial in women under 30 years old and over 50 years old than in the rest of the eligible  
7 population. Vaccination rates up to 80% had a negligible impact. Similar results were seen for  
8 HPV/Pap-5y and HPV/p16Ki67-5y scenarios. Not taking into account the effect of OS on LtFU rate did  
9 not change the conclusion, although it significantly reduced the LY gains compared to in the IndScr  
10 only. Similarly, not considering a reduction in the cost of the HPV test led to similar conclusions:  
11 HPV/Pap-10y and HPV/Pap-5y remained less costly than the alternative strategies. Finally, a 60%  
12 reduction in p16/Ki67 cost led to a decreased total cost of €41.05 (-75%) for the p16Ki67/p16Ki67  
13 scenario.  
14  
15

## 16 DISCUSSION

17 Using a comprehensive, validated microsimulation model that allows for the fine modelling of CC  
18 natural history and screening modalities, we showed that the OS programme for cervical cancer in  
19 France leads to a reduction of CC incidence and mortality. HPV-based screening with 5- or 10-year  
20 frequencies would be cost-saving, and other modalities would generate extra costs ranging between  
21 €37.9 and €1,607 per woman.  
22  
23

24 Most model inputs were based on observed “real-life” data instead of simple screening guidelines.  
25 This allows for an accurate simulation of women’s screening behaviour by considering that many  
26 women do not comply with the recommended screening frequency and that older women tend to  
27 drop out of screening.[3] This also allowed for the implementation of current professional practices  
28 that significantly differ from recommended screening algorithms: in the current IndScr only situation,  
29 after a positive Pap test, not all women proceed to confirmation (Pap or HPV test), as some directly  
30 undergo colposcopy or conization, depending on the identified lesion with a significant impact on  
31 IndScr efficiency. Finally, the model incorporates LtFU rates, which proved to be a key factor in OS  
32 efficacy, particularly when screening frequency was superior to 5 years.[6]  
33  
34

35 The model’s main limitations stem from the estimation of the TP. An initial literature review showed  
36 important variations between sources with some TP being not available. Additionally, the identified  
37 TP were not precise enough given the low incidence of lesions in the general population of women (1  
38 in 10,000). Thus, we favoured sources that had previously been used in French models to allow  
39 comparability with previously published results.[10.12] Additionally, the model was calibrated on  
40 available prevalence data in France and externally validated. Furthermore, the sensitivity analyses  
41 showed that, despite the uncertainty, TP variations had a limited impact on the results, which  
42 reinforces our confidence in the estimations. Finally, our results are comparable to previously  
43 published European studies: Accetta *et al.* have found that an HPV test every 5 years is more  
44 effective and less costly than triennial Pap-tests in Italy.[29] The decreased efficiency of CC screening  
45 based on the HPVtest at lower frequencies was shown by Berkhof *et al.* in the Netherlands.[30] In  
46 Norway, Burger *et al.* found results comparable to ours for the Pap/Pap strategy.[31]  
47  
48  
49

50 In our analysis, HPV/Pap-10y was the most efficient strategy, with HPV/p16Ki67-10y being a more  
51 cost-effective alternative. However, the final modality choice for OS-implementation will need to  
52 consider several factors. First, the HPV/Pap-10y strategy, albeit the most efficient, is the less  
53 effective strategy in terms of cancer incidence and prevalence reduction, conflicting with the primary  
54 aim of the Cancer Plan to further reduce the CC burden in France [5] and thus making the HPV/Pap-  
55 5y a more suitable, cost-saving modality. Second, current screening behaviours in France result in  
56 over-participation, with numerous women performing Pap-tests more often than is recommended.  
57 This phenomenon is likely to be related to the yearly recommended consultation with a  
58  
59  
60

1  
2  
3 gynaecologist. Our results showed that going from a 5-year frequency to a 3-year frequency implies a  
4 huge increase in screening cost (from -€133,000 to +€558,000 per 10,000 eligible women) for a very  
5 small increase in survival (from 15.89 to 15.93). Indeed, HPV-testing is sensitive, but it has a low  
6 specificity and cervical lesion evolution is slow, with most lesions regressing spontaneously. Women's  
7 over-participation will thus be a challenge in the case of HPV-based OS implementation. This should  
8 be addressed beforehand, or these apparent efficient strategies would be poorly efficient, leading to  
9 frequent false-positive results and related unnecessary and potentially harmful testing. Third, HPV-  
10 testing is not recommended in women under 35 years of age, which would require a complex double  
11 screening system. Finally, the current screening organization in France is based on the Pap-test,  
12 which implies a different infrastructure. Switching to HPV would require the negotiation of HPV-test  
13 tariffs, the development of a quality assurance protocol to ensure a sensitivity that is consistent with  
14 those found during clinical studies, as well as the development of the required infrastructure and  
15 equipment. Thus, although primary HPV-testing produces results with a better efficiency, many  
16 challenges will need to be addressed before its implementation. In the meantime, switching to a Pap-  
17 test based OS remains an acceptable alternative and could lead the way to HPV-testing deployment.

21 As for p16/KI67 double-staining, our results show that it would be an efficient confirmation test or  
22 primary test with negotiated tariffs. However, the sensitivity and specificity of the test were based on  
23 a single study with centralized reading. Additional studies in different French settings would be  
24 required to confirm that the results are reproducible before generalization.

26 In summary, this modelling study enabled the INCa to provide robust information to support a public  
27 decision on both efficient intermediate modalities for implementation of the CC OS programme and  
28 also on optimal screening strategies in a longer term and to anticipate the integration of promising  
29 technological innovations.  
30  
31  
32  
33  
34  
35  
36  
37  
38  
39  
40  
41  
42  
43  
44  
45  
46  
47  
48  
49  
50  
51  
52  
53  
54  
55  
56  
57  
58  
59  
60



**Funding**

This work was entirely funded by the National Cancer Institute.

**Declaration of interests**

The authors have no conflict of interest to declare concerning this study.

**Authorship Statement**

All authors participated in the study. Barré S, Leleu H and Massetti M participated in model development, data analysis and drafting of the manuscript. Barré S and De Bels F made critical review of the manuscript and approved its final version.

**Notes/Acknowledgments**

The authors acknowledge the members of the Scientific Committee for study for their critical review of the methodological choices, discussion of the results and conclusions of this medico-economic evaluation study:

Pr Jean Jacques Baldauf (Centre hospitalier universitaire de Strasbourg), Dr Anne Sophie Banaszuk (Structure de gestion du Maine et Loire), Nathalie Beltzer (Santé Publique France), Dr Mohamed-Béchir Ben Hadj Yahia (Centre hospitalier régional universitaire de Lille), Julia Bonastre (Institut Gustave Roussy), Dr Véronique Dalstein (Centre hospitalier universitaire Reims), Dr Marie Flori (Université de Lyon 1), Julie Gaillot (Institut National du Cancer), Chrystelle Gastaldi-Ménager (Caisse nationale d'assurance maladie des travailleurs salariés), Ken Haguenoer (Centre hospitalier régional universitaire de Tours), Françoise Hamers (Santé Publique France), Guy Launoy (Centre hospitalier universitaire de Caen, Inserm), Patricia Lucidarne (Collège national des sages-femmes), Emmanuel Ricard (Ligue Nationale contre le cancer), Jean-Paul Romarin (Agence régionale de santé du Languedoc-Roussillon Midi-Pyrénées), Catherine Rumeau-Pichon (Haute Autorité de Santé), Emmanuelle Salines (Ministère de la Santé) Nadia Thomas (Structure de gestion de Guyane), Alain Trugeon (Observatoire régional de santé de Picardie), Hélène Vandewalle (Institut National du Cancer), Anne Sophie Woronoff (Registre des cancers du Doubs), Laura Zanetti (Haute Autorité de Santé)

## REFERENCES

1. Haute Autorité de Santé. État des lieux et recommandations pour le dépistage du cancer du col de l'utérus en France. 2010. [http://www.has-sante.fr/portail/jcms/c\\_1009772/fr/etat-des-lieux-et-recommandations-pour-le-depistage-du-cancer-du-col-de-l-uterus-en-France](http://www.has-sante.fr/portail/jcms/c_1009772/fr/etat-des-lieux-et-recommandations-pour-le-depistage-du-cancer-du-col-de-l-uterus-en-France)
2. Monnereau A, Remontet L, Maynadié, *et al.* Estimation nationale de l'incidence des cancers en France entre 1980 et 2012. Etude à partir des registres des cancers du réseau Francim - Partie 1 : tumeurs solides. 2013. <http://invs.santepubliquefrance.fr/Publications-et-outils/Rapports-et-syntheses/Maladies-chroniques-et-traumatismes/2013/Estimation-nationale-de-l-incidence-des-cancers-en-France-entre-1980-et-2012>
3. Institut National du Cancer. Généralisation du dépistage du cancer du col de l'utérus /Étude médico-économique /Phase 1. 2015. <http://www.e-cancer.fr/Expertises-et-publications/Catalogue-des-publications/Synthese-Generalisation-du-depistage-du-cancer-du-col-de-l-uterus-etude-medico-economique-Phase-1>
4. Institut de Veille Sanitaire. Vaccination rate among women under 30. 2015. Personal Communication
5. Ministère des Affaires sociales et de la santé, Ministère de l'Enseignement supérieur et de la recherche. Plan Cancer 2014-2019, Guérir et prévenir les cancers : donnons les mêmes chances à tous, partout en France. 2014. <http://www.e-cancer.fr/Plan-cancer/Plan-cancer-2014-2019-priorites-et-objectifs>
6. Hamers FF, Duport N, Beltzer N. Population-based organized cervical cancer screening pilot program in France. *Eur J Cancer Prev.* 2017 Mar 30.
7. Haguenoer K, Sengchanh S, Gaudy-Graffin C, *et al.* Vaginal self-sampling is a cost-effective way to increase participation in a cervical cancer screening programme: a randomised trial. *British journal of cancer.* 2014;111(11):2187-96.
8. Dalstein V, Charlier B, Botokey J, *et al.* Évaluation intermédiaire de START -HPV, programme pilote de dépistage primaire par test HPV des lésions précancéreuses et cancéreuses du col utérin dans le département des Ardennes, France, 2012-2013. *Bull Epidémiol Hebd.* 2014(13-14-15):254-9.
9. Bergeron C, Ikenberg H, Sideri M, *et al.* Prospective evaluation of p16/Ki-67 dual-stained cytology for managing women with abnormal Papanicolaou cytology: PALMS study results. *Cancer Cytopathol.* 2015;123(6):373-81.
10. Demarteau N, Detournay B, Tehard B, *et al.* A generally applicable cost-effectiveness model for the evaluation of vaccines against cervical cancer. *International journal of public health.* 2011;56(2):153-62.
11. Binder-Foucard F, Belot A, Delafosse P, *et al.* Estimation nationale de l'incidence et de la mortalité par cancer en France entre 1980 et 2005. Etude à partir des registres des cancers du réseau Francim - Partie 1 : tumeurs solides. 2008 <http://invs.santepubliquefrance.fr/Publications-et-outils/Rapports-et-syntheses/Maladies-chroniques-et-traumatismes/2013/Estimation-nationale-de-l-incidence-et-de-la-mortalite-par-cancer-en-France-entre-1980-et-2012>
12. Dervaux B, Lenne X, Lévy-Bruhl D, *et al.* Modélisation médico-économique de l'impact de l'organisation du dépistage du cancer du col utérin et de l'introduction de la vaccination contre les HPV dans le calendrier vaccinal. 2008. [https://www.mesvaccins.net/textes/rapport\\_modelisation\\_hpv.pdf](https://www.mesvaccins.net/textes/rapport_modelisation_hpv.pdf)

- 1  
2  
3 13. Myers E R, McCrory D C, Nanda K, *et al*. Mathematical model for the natural history of human  
4 papillomavirus infection and cervical carcinogenesis. *American journal of epidemiology*.  
5 2000;151(12):1158-71.  
6
- 7 14. Wright J D, Chen L, Tergas A I, *et al*. Population-level trends in relative survival for cervical  
8 cancer. *Am J Obstet Gynecol*. 2015.  
9
- 10 15. Mustafa R A, Santesso N, Khatib R, *et al*. Systematic reviews and meta-analyses of the  
11 accuracy of HPV tests, visual inspection with acetic acid, cytology, and colposcopy. *Int J Gynaecol*  
12 *Obstet*. 2016;132(3):259-65.  
13
- 14 16. Ikenberg H, Bergeron C, Schmidt D, *et al*. Screening for cervical cancer precursors with  
15 p16/Ki-67 dual-stained cytology: results of the PALMS study. *Journal of the National Cancer Institute*.  
16 2013;105(20):1550-7.  
17
- 18 17. Mayrand M. H, Duarte-Franco E, Rodrigues I, *et al*. Human papillomavirus DNA versus  
19 Papanicolaou screening tests for cervical cancer. *N Engl J Med*. 2007;357(16):1579-88.  
20
- 21 18. Haute Autorité de Santé. Choix méthodologiques pour l'évaluation médico-économique à la  
22 HAS. 2011. [http://www.has-sante.fr/portail/upload/docs/application/pdf/2011-](http://www.has-sante.fr/portail/upload/docs/application/pdf/2011-11/guide_methodo_vf.pdf)  
23 [11/guide\\_methodo\\_vf.pdf](http://www.has-sante.fr/portail/upload/docs/application/pdf/2011-11/guide_methodo_vf.pdf)  
24
- 25 19. Riethmuller D, Gay C, Bertrand X, *et al*. Genital human papillomavirus infection among  
26 women recruited for routine cervical cancer screening or for colposcopy determined by Hybrid  
27 Capture II and polymerase chain reaction. *Diagn Mol Pathol*. 1999;8(3):157-64.  
28
- 29 20. Clavel C, Masure M, Bory J P, *et al*. Human papillomavirus testing in primary screening for the  
30 detection of high-grade cervical lesions: a study of 7932 women. *British journal of cancer*.  
31 2001;84(12):1616-23.  
32
- 33 21. Boulanger J C, Sevestre H, Bauville E, *et al*. [Epidemiology of HPV infection]. *Gynecol Obstet*  
34 *Fertil*. 2004;32(3):218-23.  
35
- 36 22. Beby-Defaux A, Bourgoin A, Ragot S, *et al*. Human papillomavirus infection of the cervix uteri  
37 in women attending a Health Examination Center of the French social security. *Journal of medical*  
38 *virology*. 2004;73(2):262-8.  
39
- 40 23. Dalstein V, Riethmuller D, Sautiere J L, *et al*. Detection of cervical precancer and cancer in a  
41 hospital population; benefits of testing for human papillomavirus. *European journal of cancer*  
42 (Oxford, England : 1990). 2004;40(8):1225-32.  
43
- 44 24. Moscicki A B, Hills N, Shiboski S, *et al*. Risks for incident human papillomavirus infection and  
45 low-grade squamous intraepithelial lesion development in young females. *Jama*. 2001;285(23):2995-  
46 3002.  
47
- 48 25. Melnikow J, Nuovo J, Willan A R, *et al*. Natural history of cervical squamous intraepithelial  
49 lesions: a meta-analysis. *Obstetrics and gynecology*. 1998;92(4 Pt 2):727-35.  
50
- 51 26. Nobbenhuis M A, Helmerhorst T J, van den Brule A J, *et al*. Cytological regression and  
52 clearance of high-risk human papillomavirus in women with an abnormal cervical smear. *Lancet*.  
53 2001;358(9295):1782-3.  
54
- 55 27. Sanders G D, Taira A V. Cost-effectiveness of a potential vaccine for human papillomavirus.  
56 *Emerg Infect Dis*. 2003;9(1):37-48.  
57  
58  
59  
60

- 1  
2  
3 28. Van de Velde N, Brisson M, Boily M C Modeling human papillomavirus vaccine effectiveness:  
4 quantifying the impact of parameter uncertainty. *American journal of epidemiology*.  
5 2007;165(7):762-75.  
6  
7 29. Accetta G, Biggeri A, Carreras G, *et al*. Is human papillomavirus screening preferable to  
8 current policies in vaccinated and unvaccinated women? A cost-effectiveness analysis. *Journal of*  
9 *medical screening*. 2010;17(4):181-9.  
10  
11 30. Berkhof J, Coupe V M, Bogaards J A, *et al*. The health and economic effects of HPV DNA  
12 screening in The Netherlands. *International journal of cancer Journal international du cancer*.  
13 2010;127(9):2147-58.  
14  
15 31. Burger E A, Kim J J. The value of improving failures within a cervical cancer screening  
16 program: an example from Norway. *International journal of cancer Journal international du cancer*.  
17 2014;135(8):1931-9.  
18  
19  
20  
21  
22  
23  
24  
25  
26  
27  
28  
29  
30  
31  
32  
33  
34  
35  
36  
37  
38  
39  
40  
41  
42  
43  
44  
45  
46  
47  
48  
49  
50  
51  
52  
53  
54  
55  
56  
57  
58  
59  
60

1  
2  
3  
4  
5  
6  
7  
8  
9  
10  
11  
12  
13  
14  
15  
16  
17  
18  
19  
20  
21  
22  
23  
24  
25  
26  
27  
28  
29  
30  
31  
32  
33  
34  
35  
36  
37  
38  
39  
40  
41  
42  
43  
44  
45  
46  
47  
48  
49  
50  
51  
52  
53  
54  
55  
56  
57  
58  
59  
60

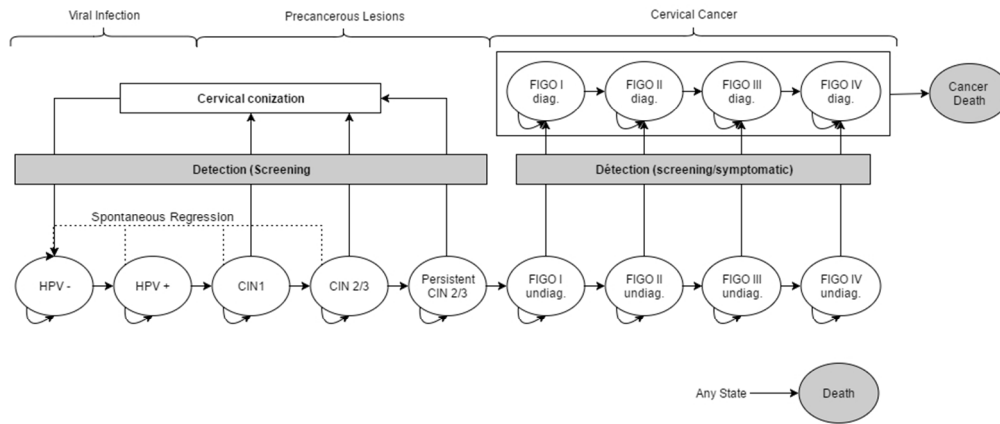

Structure of the model for the natural history of cervical cancer

269x113mm (96 x 96 DPI)

Peer review only

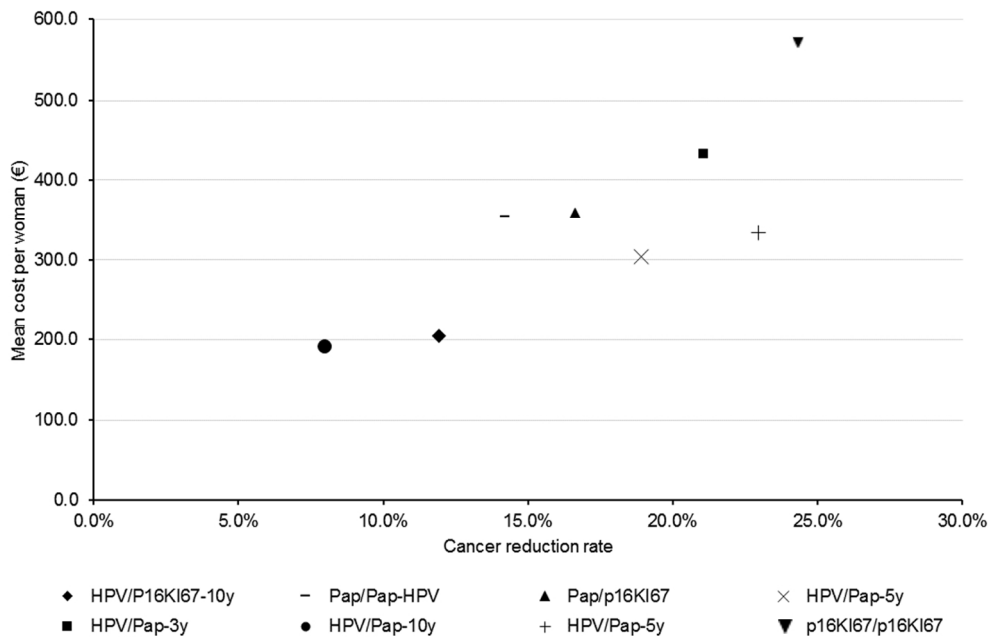

Impact of OS strategies assessed on cancer reduction rate and associated mean cost

372x237mm (96 x 96 DPI)

Review only

1  
2  
3  
4  
5  
6  
7  
8  
9  
10  
11  
12  
13  
14  
15  
16  
17  
18  
19  
20  
21  
22  
23  
24  
25  
26  
27  
28  
29  
30  
31  
32  
33  
34  
35  
36  
37  
38  
39  
40  
41  
42  
43  
44  
45  
46  
47  
48  
49  
50  
51  
52  
53  
54  
55  
56  
57  
58  
59  
60

1  
2  
3  
4  
5  
6  
7  
8  
9  
10  
11  
12  
13  
14  
15  
16  
17  
18  
19  
20  
21  
22  
23  
24  
25  
26  
27  
28  
29  
30  
31  
32  
33  
34  
35  
36  
37  
38  
39  
40  
41  
42  
43  
44  
45  
46  
47  
48  
49  
50  
51  
52  
53  
54  
55  
56  
57  
58  
59  
60

Results of DSA and scenario analyses with the biggest impact on survival for organised screening by invitation and recall of non-participant eligible women to perform a HPV-test every 10 years (Pap-test confirmation) versus current situation

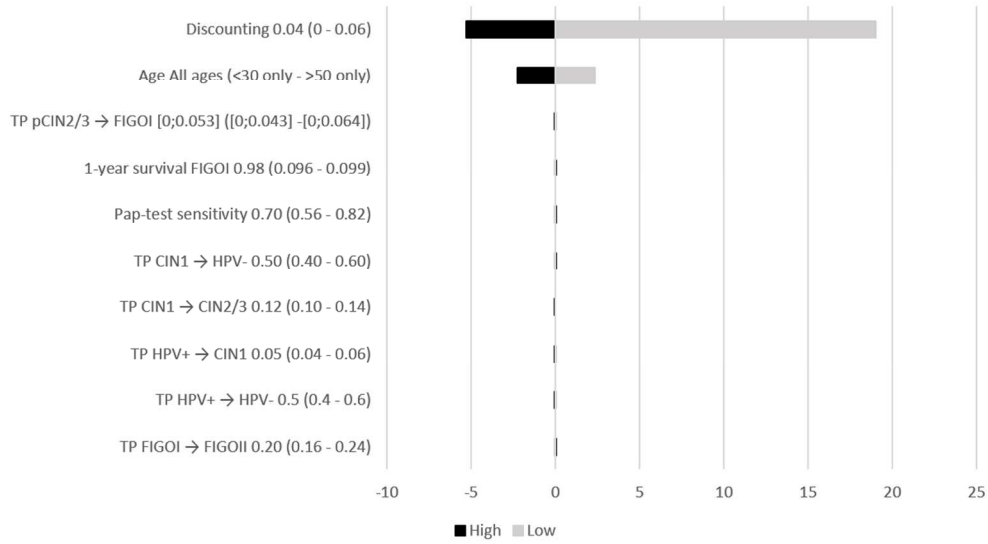

Tornado diagram of DSA and scenario analyses with the biggest impact on survival for HPV/Pap-10y versus current situation

320x211mm (96 x 96 DPI)

View only

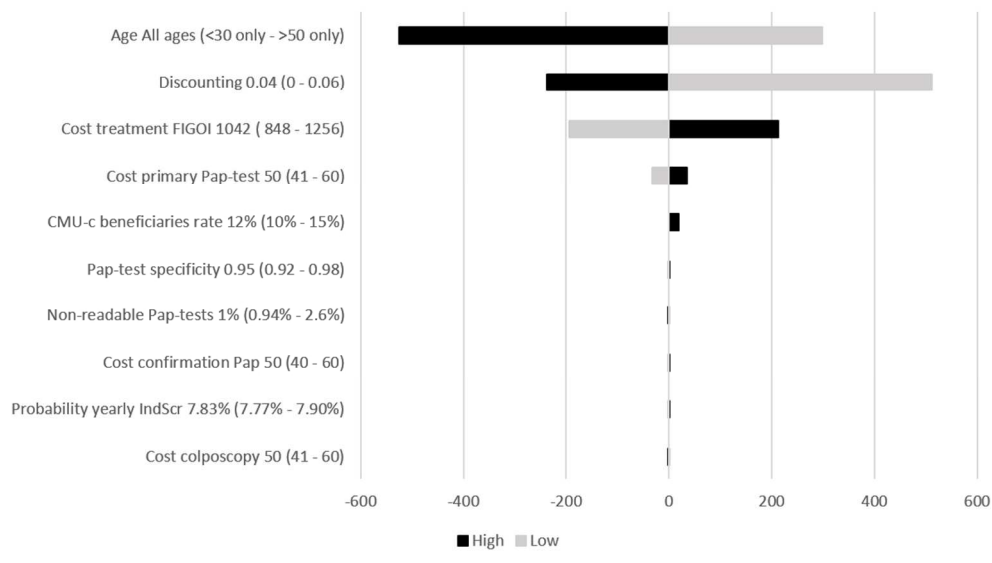

Tornado diagram of DSA and scenario analyses with the biggest impact on costs for HPV/Pap-10y versus current situation

319x184mm (96 x 96 DPI)

Review only



1  
2  
3  
4  
5  
6  
7  
8  
9  
10  
11  
12  
13  
14  
15  
16  
17  
18  
19  
20  
21  
22  
23  
24  
25  
26  
27  
28  
29  
30  
31  
32  
33  
34  
35  
36  
37  
38  
39  
40  
41  
42  
43  
44  
45  
46  
47  
48  
49  
50  
51  
52  
53  
54  
55  
56  
57  
58  
59  
60

# Supplementary

## File 1 Screening algorithms

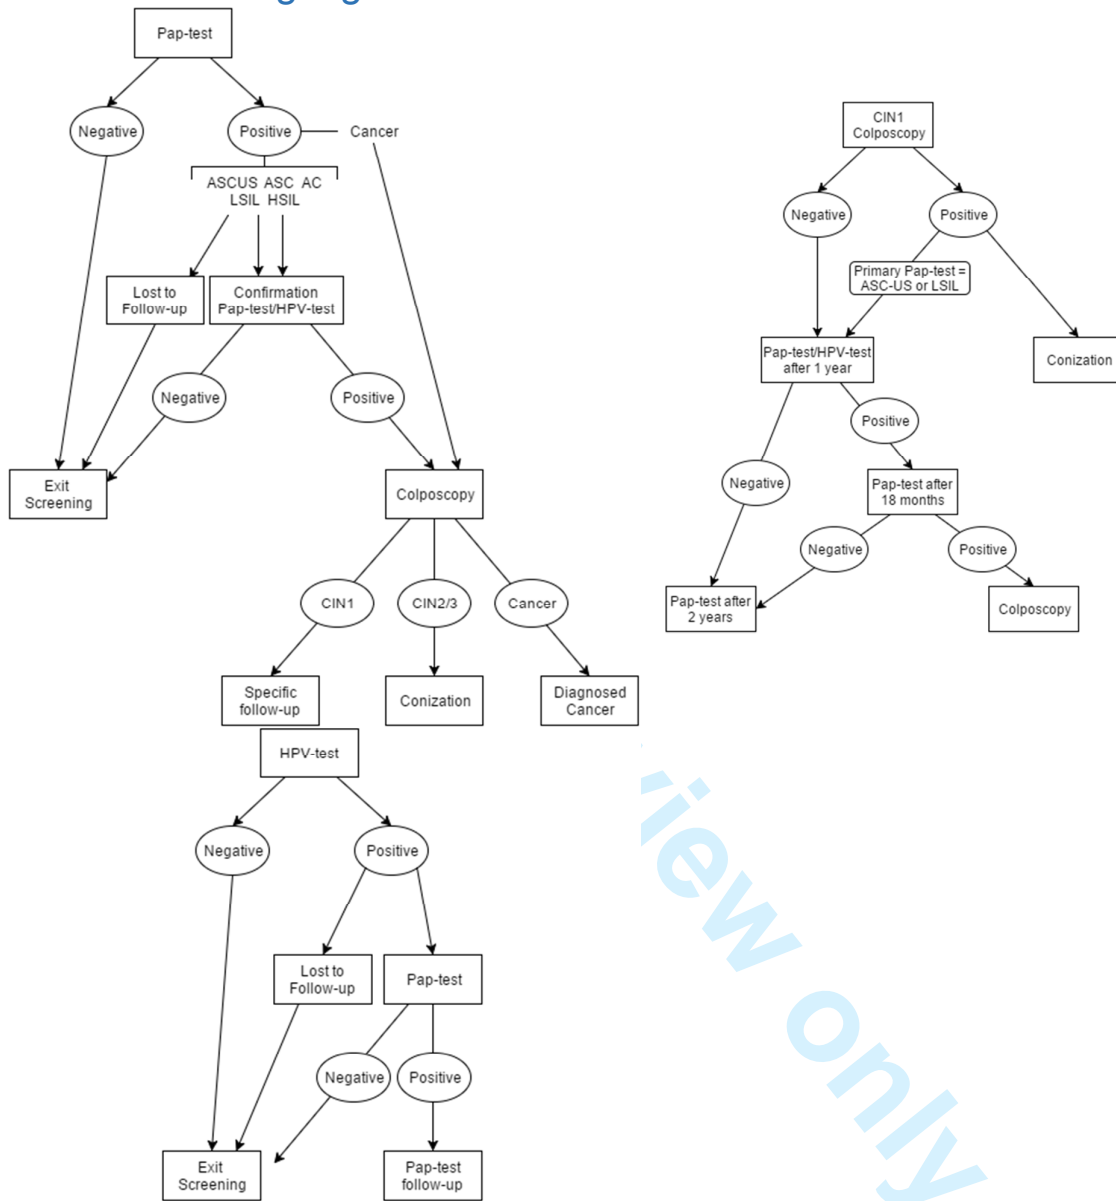

view only

## File 2 Extended model presentation

Due to the complexity of screening algorithms and screening pace depending on the women's history and interactions that exist between screening and individual characteristics, a stochastic microsimulation model based on a Markov methodology and a 1-year cycle length was adapted based on a previously published Markov cohort-based model that has been updated.

Given the importance of individual characteristics, the analysis is based on the simulation of closed cohorts of women eligible for CC screening and representative in terms of age, HPV infection and precancerous and cancerous lesions in order to assess the actual cost-effectiveness of SO implementation in eligible women. Therefore, the results of the model specifically address the efficiency of the various OS strategies assessed and do not allow for epidemiological prediction.

According to the French national health authority (HAS), the model perspective is the collective perspective, meaning that costs borne by all payers are taken into consideration. Costs and survival results are discounted at a 4% annual rate.

The model is programmed in C++. Input data and scenario definition are entered through a Microsoft Excel interface. Model results are then exported to Excel to generate the figures and tables.

### Women generation

The model first generates women with the following characteristics: age (25-56), participant in IndScr, period between carrying out two voluntary IndScr, health state at model initiation and vaccination status. Due to the recent introduction of vaccination, only women aged under 30 can be vaccinated.

### Natural history of CC

Women then initiate the simulation of CC's natural history. At each cycle, non-HPV-infected women can become infected. This infection can spontaneously regress or progress and lead to grade 1 cervical intraepithelial neoplasia (CIN 1). CIN1 lesions can become pre-cancerous (grades 2 and 3 cervical intraepithelial neoplasia, CIN2/3). Once CIN 2/3 lesions have become persistent, they cannot regress spontaneously any longer and can only progress to cancerous lesions of first grade, based on the International Federation of Gynecology and Obstetrics (FIGO) classification. FIGO I CC can progress to grades 2, 3 and 4 and/or become symptomatic, leading to diagnosis of the CC and treatment initiation. Cancer mortality based on cancer severity grade and time since diagnosis is applied to women with symptomatic/diagnosed cancer. Women can die of age-specific general mortality at any state. See figure 1 for the structure of the model.

Considering the age distribution of the cohort and its low adoption in France (17% of women under 30), the effect of vaccination is simulated by applying a relative risk of infection by oncogenic HPV to vaccinated women (i.e. herd immunity is not considered).

### Screening

Each year, the model determines whether the simulated woman performs IndScr based on her status (participant in IndScr or not) and her specific IndScr frequency, both parameters generated at the initiation and updated throughout the simulation. If the woman has not performed a CC screening or received an OS invitation/recall for a period that exceeds the OS periodicity, she receives an invitation to participate. Women that are still NP receive a recall during the same cycle.

Invitation and recall modalities determine different participation probabilities upon receiving. During the screening cycle, IndScr and OS participants perform the screening test determined by the OS

strategy assessed. Test characteristics (sensitivity/specificity) and the screening algorithm determine the result of the primary screening test based on the actual health state of the woman as well as the follow-up actions in case of positive results. Follow-up includes confirmation tests, colposcopy and conizations. Some women become lost to follow-up. Women diagnosed with CC switch to the corresponding diagnosed state.

### Women's characteristics

The modelled population corresponds to all women aged 25 to 65, that is, all women eligible for IndScr according to current recommendations. Age distribution within the population is based on the national statistics office (INSEE) data.

Twelve percent (12.2%) of the eligible women were found to benefit from the universal complementary health insurance (CMU-c) in an analysis of a representative sample of the French SHI general regimen (employees). Vaccination rate among women aged 25 was based on the last available data which found a 17% uptake among young women since the vaccine became available. Distribution of each modelled health state by age within the population was based on the results of the simulation of a cohort of 14-year-old women. Health-state distribution in the generated cohort at each age is presented in the figure below.

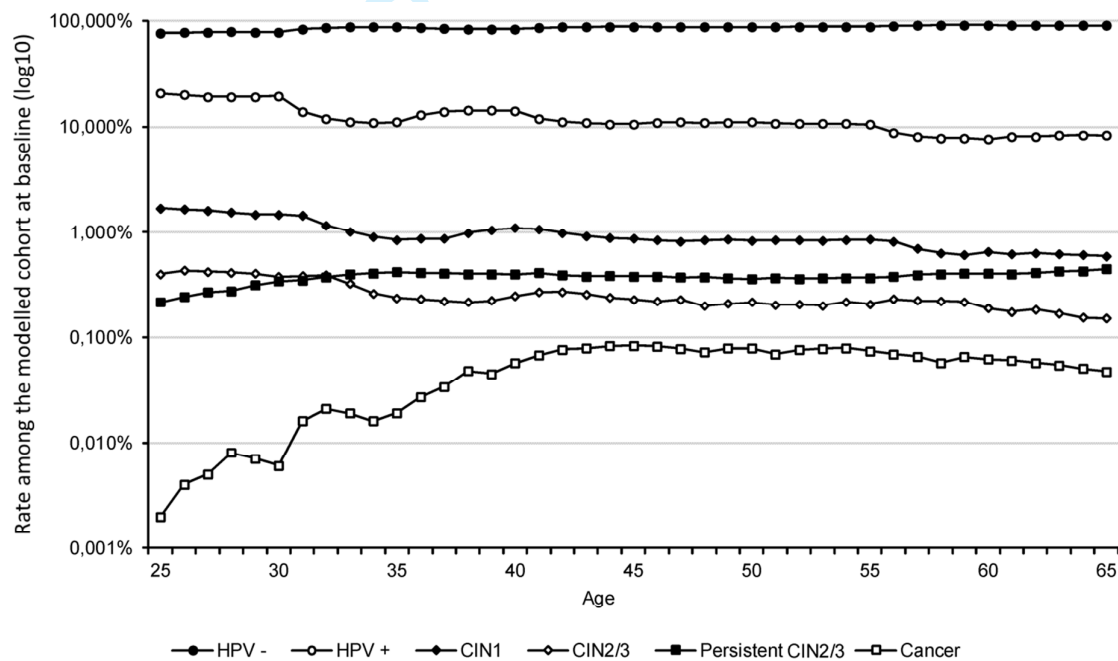

In scenarios based on Pap-test and p16/Ki67, IndScr participation is determined based on the analysis of a sample of the SHI general regimen: at 4 years, 61.9% of eligible women were found to be participants. At patient generation, a relative risk (RR) of participation is applied to account for the impact of age and universal complementary health insurance (CMU-c). Another analysis of the same dataset provided the observed period between two IndScr (annual to every 10 years, see Supplementary file 3).

Each woman is associated with a SI participation status (Yes/No) and a screening period. Age-dependent probabilities of becoming NP are applied throughout the simulation to account for the lesser participation among older women. These probabilities are determined as follows:

$$P_{\text{become non-participant}} = (RR_{\text{next age-group}} / RR_{\text{current age-group}}) / 5$$

### Transition probabilities

High risk (HR) HPV annual infection rate was estimated to vary from 3.5% and 14% depending on age, in order to fit with the observed HR-HPV prevalence, considering a 50% annual viral clearance rate, according to the model developed by Demarteau *et al.* In younger women, vaccination is modelled through the application of a relative risk of infection taking into account the vaccination rate and decreased infection risk among vaccinated women.

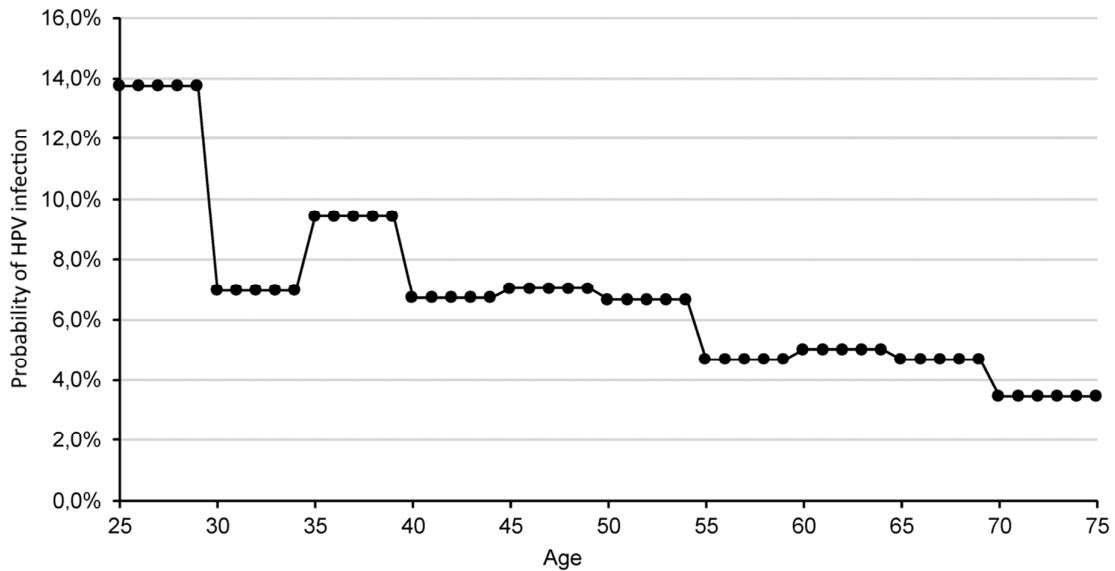

Annual transition probabilities that determine the odds of progression from HPV infection to persistent CIN2/3 precancerous lesion are replicated from the model developed by Demarteau *et al.* and presented in table 2.

Considering the lack of appropriate data, the age-specific progression transition probability of persistent CIN2/3 to FIGO I CC was estimated by calibrating the model to the CC incidence data available. The calibration process consisted in the simulation of a cohort of 14-year-old women, taking the observed IndScr participation rate into account. Transition probabilities were adjusted within a plausible interval in order to duplicate the observed incidence of CC by age. The following figures respectively present the results of the calibration process and the resulting persistent CIN 2/3 to FIGO I CC transition probabilities by age.

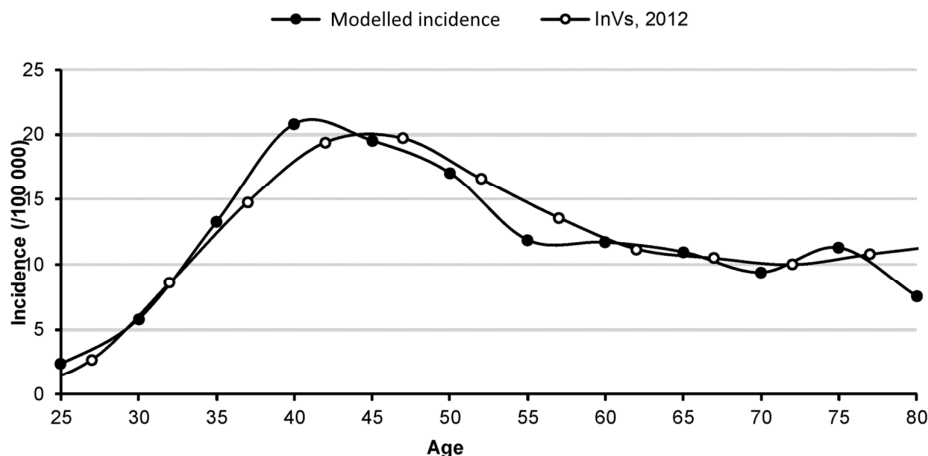

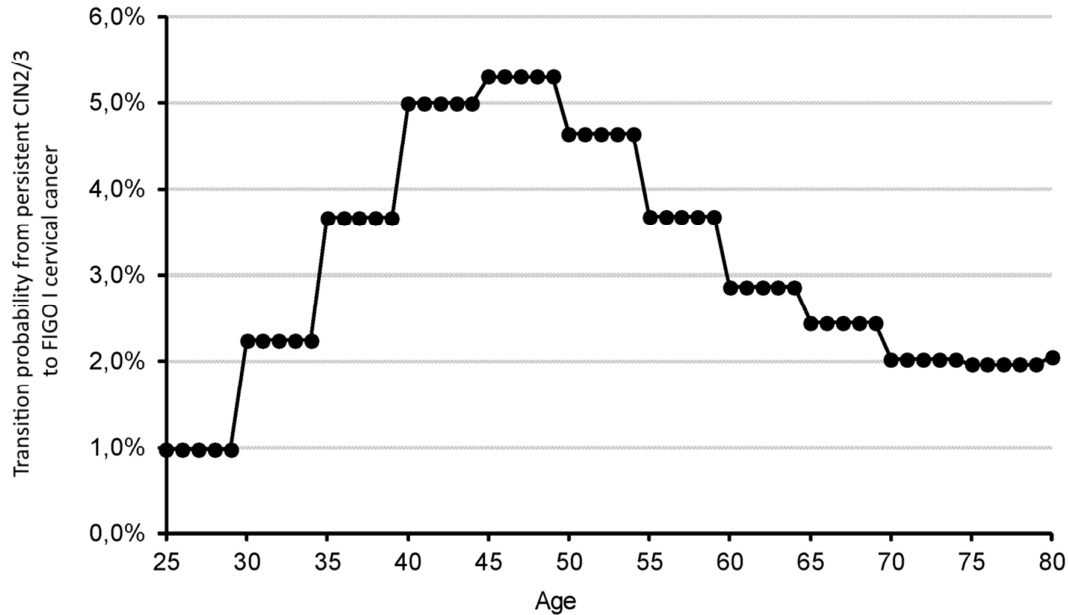

Probabilities of cancer progression and symptom emergence were obtained from the natural history of CC simulation model developed by Myers *et al.*

Cancer mortality by cancer grade and time since diagnosis were obtained from the study by Wright *et al.* based on the estimation of survival among 46,932 women with CC diagnosed from 1983-2009 and recorded in the Surveillance, Epidemiology, and End Results (SEER) database. Survival data for white women under 50 were selected, as mortality by causes other than CC seems unlikely in women under 50. General mortality is modelled according to French national statistics office (INSEE) data.

## Screening

OS participation rates after receiving an invitation or recall are based on the results of local OS experimentations carried out in different regions. The weighted averages of the participation rate upon receiving a mailed invitation or recall letter by the number of Pap-tests performed during each experimentation were respectively found to be 17.3% and 12.1%. Screening test sensitivity and specificity are given in the following table.

| Screening test                   | Sensitivity              | Specificity              | Source          |
|----------------------------------|--------------------------|--------------------------|-----------------|
| Primary Pap-test                 | 70.0 % (57.0 % - 80.0 %) | 95.0 % (92.0 % - 97.0 %) | Mustafa (2015)  |
| Confirmation Pap-test after HPV+ | 85.9 % (76.6 % - 92.1 %) | 65.9 % (63.1 % - 68.6 %) | Bergeron (2015) |
| Primary HPV-test                 | 94.0 % (89.0 % - 97.0 %) | 90.0 % (86.0 % - 93.0 %) | Mustafa (2015)  |
| Confirmation HPV-test after Pap+ | 100.0 % (NR)             | 61.1 % (NR)              | Mayrand (2007)  |
| P16/Ki67                         | 86.7 % (81.1 % - 90.9 %) | 95.2 % (94.9 % - 95.4 %) | Ikenberg (2013) |
| Colposcopy                       | 100.0% (NA)              | 100.0% (NA)              | Assumption      |

At each screening cycle, test performances determine whether women with lesions are screened positive or not depending on their current health state.

Pap-test and p16/Ki67 specificity and specificity are relative to the detection of CIN2/3 and more severe lesions. Women with negative results exit screening, positive results lead to the random draw of an observed lesion type based on the results of the OS experimentation led in the Alsace region (Supplementary file 4).

The action that follows each type of result is then randomly drawn according to the screening algorithms and the results of the OS experimentation led in Alsace. Based on the probabilities reported in Supplementary file 5, the different types of results can lead to further confirmation tests or conisation. Some women become lost to follow-up and exit screening.

|        | Confirmation<br>Pap-test | Confirmation<br>HPV-test | Colposcopy | Conization | Lost to follow-up |
|--------|--------------------------|--------------------------|------------|------------|-------------------|
| ASCUS  | 36,9 %                   | 10,8 %                   | 23,9 %     | 1,3 %      | 27,1 %            |
| ASC    | 36,3 %                   | 0,0 %                    | 48,8 %     | 7,1 %      | 7,8 %             |
| AC     | 6,5 %                    | 0,0 %                    | 30,7 %     | 7,0 %      | 55,9 %            |
| LSIL   | 36,2 %                   | 0,0 %                    | 32,0 %     | 3,5 %      | 28,3 %            |
| HSIL   | 21,4 %                   | 0,0 %                    | 50,1 %     | 19,1 %     | 9,4 %             |
| Cancer | 10,0 %                   | 0,0 %                    | 85,0 %     | 5,0 %      | 0,0 %             |

In order to take the impact of the screening organization structures into account, OS implementation leads to reduced odds of becoming lost to follow-up after a positive result for both OS and IndScr participants. Based on the Alsace and Indre-et-Loire regional OS experimentation results, a 0.77 RR of becoming lost to follow-up is applied.

Colposcopy is associated with 100% sensitivity and specificity. Therefore, colposcopy results are negative in HPV- and HPV+ women and positive in women with CIN1, CIN2/3 and persistent CIN2/3 lesions. Women with CIN1 proceed to a particular screening algorithm based on recommendations by the French national scientific society of obstetricians and gynaecologists (CNGOF).

HPV-tests and specificity are relative to the detection of HPV+ and more severe lesions. Women with negative results exit screening, positive results lead to a confirmation Pap-test (or p16/Ki67) followed by a colposcopy in case of a new positive result. If negative, a new round of HPV and Pap-tests are performed concomitantly after one year: a positive result for either of them (or both) leads to colposcopy; women with negative-only results exit screening.

Rates of lost to follow-up observed during the START-HPV experimentation (Ardennes region) were used. The lost to follow-up rate after positive confirmation Pap-tests was estimated by subtracting the latter from the average rate of lost to follow-up in HPV+ women observed in the Alsace region OS experimentation (27.7%). Similarly to Pap-based screening, a 0.77 RR of being lost to follow-up is applied in OS-participant women.

| Lost to follow-up after        | Probability | Source                                         |
|--------------------------------|-------------|------------------------------------------------|
| Positive HPV-test              | 19,4 %      | START-HPV, Ardennes                            |
| Positive confirmation pap-test | 8,3 %       | START-HPV, Ardennes, Alsace OS experimentation |

All samples have odds of being unreadable, depending on the nature of the sample. Women with unreadable samples perform a new test.

A 95% efficacy was considered for conisation. Women with successful conisation go back to the HPV-state. In case of failure, women leave screening in their current state.

### File 3 Individual screening participation and periodicity data

| Individual screening frequency | Distribution |
|--------------------------------|--------------|
| Annual                         | 5,9%         |
| 2 years                        | 21,5%        |
| 3 years                        | 18,7%        |
| 4 years                        | 8,6%         |
| 5 years                        | 4,3%         |
| 6 years                        | 2,8%         |
| 7 years                        | 1,8%         |
| 8 years                        | 1,1%         |
| 9 years                        | 0,7%         |
| 10 years                       | 0,5%         |

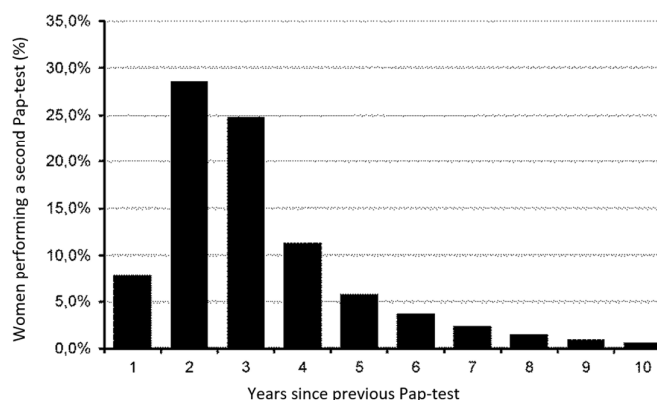

| Population                                                   | RR of participating vs. average | Source                                          |
|--------------------------------------------------------------|---------------------------------|-------------------------------------------------|
| <b>Age</b>                                                   |                                 |                                                 |
| 25 – 30                                                      | 1,06                            | National health insurance database <sup>3</sup> |
| 30 – 35                                                      | 1,08                            | National health insurance database <sup>3</sup> |
| 35 – 40                                                      | 1,07                            | National health insurance database <sup>3</sup> |
| 40 – 45                                                      | 1,04                            | National health insurance database <sup>3</sup> |
| 50 – 55                                                      | 0,92                            | National health insurance database <sup>3</sup> |
| 55 – 60                                                      | 0,82                            | National health insurance database <sup>3</sup> |
| 60 – 65                                                      | 0,77                            | National health insurance database <sup>3</sup> |
| <b>Universal complementary health insurance registration</b> |                                 |                                                 |
| Yes                                                          | 0,80                            | National health insurance database <sup>3</sup> |
| No                                                           | 1,03                            | National health insurance database <sup>3</sup> |

Each woman is associated with an IndScr participation status (Yes/No) and a screening period. Age-dependent probabilities of becoming NP are applied throughout the simulation to account for the lesser participation among older women. These probabilities are determined as follows:

$$P_{become\ non-participant} = (RR_{next\ age-group} / RR_{current\ age-group}) / 5$$

## File 4 Pap-test results depending on HPV infection or lesion type

|                     | ASCUS  | ASC   | AC    | LSIL   | HSIL   | Cancer |
|---------------------|--------|-------|-------|--------|--------|--------|
| HPV-                | 53.5%  | 1.5%  | 2.7%  | 40.1%  | 2.3%   | 0.0%   |
| HPV+                | 53.5%  | 1.5%  | 2.7%  | 40.1%  | 2.3%   | 0.0%   |
| CIN1                | 53.5 % | 1.5 % | 2.7 % | 40.1 % | 2.3 %  | 0.0 %  |
| CIN2/3              | 26.2 % | 6.0 % | 9.6 % | 32.4 % | 23.2 % | 2.6 %  |
| Cancer (all stages) | 0.0%   | 0.0%  | 0.0%  | 0.0%   | 0.0%   | 100.0% |

## File 5 Follow-up of positive Pap-test, by Pap-test result

|        | Confirmation<br>Pap-test | Confirmation<br>HPV-test | Colposcopy | Conization | Lost to follow-up |
|--------|--------------------------|--------------------------|------------|------------|-------------------|
| ASCUS  | 36,9 %                   | 10,8 %                   | 23,9 %     | 1,3 %      | 27,1 %            |
| ASC    | 36,3 %                   | 0,0 %                    | 48,8 %     | 7,1 %      | 7,8 %             |
| AC     | 6,5 %                    | 0,0 %                    | 30,7 %     | 7,0 %      | 55,9 %            |
| LSIL   | 36,2 %                   | 0,0 %                    | 32,0 %     | 3,5 %      | 28,3 %            |
| HSIL   | 21,4 %                   | 0,0 %                    | 50,1 %     | 19,1 %     | 9,4 %             |
| Cancer | 10,0 %                   | 0,0 %                    | 85,0 %     | 5,0 %      | 0,0 %             |



### File 6 Model validation results

The model faithfully reproduces cancer incidence, however the modelled CC mortality was slightly higher than observed data, although differences were systematically inferior to 4 per 100,000.

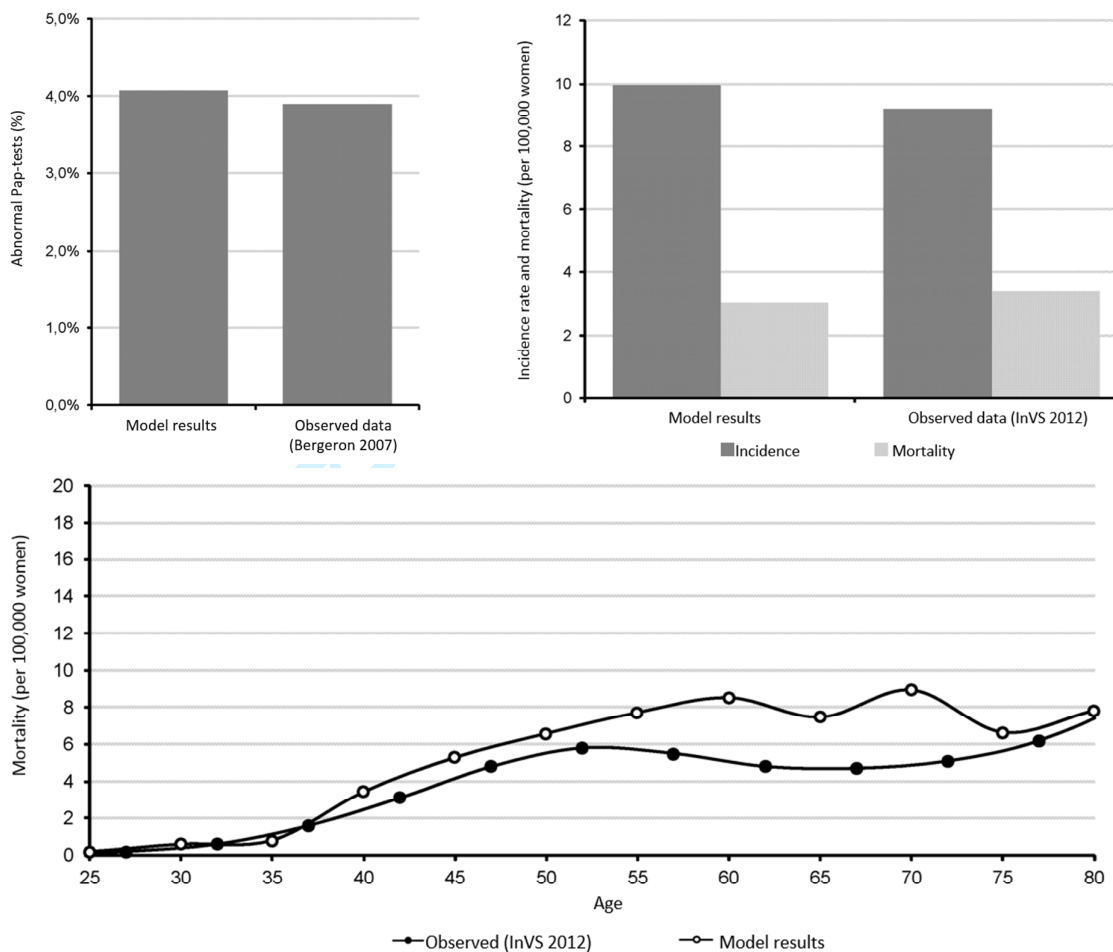

## File 7 Cost-utility analysis - specific inputs and results

| State                                  | Utility/Utility decrement | Source         |
|----------------------------------------|---------------------------|----------------|
| Age 18-29                              | 0.86                      | Perneger, 2010 |
| Age 30-39                              | 0.86                      |                |
| Age 40-49                              | 0.84                      |                |
| Age 50-59                              | 0.81                      |                |
| Age 60-69                              | 0.8                       |                |
| Age 70-79                              | 0.76                      |                |
| Age 80+                                | 0.74                      |                |
| Diagnosed CIN1                         | -0.01                     |                |
| Diagnosed CIN2/3                       | -0.01                     |                |
| Cervical Cancer (1 <sup>st</sup> year) | -0.27                     |                |
| Cervical Cancer (thereafter)           | -0.06                     | Korfage, 2009  |

| Scénario        | QALY   | Total cost (K€) | ICER (€/LY) vs current | Frontier       |
|-----------------|--------|-----------------|------------------------|----------------|
| IndScr only*    | 16.4   | 122.6           | Reference              | Dominated      |
| Pap/Pap-HPV     | +9.54  | +22.3           | 23,392                 | Dominated      |
| Pap/p16Ki67     | +11.18 | +25.5           | 22,891                 | Dominated      |
| HPV/Pap-3y      | +14.99 | +55.8           | 37,290                 | Dominated      |
| HPV/Pap-5y      | +14.76 | -13.3           | Dominant               | Ext. Dominated |
| HPV/Pap-10y     | +9.44  | -73.4           | Dominant               | Reference      |
| HPV/p16Ki67-5y  | +17.06 | +3.79           | 2,222                  | 131,965        |
| HPV/p16Ki67-10y | +11.88 | -64.6           | Dominant               | 36,468         |
| p16Ki67/p16Ki67 | +17.53 | +160.7          | 91,703                 | 3,302,932      |

\*Reference for other scenarios. Extra-QALY per 10,000 women eligible for OS on a lifetime horizon. QALY: Quality Adjusted Life Years

## Table

Table 1 | CHEERS checklist—Items to include when reporting economic evaluations of health interventions

| Section/item                                           | Item No | Recommendation                                                                                                                                                                                                                                                                                                                                        | Reported on page No/line No |
|--------------------------------------------------------|---------|-------------------------------------------------------------------------------------------------------------------------------------------------------------------------------------------------------------------------------------------------------------------------------------------------------------------------------------------------------|-----------------------------|
| <b>Title and abstract</b>                              |         |                                                                                                                                                                                                                                                                                                                                                       |                             |
| Title                                                  | 1       | Identify the study as an economic evaluation or use more specific terms such as "cost-effectiveness analysis", and describe the interventions compared.                                                                                                                                                                                               | 1                           |
| Abstract                                               | 2       | Provide a structured summary of objectives, perspective, setting, methods (including study design and inputs), results (including base case and uncertainty analyses), and conclusions.                                                                                                                                                               | 2                           |
| <b>Introduction</b>                                    |         |                                                                                                                                                                                                                                                                                                                                                       |                             |
| Background and objectives                              | 3       | Provide an explicit statement of the broader context for the study.                                                                                                                                                                                                                                                                                   | 3                           |
|                                                        |         | Present the study question and its relevance for health policy or practice decisions.                                                                                                                                                                                                                                                                 | 3/28 - 29                   |
| <b>Methods</b>                                         |         |                                                                                                                                                                                                                                                                                                                                                       |                             |
| Target population and subgroups                        | 4       | Describe characteristics of the base case population and subgroups analysed, including why they were chosen.                                                                                                                                                                                                                                          | Table 2, 6/12 - 18          |
| Setting and location                                   | 5       | State relevant aspects of the system(s) in which the decision(s) need(s) to be made.                                                                                                                                                                                                                                                                  | 4                           |
| Study perspective                                      | 6       | Describe the perspective of the study and relate this to the costs being evaluated.                                                                                                                                                                                                                                                                   | 6/36 - 37                   |
| Comparators                                            | 7       | Describe the interventions or strategies being compared and state why they were chosen.                                                                                                                                                                                                                                                               | Table 1, 4/2 - 20           |
| Time horizon                                           | 8       | State the time horizon(s) over which costs and consequences are being evaluated and say why appropriate.                                                                                                                                                                                                                                              | 5/27 - 28                   |
| Discount rate                                          | 9       | Report the choice of discount rate(s) used for costs and outcomes and say why appropriate.                                                                                                                                                                                                                                                            | 9/6 - 7                     |
| Choice of health outcomes                              | 10      | Describe what outcomes were used as the measure(s) of benefit in the evaluation and their relevance for the type of analysis performed.                                                                                                                                                                                                               | 9/6 - 7                     |
| Measurement of effectiveness                           | 11a     | <i>Single study-based estimates:</i> Describe fully the design features of the single effectiveness study and why the single study was a sufficient source of clinical effectiveness data.                                                                                                                                                            |                             |
|                                                        | 11b     | <i>Synthesis-based estimates:</i> Describe fully the methods used for identification of included studies and synthesis of clinical effectiveness data.                                                                                                                                                                                                | NA                          |
| Measurement and valuation of preference based outcomes | 12      | If applicable, describe the population and methods used to elicit preferences for outcomes.                                                                                                                                                                                                                                                           | NA                          |
| Estimating resources and costs                         | 13a     | <i>Single study-based economic evaluation:</i> Describe approaches used to estimate resource use associated with the alternative interventions. Describe primary or secondary research methods for valuing each resource item in terms of its unit cost. Describe any adjustments made to approximate to opportunity costs.                           |                             |
|                                                        | 13b     | <i>Model-based economic evaluation:</i> Describe approaches and data sources used to estimate resource use associated with model health states. Describe primary or secondary research methods for valuing each resource item in terms of its unit cost. Describe any adjustments made to approximate to opportunity costs.                           | 6/36 - 7/3                  |
| Currency, price date, and conversion                   | 14      | Report the dates of the estimated resource quantities and unit costs. Describe methods for adjusting estimated unit costs to the year of reported costs if necessary. Describe methods for converting costs into a common currency base and the exchange rate.                                                                                        | 7/2 - 3                     |
| Choice of model                                        | 15      | Describe and give reasons for the specific type of decision-analytical model used. Providing a figure to show model structure is strongly recommended.                                                                                                                                                                                                | Figure 1, 5/23 - 26         |
| Assumptions                                            | 16      | Describe all structural or other assumptions underpinning the decision-analytical model.                                                                                                                                                                                                                                                              | Table 2, 5/29 - 7/3         |
| Analytical methods                                     | 17      | Describe all analytical methods supporting the evaluation. This could include methods for dealing with skewed, missing, or censored data; extrapolation methods; methods for pooling data; approaches to validate or make adjustments (such as half cycle corrections) to a model; and methods for handling population heterogeneity and uncertainty. | 8/6 - 12                    |
| <b>Results</b>                                         |         |                                                                                                                                                                                                                                                                                                                                                       |                             |
| Study parameters                                       | 18      | Report the values, ranges, references, and, if used, probability distributions for all parameters. Report reasons or sources for distributions used to represent uncertainty where appropriate. Providing a table to show the input values is strongly recommended.                                                                                   | Table 2, 6/11 - 7/3         |
| Incremental costs and outcomes                         | 19      | For each intervention, report mean values for the main categories of estimated costs and outcomes of interest, as well as mean differences between the comparator groups. If applicable, report incremental cost-effectiveness ratios.                                                                                                                | Tables 3 & 4                |
| Characterising uncertainty                             | 20a     | <i>Single study-based economic evaluation:</i> Describe the effects of sampling uncertainty for the estimated incremental cost and incremental effectiveness parameters, together with the impact of methodological assumptions (such as discount rate, study perspective).                                                                           |                             |

RESEARCH METHODS & REPORTING

(continued)

| Section/item                                                                                                     | Item No | Recommendation                                                                                                                                                                                                                                                             | Reported on page No/line No |
|------------------------------------------------------------------------------------------------------------------|---------|----------------------------------------------------------------------------------------------------------------------------------------------------------------------------------------------------------------------------------------------------------------------------|-----------------------------|
|                                                                                                                  | 20b     | <i>Model-based economic evaluation:</i> Describe the effects on the results of uncertainty for all input parameters, and uncertainty related to the structure of the model and assumptions.                                                                                | Figures 3 & 4               |
| Characterising heterogeneity                                                                                     | 21      | If applicable, report differences in costs, outcomes, or cost-effectiveness that can be explained by variations between subgroups of patients with different baseline characteristics or other observed variability in effects that are not reducible by more information. | Figures 3 & 4; 11/24 - 35   |
| <b>Discussion</b>                                                                                                |         |                                                                                                                                                                                                                                                                            |                             |
| Study findings, limitations, generalisability, and current knowledge                                             | 22      | Summarise key study findings and describe how they support the conclusions reached. Discuss limitations and the generalisability of the findings and how the findings fit with current knowledge.                                                                          | 12 & 13                     |
| <b>Other</b>                                                                                                     |         |                                                                                                                                                                                                                                                                            |                             |
| Source of funding                                                                                                | 23      | Describe how the study was funded and the role of the funder in the identification, design, conduct, and reporting of the analysis. Describe other non-monetary sources of support.                                                                                        | 1                           |
| Conflicts of interest                                                                                            | 24      | Describe any potential for conflict of interest of study contributors in accordance with journal policy. In the absence of a journal policy, we recommend authors comply with International Committee of Medical Journal Editors recommendations.                          | None                        |
| For consistency, the CHEERS statement checklist format is based on the format of the CONSORT statement checklist |         |                                                                                                                                                                                                                                                                            |                             |

For peer review only

1  
2  
3  
4  
5  
6  
7  
8  
9  
10  
11  
12  
13  
14  
15  
16  
17  
18  
19  
20  
21  
22  
23  
24  
25  
26  
27  
28  
29  
30  
31  
32  
33  
34  
35  
36  
37  
38  
39  
40  
41  
42  
43  
44  
45  
46  
47  
48  
49  
50  
51  
52  
53  
54  
55  
56  
57  
58  
59  
60

# BMJ Open

## Organized screening for cervical cancer in France: a cost-effectiveness assessment

|                                 |                                                                                                                                                                                                           |
|---------------------------------|-----------------------------------------------------------------------------------------------------------------------------------------------------------------------------------------------------------|
| Journal:                        | <i>BMJ Open</i>                                                                                                                                                                                           |
| Manuscript ID                   | bmjopen-2016-014626.R2                                                                                                                                                                                    |
| Article Type:                   | Research                                                                                                                                                                                                  |
| Date Submitted by the Author:   | 15-Jun-2017                                                                                                                                                                                               |
| Complete List of Authors:       | Barré, Stéphanie; Institut National du Cancer, Dépistage<br>Masseti, Marc; Public Health Expertise,<br>Leleu, Henri; Public Health Expertise<br>De Bels, Frédéric; Institut National du Cancer, Dépistage |
| <b>Primary Subject Heading</b>: | Health economics                                                                                                                                                                                          |
| Secondary Subject Heading:      | Oncology, Public health, Diagnostics                                                                                                                                                                      |
| Keywords:                       | Health economics < HEALTH SERVICES ADMINISTRATION & MANAGEMENT, Gynaecological oncology < GYNAECOLOGY, PUBLIC HEALTH                                                                                      |
|                                 |                                                                                                                                                                                                           |

SCHOLARONE™  
Manuscripts

Peer Review Only

## Organized screening for cervical cancer in France: a cost-effectiveness assessment

### Authors:

Barré Stéphanie<sup>1</sup>, Massetti M<sup>2</sup>, Leleu H<sup>2</sup>, De Bels F<sup>1</sup>

1. French National Cancer Institute (INCa), 52 avenue André Morizet, Boulogne Billancourt Cedex, 92513, France.

2. Public Health Expertise, 157 rue du faubourg Saint Antoine, Paris, 75011, France.

### Corresponding author:

Barré Stéphanie, [sbarre@institutcancer.fr](mailto:sbarre@institutcancer.fr), +33 (0) 1 41 10 14 10

**Word count: 3680**

#### French National Cancer Institute

The French National Cancer Institute was established under the Public Health Act of 9 August 2004 as the government health and science agency specialised in cancer control. It is a Public Interest Grouping which brings together State representatives, charities, health insurance funds, hospital federations and research organisations. It is responsible for rolling out the 2014-2019 Cancer Control Plan and reports to the Ministries for Health and for Research.

The Institute provides an integrated approach encompassing all cancer-control dimensions (health, scientific, social and economic) and areas of intervention (prevention, screening, care and research), for the benefit of patients and their relatives.

[www.e-cancer.fr](http://www.e-cancer.fr)

## ABSTRACT

**OBJECTIVE:** According to the third cancer plan, organized screening (OS) of cervical cancer (CC) among women aged 25-65 years should be implemented in France in the forthcoming years. The most efficient way to implement OS in the French health care system is yet to be determined.

**METHODS:** A microsimulation model was developed adopting a collective “all payers” perspective. A closed cohort of women eligible for CC screening and representative in terms of age and participation in individual screening (IndScr) was modelled on a lifetime horizon. Different OS strategies, additive to IndScr with a 61.9% participation rate and based on mailed invitations to perform OS were assessed. 17.3% and 12.1% of women performed a primary test after invitation and recall, respectively. Strategies implied different screening tests (Papanicolaou (Pap) test, HPV test, and p16/Ki67 double-staining) and OS periodicity.

**RESULTS:** Compared to the current IndScr only situation, all OS strategies were associated with decreased cancer incidence/mortality (from -14.2%/-13.5% to -22.9%/-25.8%). Most strategies generated extra costs ranging from €37.9 to €1,607 per eligible woman. HPV testing every 10 and 5 years were cost-saving.

HPV tests every 10 and 5 years were the most efficient strategies, generating more survival at lower costs than Pap-based strategies. Compared to IndScr only, an HPV test every 10 years was cost-saving. The most effective strategies were p16/Ki67 as primary or HPV positive confirmation tests, with respective ICERs of €6,541,250 and €101,391 per life year. Pap-based strategies generated intermediary results.

**CONCLUSION:** OS strategies based on the HPV test appear highly efficient. However, our results rely on the assumption that women and practitioners comply with the recommended OS periodicities (3, 5, 10 years). Implementing these OS modalities will require major adaptations to the current CC screening organization. Pap-test based strategies might be simpler to set-up while preparing an appropriate implementation of more efficient OS screening modalities.

### Strengths and limitations of the study

- A microsimulation model was developed to assess the efficiency of possible cervical cancer organized screening strategies in France.
- The model operates on individual women who are eligible for screening and representative of the current French population on a lifetime horizon.
- Real-life practices and data were used, allowing for the fine modelling of the screening and validation against observed data.
- The lack of precision of transition probabilities in the context of a low incidence of cervical cancer, as well as the assumptions required to model screening practices after primary HPV tests, are the main limitations of the study.

For peer review only



## BACKGROUND

The natural history of cervical cancer (CC) is related to a persistent HPV infection of the cervix leading to squamous intraepithelial lesions that can evolve into cancerous lesions. CC prevention is based on screening to detect and remove lesions at the early stages to prevent invasive cancer and an anti-HPV vaccination to reduce cancer-associated HPV infection.[1]

In France, CC prevention is based on individual voluntary screening (IndScr) for CC of women aged 25 to 65 years and vaccination. IndScr is based on a Papanicolaou test (Pap test) every 3 years, after two annual Pap tests that are negative. Approximately 90% of Pap smears are done by gynaecologists, although general practitioners (GP) and midwives are also authorized to perform it. IndScr has led to a significant decrease in the incidence and associated mortality of CC in the past 20 years. In 2012, CC was the 11<sup>th</sup> most frequent and 12<sup>th</sup> most lethal form of cancer in women.[2] However, many women still do not participate in CC screening. Participation in IndScr was found to be approximately 61% of eligible women, with low access to healthcare, comorbidities and poverty being risk factors for non-participation.

Screening remains the main prevention tool in France, as anti-HPV vaccination is restricted to younger age groups and was only recently made available. Furthermore, vaccination has had a slow adoption in the French population. In 2015, it was estimated that only 17% of women eligible for vaccination were vaccinated.[3;4] In 2014, the third French Cancer Plan has been presented to address both the human and the societal challenges of cancer. CC organized screening (OS) implementation among women aged 25-65 years is part of its first operational objective and aims at a participation rate of 80% and a 30% reduction in CC-related mortality by 2019.[5]

Several OS experimentations have been performed in France to assess the efficacy of different screening modalities, including invitation and positive tests follow-up (FU), self-sampling and HPV-testing. Experimentations that consisted of an invitation of non-participants to perform a Pap test allowed to catch up with 13.2% of all eligible women after 3 years and reduced the lost to follow-up (LtFU) rates of women after a positive result.[6] Additionally, primary HPV-testing and self-sampling were shown to be a feasible alternative to the Pap smear in France.[7;8] Finally, innovative testing, such as p16/Ki67 double-staining, was shown to be a performant alternative for CC screening compared to HPV screening or the Pap test.[9]

Consequently, many alternative strategies can be considered for the implementation of OS for CC in France. Thus, a medico-economic evaluation of several OS strategies based on a cost-effectiveness analysis was performed by the French national cancer institute (INCa), which relied on a scientific steering committee that involved clinical experts and stakeholder representatives (social security, ministry of health, patients and professionals) providing advice on the methodological choices and best OS implementation modality in the French context.

In order to assist decision-making regarding the implementation of CC OS, our study's main outcomes correspond to the objectives of CC OS implementation: participation rate, survival and avoided CC. A cost-utility analysis was performed as well.

## METHODS

Seven strategies were compared to the current IndScr-only situation (table 1). These strategies were all based on adding to the current IndScr with the dispatch of screening invitations (followed by a single recall) to women who did not spontaneously participate in the last 3 years (non-participants). Hence, women who did not participate in regular screening are the only ones targeted by the interventions. OS strategies also included improved FU, resulting in a reduction in LtFU women.

Different screening tests were considered for primary screening or confirmation after a positive primary test, including Pap test, HPV DNA detection and p16/Ki67 double-staining. The women who tested positive for both primary and confirmation tests went through colposcopy and conization if a high-grade (grade 2 or worse [CIN2+]) cervical intraepithelial neoplasia (CIN) lesion was identified. Women with CIN1 were retested at 12, 18 and 24 months if the initial lesion was atypical squamous cells of undetermined significance (ASC-US) or low-grade squamous intraepithelial lesion (LSIL) on Pap, or went through colposcopy. The women who tested positive for a primary test and negative for confirmation were retested after one year. A fraction of the participants was LtFU. Women could only be invited once per cycle. Detailed screening algorithms are available in supplementary file 1.

The population was limited to women aged 25-65 years who are currently eligible for IndScr.

Table 1 Strategies compared

| Strategy         | IR + Improved Follow-up | Primary test       | Confirmation test after positive primary test |
|------------------|-------------------------|--------------------|-----------------------------------------------|
| Current          | No                      | Pap-test / 3 years | Pap-test or HPV                               |
| Pap/Pap          | Yes                     | Pap-test / 3 years | Pap-test                                      |
| Pap/p16Ki67      | Yes                     | Pap-test / 3 years | p16/Ki67                                      |
| HPV/Pap-5y†      | Yes                     | HPV / 5 years      | Pap-test                                      |
| HPV/Pap-3y†      | Yes                     | HPV / 3 years      | Pap-test                                      |
| HPV/Pap-10y†     | Yes                     | HPV / 10 years     | Pap-test                                      |
| HPV/p16Ki67-5y†  | Yes                     | HPV / 5 years      | p16/Ki67                                      |
| HPV/p16Ki67-10y† | Yes                     | HPV / 10 years     | p16/Ki67                                      |
| p16Ki67/p16Ki67  | Yes                     | HPV / 3 years      | p16/Ki67                                      |

IR: invitation + recall for woman who did not participate in IndScr in the last 3 years (non-participant)

†: women 25-35 are not eligible for HPV screening and receive a Pap-test every 3y instead. Women who tested HPV+/confirmation- go through double testing (HPV + Pap) the following year.

### model structure

Given the complexity of screening algorithms (different testing/retesting frequencies) and interactions between participation rates and individual characteristics (age and social), a Markov state microsimulation model was developed. Considering the relatively slow progression of intraepithelial lesions and the long-term benefits of screening, a 1-year cycle-length was used. The model was adapted from a previously published cohort-based Markov model.[10] A cohort of 100,000 women was simulated. Due to the long-term development of the disease and its consequences, a lifetime horizon was applied.

The model first generates a woman with a randomly attributed age, IndScr participation and frequency, health state (HPV-, HPV+, CIN lesions or cancer) and vaccination attributes. At each cycle, women can progress through states that correspond to CC natural history: non-infected women can get an HPV infection according to an age- and vaccination-dependent risk. The infection can progress to CIN1, then CIN2/3 and finally FIGO 1 (Federation of Gynecology and Obstetrics) classified non-invasive cancer. HPV infection and CIN lesions can regress spontaneously until CIN2/3 lesions have become persistent (pCIN2/3). Women in the pCIN2/3 state systematically progress to cancer at an

1  
2  
3 age-dependant rate. FIGO1 lesions can progress to FIGO 2, 3 and 4 and become symptomatic. Once  
4 symptomatic, the lesion is treated and the woman remains in the corresponding treated state with  
5 an associated cancer mortality rate. An age-specific general mortality applies at any state.  
6

7 Each year, the model determines whether the woman undergoes screening individually or after  
8 invitation based on her participation periodicity, time since last screening and participation rates  
9 after invitation. The same primary screening modality is applied to OS and IndScr participants.  
10 Screening test results (positivity and lesion type for Pap tests and positivity for HPV and p16/Ki67)  
11 are determined based on the current state and type of test performed (supplementary file 2 ). After  
12 diagnosis, women with a non-cancerous lesion return to the non-infected state after conization and  
13 cancerous lesions are treated. The structure of the modelled natural history is presented in figure 1.  
14 More details on the model structure are given in the supplementary file 3.  
15  
16

### 17 input data

18 The input data used in the simulation are presented in table 2.  
19

20 The population characteristics are based on available epidemiologic and demographic data that are  
21 representative of the French population. Vaccination status is only determined in women  $\leq 30$  years  
22 old, as it was only recently available in France. IndScr participation and frequency depend on age and  
23 social status, and based on the national health insurance database (supplementary file 4),  
24 approximately 61.9 % of eligible women were found to participate in IndScr at a frequency  $\leq 4$   
25 years.[3] Distribution of each modelled health state by age was not available in France and was  
26 estimated by simulating a cohort of non-vaccinated 14-year-old women undergoing current IndScr-  
27 only screening over their lifetime (supplementary file 3).  
28  
29

30 Transition probabilities (TP) were based on a previously published model.[10] The HPV infection and  
31 pCIN2/3 to cancer progression probabilities were calibrated using the model to reproduce observed  
32 HPV and cancer prevalence by age.[1;11] The high-risk HPV annual infection rate was estimated to be  
33 3.5% to 14%, depending on age.[12] The impact of vaccination is simulated by applying a relative risk  
34 (RR) of infection.[1]  
35

36 Probabilities of cancer progression and emergence of symptoms were obtained from the CC natural  
37 history simulation model developed by Myers *et al.*[13] The cancer specific-mortality by grade and  
38 time since diagnosis was estimated from SEER using data for white women under 50, as it was  
39 assumed that non-specific mortality was low in this group.[14] General mortality was modelled  
40 according to the French national statistics office (INSEE) data.  
41  
42

43 The participation rates after invitation and recall, LtFU rate associated with IndScr, OS effect on LtFU  
44 (RR=0.88), observed lesions on Pap smear and associated care were all based on observational data  
45 from French OS experimentations.[1]  
46

47 The sensitivity and specificity of screening tests were based on clinical studies for detecting CIN2/3  
48 lesions and took into account the test sequence (i.e., HPV after Pap or primary HPV).[9;15-17] One  
49 percent of Pap tests were non-interpretable, which led to a retest.[18] Colposcopy was assumed to  
50 have 100% sensitivity and specificity. A 95% efficacy was considered for conization.  
51

52 The model estimated OS cost and direct medical costs from a collective, "all payers" perspective, as  
53 recommended for France.[19] The OS costs covered invitations and recalls, as well as database  
54 management, tracking of women's participation and FU management. Cost data for consultations  
55 and medical care were based on national tariffs. No extra-consultation costs were added, as it was  
56 considered that IndScr participants did so during a routine consultation. The HPV-analysis tariff was  
57  
58  
59  
60

decreased by 60% in strategies with primary HPV-testing, assuming a substantial cost reduction in cases of an adoption of HPV-testing based OS. This assumption was validated by health insurance and health ministry representatives. According to public-health law, no extra co-payment is applied to OS participants. Cancer states were associated with costs accounting for care and FU by FIGO stage [12] when entering the corresponding diagnosed state. All costs were updated to 2016, using the national consumer price index for healthcare goods and services.

Table 2 Input data

| Parameter                              | Value                                              | Distribution | Source                                                                                                                                          |
|----------------------------------------|----------------------------------------------------|--------------|-------------------------------------------------------------------------------------------------------------------------------------------------|
| <b>Demographic</b>                     |                                                    |              |                                                                                                                                                 |
| Age                                    | 25 - 65<br>Based on distribution                   | NA           | National Statistics (INSEE)                                                                                                                     |
| CMU-c Eligibility (social status)      | 12.2 % (9.8% - 14.6%)                              | Normal       | National Health Insurance Data                                                                                                                  |
| IndScr participation periodicity       | Based on frequency distribution, age and social    | Uniform      | National Health Insurance Data                                                                                                                  |
| Initial Health State                   | Based on distribution                              | NA           | Based on model prediction for a cohort of 14-year-old women                                                                                     |
| <b>Transition probabilities</b>        |                                                    |              |                                                                                                                                                 |
| HR-HPV infection                       | 0.03 – 0.15 (0.03 – 0.18)<br>Based on distribution | Beta         | Estimated to reproduce known prevalence by age [12]                                                                                             |
| HPV-infection regression               | 0.50 (0.40 – 0.60)                                 | Beta         | Riethmuller et al. (1999)[19], Clavel et al. (2001)[20], Boulanger et al. (2004)[21], Beby-Defaux et al. (2004)[22], Dalstein et al. (2004)[23] |
| HR-HPV Infection → CIN 1               | 0.05 (0.04 – 0.06)                                 | Beta         | Moscicki et coll. (2001)[24]                                                                                                                    |
| CIN1 Regression                        | 0.50 (0.40 – 0.60)                                 | Beta         | Melnikow et coll. (1998)[25], Nobbenhuis et coll. (2001)[26], Sanders and Taira (2003)[27], Van De Velde et coll. (2007)[28]                    |
| CIN1 → CIN 2/3                         | 0.12 (0.10 – 0.14)                                 | Beta         | Melnikow et coll. (1998)[25], Sanders and Taira (2003)[27], Van De Velde et coll. (2007)[28]                                                    |
| CIN2/3 Regression                      | 0.28 (0.22 – 0.33)                                 | Beta         | Melnikow et coll. (1998)[25]                                                                                                                    |
| CIN2/3 → pCIN 2/3                      | 0.13 (0.10 – 0.15)                                 | Beta         | Melnikow et coll. (1998)[25]                                                                                                                    |
| Persistent CIN 2/3 → FIGO I            | 0.01 – 0.05 (0.01 – 0.06)<br>Based on distribution | Beta         | Estimated to reproduce known prevalence by age[1.11]                                                                                            |
| FIGO I → FIGO II                       | 0.20 (0.16 – 0.24)                                 | Beta         | Myers et al. 2000[13]                                                                                                                           |
| FIGO II → FIGO III                     | 0.26 (0.21 – 0.31)                                 | Beta         | Myers et al. 2000[13]                                                                                                                           |
| FIGO III → FIGO IV                     | 0.36 (0.29 – 0.43)                                 | Beta         | Myers et al. 2000[13]                                                                                                                           |
| FIGO I → Symptomatic FIGO I            | 0.15 (0.12 – 0.18)                                 | Beta         | Myers et al. 2000[13]                                                                                                                           |
| FIGO II → Symptomatic FIGO II          | 0.23 (0.18 – 0.27)                                 | Beta         | Myers et al. 2000[13]                                                                                                                           |
| FIGO III → Symptomatic FIGO III        | 0.60 (0.48 – 0.71)                                 | Beta         | Myers et al. 2000[13]                                                                                                                           |
| FIGO VI → Symptomatic FIGO IV          | 0.90 (0.67 - 1.00)                                 | Beta         | Myers et al. 2000[13]                                                                                                                           |
| 1-year Cancer Survival                 | 0.43 – 0.98 (0.23 – 0.99)<br>By stage              | Beta         | SEER[14]                                                                                                                                        |
| 5-year Cancer Survival                 | 0.14 – 0.94 (0.06 – 0.97)<br>By stage              | Beta         | SEER[14]                                                                                                                                        |
| 10-year Cancer Survival                | 0.05 – 0.93 (0.01 – 0.96)<br>By stage              | Beta         | SEER[14]                                                                                                                                        |
| <b>Screening</b>                       |                                                    |              |                                                                                                                                                 |
| Participation after invitation         | 17.3% (10.0% - 24.0%)                              | Uniform      | Hamers et al. 2014[6]                                                                                                                           |
| Participation after recall             | 12.1% (5.0% - 18.0%)                               | Uniform      | Hamers et al. 2014[6]                                                                                                                           |
| Lost to follow-up with IndScr          | Based on lesion on Pap.<br>Average 27.7%           | NA           | Hamers et al. 2014[6]                                                                                                                           |
| Reduction in lost to follow-up with OS | 0.77 (0.08 – 0.77)                                 | Uniform      | OS experimentations, INCA personal communication                                                                                                |
| Lesions on PAP                         | Distribution                                       | NA           | Hamers et al. 2014[6]                                                                                                                           |
| Care per lesion                        | Distribution                                       | NA           | Hamers et al. 2014[6]                                                                                                                           |

|                                           |                                |         |                                                                                   |
|-------------------------------------------|--------------------------------|---------|-----------------------------------------------------------------------------------|
| Primary Pap-test (Se)                     | 70.0 % (57.0 % - 80.0 %)       | Beta    | Mustafa <i>et al.</i> (2015)[15]                                                  |
| Confirmation Pap-test after HPV+ (Se)     | 85.9 % (76.6 % - 92.1 %)       | Beta    | Bergeron <i>et al.</i> (2015)[9]                                                  |
| Primary HPV-test (Se)                     | 94.0 % (89.0 % - 97.0 %)       | Beta    | Mustafa <i>et al.</i> (2015)[15]                                                  |
| Confirmation HPV-test after Pap+ (Se)     | 100.0 % (NR)                   | NA      | Mayrand <i>et al.</i> (2007)[17]                                                  |
| p16/Ki67 (Se)                             | 86.7 % (81.1 % - 90.9 %)       | Beta    | Ikenberg <i>et al.</i> (2013)[16]                                                 |
| Colposcopy (Se)                           | 100.0% (NA)                    | NA      | Assumption                                                                        |
| Primary Pap-test (Sp)                     | 95.0 % (92.0 % - 97.0 %)       | Beta    | Mustafa <i>et al.</i> (2015)[15]                                                  |
| Confirmation Pap-test after HPV+ (Sp)     | 65.9 % (63.1 % - 68.6 %)       | Beta    | Bergeron <i>et al.</i> (2015)[9]                                                  |
| Primary HPV-test (Sp)                     | 90.0 % (86.0 % - 93.0 %)       | Beta    | Mustafa <i>et al.</i> (2015)[15]                                                  |
| Confirmation HPV-test after Pap+ (Sp)     | 61.1 % (NR)                    | NA      | Mayrand <i>et al.</i> (2007)[17]                                                  |
| p16/Ki67 (Sp)                             | 95.2 % (94.9 % - 95.4 %)       | Beta    | Ikenberg <i>et al.</i> (2013)[16]                                                 |
| Colposcopy (Sp)                           | 100.0% (NA)                    | NA      | Assumption                                                                        |
| Conisation efficacy                       | 95.0%                          | NA      | Assumption                                                                        |
| Non-interpretable tests                   | 1.0% (1.0% - 3.0%)             | Uniform | Hamers <i>et al.</i> 2014[6]                                                      |
| <b>Costs (€)</b>                          |                                |         |                                                                                   |
| Pap-test (IndScr)                         | 47.78 (38.88 - 57.59)          | Gamma   | National tariffs                                                                  |
| Pap-test (OS)                             | 49.62 (40.37 - 59.81)          | Gamma   | National tariffs                                                                  |
| p16/Ki67 (IndScr)                         | 86.77 (70.60 - 104.58)         | Gamma   | National tariffs                                                                  |
| p16/Ki67 (OS)                             | 88.61 (72.09 - 106.80)         | Gamma   | National tariffs                                                                  |
| HPV-test (IndScr)                         | 47.70 (75.48 - 97.17)          | Gamma   | National tariffs                                                                  |
| HPV-test (OS)                             | 49.54 (49.54 - 71.24)          | Gamma   | National tariffs                                                                  |
| Confirmation Pap-test (IndScr)            | 78.17 (63.60 - 94.21)          | Gamma   | National tariffs                                                                  |
| Confirmation Pap-test (OS)                | 49.63 (40.38 - 59.82)          | Gamma   | National tariffs                                                                  |
| Confirmation p16/Ki67 (IndScr)            | 116.77 (78.09 - 99.57)         | Gamma   | National tariffs                                                                  |
| Confirmation p16/Ki67 (OS)                | 88.23 (71.79 - 106.34)         | Gamma   | National tariffs                                                                  |
| Confirmation HPV-test (IndScr)            | 78.09 (63.53 - 94.12)          | Gamma   | National tariffs                                                                  |
| Confirmation HPV-test (OS)                | 49.55 (49.55 - 71.03)          | Gamma   | National tariffs                                                                  |
| Colposcopy                                | 49.82 (40.54 - 60.05)          | Gamma   | National tariffs                                                                  |
| Conization                                | 93.42 (76.01 - 112.60)         | Gamma   | National tariffs                                                                  |
| FIGO I CC treatment                       | 1041.95 (847.77 - 1255.85)     | Gamma   | Dervaux <i>et al.</i> 2007[12]                                                    |
| FIGO II CC treatment                      | 1818.86 (1479.90 - 2192.25)    | Gamma   | Dervaux <i>et al.</i> 2007[12]                                                    |
| FIGO III CC treatment                     | 25817.84 (21006.43 - 31117.97) | Gamma   | Dervaux <i>et al.</i> 2007[12]                                                    |
| FIGO IV CC treatment                      | 30582.83 (24883.41 - 36861.16) | Gamma   | Dervaux <i>et al.</i> 2007[12]                                                    |
| Database management + Invitation dispatch | 7.00 (4.00 - 11.00)            | Gamma   | Cost of invitation to colorectal OS (Heath Ministry data, personal communication) |
| Recall dispatch                           | 0.40 (0.40 - 3.25)             | Gamma   | 50% postal charges                                                                |

## validation

The model results were compared to observed epidemiological data for validation. The model faithfully reproduces cancer incidence and CC mortality in France.[12] Results of the model validation are available in supplementary file 5.

## analyses

Incremental cost-effectiveness ratios (ICER) were calculated for the life expectancy. Costs and survival were discounted at 4% per year, according to French guidelines for cost-effectiveness studies.[18]

Several alternative scenarios were tested, including not applying the efficacy of OS on LtfU rate, not considering a reduction in HPV cost, and assuming a 60% reduction in p16/Ki67 cost.

The robustness of the model was tested using deterministic sensitivity analysis (DSA). In the DSA, all of the parameters were tested at their confidence intervals (or at  $\pm 20\%$  of the baseline value when the confidence intervals were not available).

## RESULTS

Compared with the current situation, invitation and recall (Pap/Pap) led to an increase from 61.9% to 65.5% in the 4-year participation rate. Every strategy that was tested was associated with a reduction in cancer incidence/mortality, ranging from -14.2%/-13.5% for the Pap/Pap strategy to -22.9%/-25.8% for the HPV/p16Ki67-5y strategy. The undiscounted results are presented in table 3.

Table 3 Undiscounted results

| Scenario        | Outcomes |                  |                 | Costs (€) per woman |                       |         |
|-----------------|----------|------------------|-----------------|---------------------|-----------------------|---------|
|                 | Cancer   | Cancer mortality | OS organisation | Screening           | CC care & conizations | Total   |
| IndScr only*    | 34       | 13               | 0               | 294.2               | 30.9                  | 325.0   |
| Pap/Pap         | -14.2%   | -13.5%           | +19.57          | +13.32              | -3.92                 | +28.97  |
| Pap/p16Ki67     | -16.6%   | -15.9%           | +19.57          | +18.46              | -4.57                 | +33.46  |
| HPV/Pap-3y      | -21.1%   | -22.4%           | +15.16          | +99.87              | -7.31                 | +107.73 |
| HPV/Pap-5y      | -18.9%   | -22.5%           | +15.12          | -29.79              | -7.24                 | -21.91  |
| HPV/Pap-10y     | -8.0%    | -13.6%           | +14.94          | -14.42              | -0.48                 | -134.04 |
| HPV/p16Ki67-5y  | -22.9%   | -25.8%           | +15.10          | +1.57               | -0.81                 | +8.55   |
| HPV/p16Ki67-10y | -11.9%   | -17.0%           | +14.93          | -129.7              | -5.87                 | -120.63 |
| p16Ki67/p16Ki67 | -24.3%   | -24.4%           | +19.57          | +233.30             | -6.87                 | +246.00 |

\*Reference for other scenarios. Cumulated incidence and mortality for 10,000 women eligible for OS on a lifetime horizon.

The average undiscounted cost of screening for the modelled population over a lifetime was €325 per eligible woman, most of which was imputable to screening (€294). Strategies based on HPV-testing with 5-year and 10-year frequencies were cost-saving (-€22 and -€134 per woman, respectively), despite the additional cost of OS (€15). Other strategies were responsible for extra costs, ranging from €29 to €33 for Pap-based screening to €108 for HPV/Pap-3y and €246 for p16Ki67/p16Ki67.

Although it was the cheapest strategy (€191 per eligible woman), HPV/Pap-10y was the strategy with the smallest cancer reduction (-11.9%), as opposed to p16Ki67/p16Ki67, which led to a 25% reduction in CC while being the most expensive strategy (€571 per eligible woman). Figure 2 presents the mean cost per woman and cancer reduction rate for each strategy.

Discounted survival is consistent with CC incidence and mortality (table 4). Compared to the current situation (19.4 LY survival), OS strategies led to an increase in survival, ranging from 10 years per

10,000 women for the Pap/Pap and HPV/Pap-10y strategies to 18 years per 10,000 women for the HPV/p16Ki67 and p16Ki67/p16Ki67 strategies. Discounted extra costs per 10,000 eligible women ranged from €38,000 (HPV/Pap-5y) to €1,608,000 (p16Ki67/p16Ki67). HPV/Pap-5y and HPV/Pap-10y remained cost-saving after discounting. Hence, these strategies were more effective and more cost-saving than Pap-based strategies, including the current situation, and were the dominant OS strategies. HPV/p16Ki67-5y and p16Ki67/p16Ki67 were more effective than HPV/Pap-5y and HPV/Pap-10y with ICERs of €101,391 and €6,541,250 per LY, respectively. HPV/Pap-3y was as effective as HPV/Pap-5y but less effective than HPV/p16Ki67-5y while generating much more expenses.

Table 4 Discounted results

| Scenario        | Survival (LY) | Total cost (K€) | ICER (€/LY) vs current | Frontier       |
|-----------------|---------------|-----------------|------------------------|----------------|
| IndScr only*    | 19.4          | 122.6           | Reference              | Dominated      |
| Pap/Pap-HPV     | +10.04        | +22.3           | 22,234                 | Dominated      |
| Pap/p16Ki67     | +11.68        | +25.5           | 21,918                 | Dominated      |
| HPV/Pap-3y      | +15.93        | +55.8           | 35,095                 | Dominated      |
| HPV/Pap-5y      | +15.89        | -13.3           | Dominant               | Ext. Dominated |
| HPV/Pap-10y     | +10.51        | -73.4           | Dominant               | Reference      |
| HPV/p16Ki67-5y  | +18.13        | +3.79           | 2,091                  | 101,389        |
| HPV/p16Ki67-10y | +13.00        | -64.6           | Dominant               | 35,846         |
| p16Ki67/p16Ki67 | +18.37        | +160.7          | 87,546                 | 6,592,441      |

\*Reference for other scenarios. Extra-survival per 10,000 women eligible for OS on a lifetime horizon. LY: Life Years

Regardless of the modality, implementing an OS programme for cervical cancer in France led to an overall improvement in the CC screening rate and a reduction in CC incidence and mortality. Reducing LtFU rates and improving screening rates with invitations/recall as in the Pap/Pap scenario results in an ICER of €22,231 per LY and an average extra survival of 10 LY per 10,000 eligible women.

Switching primary screening from the Pap-test to HPV-testing led to similar LY gains with a 10-year screening frequency, yet the 5-year frequency led to a longer survival (15.89 vs. 10.51 LY per 10,000 eligible women). Furthermore, reducing the frequency of primary testing was cost-saving, even at the current cost of HPV-testing. Despite the longer interval between the two screening tests, HPV-based strategies remained effective because of their superior sensitivity compared to the Pap-test.

The very good sensitivity/specificity of p16/Ki67 double-staining used as a primary screening test led to significant survival gains compared to the current situation and HPV-testing (+18.37 and +2.48 per 10,000 eligible women, respectively). However, its high cost made it inefficient, with an ICER of €6,592,441/LY.

Switching the Pap test with p16/Ki67 double-staining in the confirmation of positive Pap and HPV primary tests increased efficacy and led to moderate additional costs. The confirmation of HPV tests every 10 years increased the survival from +10.51 to +13.0 LY and the costs from -€734,000 to -€646,000 per 10,000 eligible women. Thus, the HPV/p16Ki67-10y scenario was associated with an ICER of €35,846/LY. The cost-utility results do not lead to different conclusions. A cost-utility analysis was performed by applying specific health utilities to the health states and utility decrements to non-cancerous and cancerous states. Its results and the utility values used are available in a supplementary file 6.

### sensitivity and scenario analyses

Deterministic sensitivity analysis and scenario analyses for HPV/Pap-10y versus the current situation for LY and costs are shown in figures 3 and 4, respectively.

1  
2  
3 The parameters with the biggest impact were the cost of testing (HPV and Pap) and OS effect on LtFU  
4 rate after a positive result. However, HPV/Pap-10y systematically remained the most cost-effective  
5 alternative. The mean age of the cohort impacted results drastically, despite HPV screening being  
6 less beneficial in women under 30 years old and over 50 years old than in the rest of the eligible  
7 population. Vaccination rates up to 80% had a negligible impact. Similar results were seen for  
8 HPV/Pap-5y and HPV/p16Ki67-5y scenarios. Not taking into account the effect of OS on LtFU rate did  
9 not change the conclusion, although it significantly reduced the LY gains compared to in the IndScr  
10 only. Similarly, not considering a reduction in the cost of the HPV test led to similar conclusions:  
11 HPV/Pap-10y and HPV/Pap-5y remained less costly than the alternative strategies. Finally, a 60%  
12 reduction in p16/Ki67 cost led to a decreased total cost of €41.05 (-75%) for the p16Ki67/p16Ki67  
13 scenario.  
14  
15

## 16 DISCUSSION

17 Using a comprehensive, validated microsimulation model that allows for the fine modelling of CC  
18 natural history and screening modalities, we showed that the OS programme for cervical cancer in  
19 France leads to a reduction of CC incidence and mortality. HPV-based screening with 5- or 10-year  
20 frequencies would be cost-saving, and other modalities would generate extra costs ranging between  
21 €37.9 and €1,607 per woman.  
22  
23

24 Most model inputs were based on observed “real-life” data instead of simple screening guidelines.  
25 This allows for an accurate simulation of women’s screening behaviour by considering that many  
26 women do not comply with the recommended screening frequency and that older women tend to  
27 drop out of screening.[3] This also allowed for the implementation of current professional practices  
28 that significantly differ from recommended screening algorithms: in the current IndScr only situation,  
29 after a positive Pap test, not all women proceed to confirmation (Pap or HPV test), as some directly  
30 undergo colposcopy or conization, depending on the identified lesion with a significant impact on  
31 IndScr efficiency. Finally, the model incorporates LtFU rates, which proved to be a key factor in OS  
32 efficacy, particularly when screening frequency was superior to 5 years.[6]  
33  
34

35 The model’s main limitations stem from the estimation of the transition probabilities (TP). An initial  
36 literature review showed important variations between sources with some TP being not available.  
37 Additionally, the identified TP were not precise enough given the low incidence of lesions in the  
38 general population of women (1 in 10,000). Thus, we favoured sources that had previously been used  
39 in French models to allow comparability with previously published results.[10.12] Additionally, the  
40 model was calibrated on available prevalence data in France and externally validated. Furthermore,  
41 the sensitivity analyses showed that, despite the uncertainty, TP variations had a limited impact on  
42 the results, which reinforces our confidence in the estimations. Finally, our results are comparable to  
43 previously published European studies: Accetta *et al.* have found that an HPV test every 5 years is  
44 more effective and less costly than triennial Pap-tests in Italy.[29] The decreased efficiency of CC  
45 screening based on the HPVtest at lower frequencies was shown by Berkhof *et al.* in the  
46 Netherlands.[30] In Norway, Burger *et al.* found results comparable to ours for the Pap/Pap  
47 strategy.[31]  
48  
49  
50

51 In our analysis, HPV/Pap-10y was the most efficient strategy, with HPV/p16Ki67-10y being a more  
52 cost-effective alternative. However, the final modality choice for OS-implementation will need to  
53 consider several factors. First, the HPV/Pap-10y strategy, albeit the most efficient, is the less  
54 effective strategy in terms of cancer incidence and prevalence reduction, conflicting with the primary  
55 aim of the Cancer Plan to further reduce the CC burden in France [5] and thus making the HPV/Pap-  
56 5y a more suitable, cost-saving modality. Second, current screening behaviours in France result in  
57 over-participation, with numerous women performing Pap-tests more often than is recommended.  
58  
59  
60



1  
2  
3 This phenomenon is likely to be related to the yearly recommended consultation with a  
4 gynaecologist. Our results showed that going from a 5-year frequency to a 3-year frequency implies a  
5 huge increase in screening cost (from -€133,000 to +€558,000 per 10,000 eligible women) for a very  
6 small increase in survival (from 15.89 to 15.93). Indeed, HPV-testing is sensitive, but it has a low  
7 specificity and cervical lesion evolution is slow, with most lesions regressing spontaneously. Women's  
8 over-participation will thus be a challenge in the case of HPV-based OS implementation. This should  
9 be addressed beforehand, or these apparent efficient strategies would be poorly efficient, leading to  
10 frequent false-positive results and related unnecessary and potentially harmful testing. Third, HPV-  
11 testing is not recommended in women under 35 years of age, which would require a complex double  
12 screening system. Finally, the current screening organization in France is based on the Pap-test,  
13 which implies a different infrastructure. Switching to HPV would require the negotiation of HPV-test  
14 tariffs, the development of a quality assurance protocol to ensure a sensitivity that is consistent with  
15 those found during clinical studies, as well as the development of the required infrastructure and  
16 equipment. Thus, although primary HPV-testing produces results with a better efficiency, many  
17 challenges will need to be addressed before its implementation. In the meantime, switching to a Pap-  
18 test based OS remains an acceptable alternative and could lead the way to HPV-testing deployment.

19  
20  
21  
22 As for p16/KI67 double-staining, our results show that it would be an efficient confirmation test or  
23 primary test with negotiated tariffs. However, the sensitivity and specificity of the test were based on  
24 a single study with centralized reading. Additional studies in different French settings would be  
25 required to confirm that the results are reproducible before generalization.

26  
27  
28 Lastly, we do not present our results relatively to a willingness-to-pay threshold. This choice results  
29 from the fact that no cost-effectiveness threshold is relevant in France, since the national agency in  
30 charge of health technology assessment, including pharmacoeconomic evaluation (HAS) does not  
31 wish cost-effectiveness results to be compared to a threshold. Indeed, cost-effectiveness analyses  
32 are not used as a resource allocation tool for health technologies in France. Furthermore, since  
33 implementation of CC OS was decided, we did not aim to assess whether and how OS was efficient,  
34 but to determine which screening modality was the most efficient, keeping in mind practical issues.  
35 We feel that this choice is further reinforced by our results that confirm the legislator's decision to  
36 implement OS. In summary, this modelling study enabled the INCa to provide robust information to  
37 support a public decision on both efficient intermediate modalities for implementation of the CC OS  
38 programme and also on optimal screening strategies in a longer term and to anticipate the  
39 integration of promising technological innovations.  
40  
41  
42  
43  
44  
45  
46  
47  
48  
49  
50  
51  
52  
53  
54  
55  
56  
57  
58  
59  
60

## Funding

This work was entirely funded by the National Cancer Institute.

## Declaration of interests

The authors have no conflict of interest to declare concerning this study.

## Authorship Statement

All authors participated in the study. Barré S, Leleu H and Massetti M participated in model development, data analysis and drafting of the manuscript. Barré S and De Bels F made critical review of the manuscript and approved its final version.

## Data Sharing

No additional data available.

## Notes/Acknowledgments

The authors acknowledge the members of the Scientific Committee for study for their critical review of the methodological choices, discussion of the results and conclusions of this medico-economic evaluation study:

Pr Jean Jacques Baldauf (Centre hospitalier universitaire de Strasbourg), Dr Anne Sophie Banaszuk (Structure de gestion du Maine et Loire), Nathalie Beltzer (Santé Publique France), Dr Mohamed-Béchir Ben Hadj Yahia (Centre hospitalier régional universitaire de Lille), Julia Bonastre (Institut Gustave Roussy), Dr Véronique Dalstein (Centre hospitalier universitaire Reims), Dr Marie Flori (Université de Lyon 1), Julie Gaillot (Institut National du Cancer), Chrystelle Gastaldi-Ménager (Caisse nationale d'assurance maladie des travailleurs salariés), Ken Haguenoer (Centre hospitalier régional universitaire de Tours), Françoise Hamers (Santé Publique France), Guy Launoy (Centre hospitalier universitaire de Caen, Inserm), Patricia Lucidarme (Collège national des sages-femmes), Emmanuel Ricard (Ligue Nationale contre le cancer), Jean-Paul Romarin (Agence régionale de santé du Languedoc-Roussillon Midi-Pyrénées), Catherine Rumeau-Pichon (Haute Autorité de Santé), Emmanuelle Salines (Ministère de la Santé) Nadia Thomas (Structure de gestion de Guyane), Alain Trugeon (Observatoire régional de santé de Picardie), Hélène Vandewalle (Institut National du Cancer), Anne Sophie Woronoff (Registre des cancers du Doubs), Laura Zanetti (Haute Autorité de Santé)

## Figure Legends

Figure 1: Structure of the model for the natural history of cervical cancer

Figure 2: Results of OS strategies assessed on cancer reduction rate and associated mean cost

Figure 3: Tornado diagram of DSA and scenario analyses with the biggest impact on survival for HPV/Pap-10y versus current situation

Figure 4: Tornado diagram of DSA and scenario analyses with the biggest impact on costs for HPV/Pap-10y versus current situation

## REFERENCES

1. Haute Autorité de Santé. État des lieux et recommandations pour le dépistage du cancer du col de l'utérus en France. 2010. [http://www.has-sante.fr/portail/jcms/c\\_1009772/fr/etat-des-lieux-et-recommandations-pour-le-depistage-du-cancer-du-col-de-l-uterus-en-France](http://www.has-sante.fr/portail/jcms/c_1009772/fr/etat-des-lieux-et-recommandations-pour-le-depistage-du-cancer-du-col-de-l-uterus-en-France)
2. Monnereau A, Remontet L, Maynadié, *et al.* Estimation nationale de l'incidence des cancers en France entre 1980 et 2012. Etude à partir des registres des cancers du réseau Francim - Partie 1 : tumeurs solides. 2013. <http://invs.santepubliquefrance.fr/Publications-et-outils/Rapports-et-syntheses/Maladies-chroniques-et-traumatismes/2013/Estimation-nationale-de-l-incidence-des-cancers-en-France-entre-1980-et-2012>
3. Institut National du Cancer. Généralisation du dépistage du cancer du col de l'utérus /Étude médico-économique /Phase 1. 2015. <http://www.e-cancer.fr/Expertises-et-publications/Catalogue-des-publications/Synthese-Generalisation-du-depistage-du-cancer-du-col-de-l-uterus-etude-medico-economique-Phase-1>
4. Institut de Veille Sanitaire. Vaccination rate among women under 30. 2015. Personal Communication
5. Ministère des Affaires sociales et de la santé, Ministère de l'Enseignement supérieur et de la recherche. Plan Cancer 2014-2019, Guérir et prévenir les cancers : donnons les mêmes chances à tous, partout en France. 2014. <http://www.e-cancer.fr/Plan-cancer/Plan-cancer-2014-2019-priorites-et-objectifs>
6. Hamers FF, Duport N, Beltzer N. Population-based organized cervical cancer screening pilot program in France. *Eur J Cancer Prev.* 2017 Mar 30.
7. Haguenoer K, Sengchanh S, Gaudy-Graffin C, *et al.* Vaginal self-sampling is a cost-effective way to increase participation in a cervical cancer screening programme: a randomised trial. *British journal of cancer.* 2014;111(11):2187-96.
8. Dalstein V, Charlier B, Botokey J, *et al.* Évaluation intermédiaire de START -HPV, programme pilote de dépistage primaire par test HPV des lésions précancéreuses et cancéreuses du col utérin dans le département des Ardennes, France, 2012-2013. *Bull Epidémiol Hebd.* 2014(13-14-15):254-9.
9. Bergeron C, Ikenberg H, Sideri M, *et al.* Prospective evaluation of p16/Ki-67 dual-stained cytology for managing women with abnormal Papanicolaou cytology: PALMS study results. *Cancer Cytopathol.* 2015;123(6):373-81.
10. Demarteau N, Detournay B, Tehard B, *et al.* A generally applicable cost-effectiveness model for the evaluation of vaccines against cervical cancer. *International journal of public health.* 2011;56(2):153-62.
11. Binder-Foucard F, Belot A, Delafosse P, *et al.* Estimation nationale de l'incidence et de la mortalité par cancer en France entre 1980 et 2005. Etude à partir des registres des cancers du réseau Francim - Partie 1 : tumeurs solides. 2008 <http://invs.santepubliquefrance.fr/Publications-et-outils/Rapports-et-syntheses/Maladies-chroniques-et-traumatismes/2013/Estimation-nationale-de-l-incidence-et-de-la-mortalite-par-cancer-en-France-entre-1980-et-2012>
12. Dervaux B, Lenne X, Lévy-Bruhl D, *et al.* Modélisation médico-économique de l'impact de l'organisation du dépistage du cancer du col utérin et de l'introduction de la vaccination contre les HPV dans le calendrier vaccinal. 2008. [https://www.mesvaccins.net/textes/rapport\\_modelisation\\_hpv.pdf](https://www.mesvaccins.net/textes/rapport_modelisation_hpv.pdf)

- 1  
2  
3 13. Myers E R, McCrory D C, Nanda K, *et al*. Mathematical model for the natural history of human  
4 papillomavirus infection and cervical carcinogenesis. *American journal of epidemiology*.  
5 2000;151(12):1158-71.  
6
- 7 14. Wright J D, Chen L, Tergas A I, *et al*. Population-level trends in relative survival for cervical  
8 cancer. *Am J Obstet Gynecol*. 2015.  
9
- 10 15. Mustafa R A, Santesso N, Khatib R, *et al*. Systematic reviews and meta-analyses of the  
11 accuracy of HPV tests, visual inspection with acetic acid, cytology, and colposcopy. *Int J Gynaecol*  
12 *Obstet*. 2016;132(3):259-65.  
13
- 14 16. Ikenberg H, Bergeron C, Schmidt D, *et al*. Screening for cervical cancer precursors with  
15 p16/Ki-67 dual-stained cytology: results of the PALMS study. *Journal of the National Cancer Institute*.  
16 2013;105(20):1550-7.  
17
- 18 17. Mayrand M. H, Duarte-Franco E, Rodrigues I, *et al*. Human papillomavirus DNA versus  
19 Papanicolaou screening tests for cervical cancer. *N Engl J Med*. 2007;357(16):1579-88.  
20
- 21 18. Haute Autorité de Santé. Choix méthodologiques pour l'évaluation médico-économique à la  
22 HAS. 2011. [http://www.has-sante.fr/portail/upload/docs/application/pdf/2011-](http://www.has-sante.fr/portail/upload/docs/application/pdf/2011-11/guide_methodo_vf.pdf)  
23 [11/guide\\_methodo\\_vf.pdf](http://www.has-sante.fr/portail/upload/docs/application/pdf/2011-11/guide_methodo_vf.pdf)  
24
- 25 19. Riethmuller D, Gay C, Bertrand X, *et al*. Genital human papillomavirus infection among  
26 women recruited for routine cervical cancer screening or for colposcopy determined by Hybrid  
27 Capture II and polymerase chain reaction. *Diagn Mol Pathol*. 1999;8(3):157-64.  
28
- 29 20. Clavel C, Masure M, Bory J P, *et al*. Human papillomavirus testing in primary screening for the  
30 detection of high-grade cervical lesions: a study of 7932 women. *British journal of cancer*.  
31 2001;84(12):1616-23.  
32
- 33 21. Boulanger J C, Sevestre H, Bauville E, *et al*. [Epidemiology of HPV infection]. *Gynecol Obstet*  
34 *Fertil*. 2004;32(3):218-23.  
35
- 36 22. Beby-Defaux A, Bourgoin A, Ragot S, *et al*. Human papillomavirus infection of the cervix uteri  
37 in women attending a Health Examination Center of the French social security. *Journal of medical*  
38 *virology*. 2004;73(2):262-8.  
39
- 40 23. Dalstein V, Riethmuller D, Sautiere J L, *et al*. Detection of cervical precancer and cancer in a  
41 hospital population; benefits of testing for human papillomavirus. *European journal of cancer*  
42 (Oxford, England : 1990). 2004;40(8):1225-32.  
43
- 44 24. Moscicki A B, Hills N, Shiboski S, *et al*. Risks for incident human papillomavirus infection and  
45 low-grade squamous intraepithelial lesion development in young females. *Jama*. 2001;285(23):2995-  
46 3002.  
47
- 48 25. Melnikow J, Nuovo J, Willan A R, *et al*. Natural history of cervical squamous intraepithelial  
49 lesions: a meta-analysis. *Obstetrics and gynecology*. 1998;92(4 Pt 2):727-35.  
50
- 51 26. Nobbenhuis M A, Helmerhorst T J, van den Brule A J, *et al*. Cytological regression and  
52 clearance of high-risk human papillomavirus in women with an abnormal cervical smear. *Lancet*.  
53 2001;358(9295):1782-3.  
54
- 55 27. Sanders G D, Taira A V. Cost-effectiveness of a potential vaccine for human papillomavirus.  
56 *Emerg Infect Dis*. 2003;9(1):37-48.  
57  
58  
59  
60

- 1  
2  
3 28. Van de Velde N, Brisson M, Boily M C Modeling human papillomavirus vaccine effectiveness:  
4 quantifying the impact of parameter uncertainty. *American journal of epidemiology*.  
5 2007;165(7):762-75.  
6  
7 29. Accetta G, Biggeri A, Carreras G, *et al*. Is human papillomavirus screening preferable to  
8 current policies in vaccinated and unvaccinated women? A cost-effectiveness analysis. *Journal of*  
9 *medical screening*. 2010;17(4):181-9.  
10  
11 30. Berkhof J, Coupe V M, Bogaards J A, *et al*. The health and economic effects of HPV DNA  
12 screening in The Netherlands. *International journal of cancer Journal international du cancer*.  
13 2010;127(9):2147-58.  
14  
15 31. Burger E A, Kim J J. The value of improving failures within a cervical cancer screening  
16 program: an example from Norway. *International journal of cancer Journal international du cancer*.  
17 2014;135(8):1931-9.  
18  
19  
20  
21  
22  
23  
24  
25  
26  
27  
28  
29  
30  
31  
32  
33  
34  
35  
36  
37  
38  
39  
40  
41  
42  
43  
44  
45  
46  
47  
48  
49  
50  
51  
52  
53  
54  
55  
56  
57  
58  
59  
60

1  
2  
3  
4  
5  
6  
7  
8  
9  
10  
11  
12  
13  
14  
15  
16  
17  
18  
19  
20  
21  
22  
23  
24  
25  
26  
27  
28  
29  
30  
31  
32  
33  
34  
35  
36  
37  
38  
39  
40  
41  
42  
43  
44  
45  
46  
47  
48  
49  
50  
51  
52  
53  
54  
55  
56  
57  
58  
59  
60

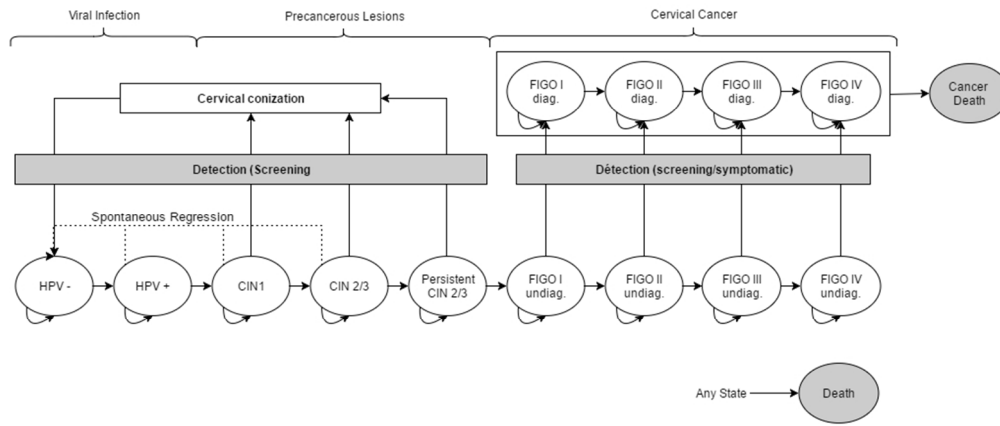

Structure of the model for the natural history of cervical cancer

86x36mm (300 x 300 DPI)

Peer review only



Results of OS strategies assessed on cancer reduction rate and associated mean cost

119x76mm (300 x 300 DPI)

Review only

1  
2  
3  
4  
5  
6  
7  
8  
9  
10  
11  
12  
13  
14  
15  
16  
17  
18  
19  
20  
21  
22  
23  
24  
25  
26  
27  
28  
29  
30  
31  
32  
33  
34  
35  
36  
37  
38  
39  
40  
41  
42  
43  
44  
45  
46  
47  
48  
49  
50  
51  
52  
53  
54  
55  
56  
57  
58  
59  
60

1  
2  
3  
4  
5  
6  
7  
8  
9  
10  
11  
12  
13  
14  
15  
16  
17  
18  
19  
20  
21  
22  
23  
24  
25  
26  
27  
28  
29  
30  
31  
32  
33  
34  
35  
36  
37  
38  
39  
40  
41  
42  
43  
44  
45  
46  
47  
48  
49  
50  
51  
52  
53  
54  
55  
56  
57  
58  
59  
60

Results of DSA and scenario analyses with the biggest impact on survival for organised screening by invitation and recall of non-participant eligible women to perform a HPV-test every 10 years (Pap-test confirmation) versus current situation

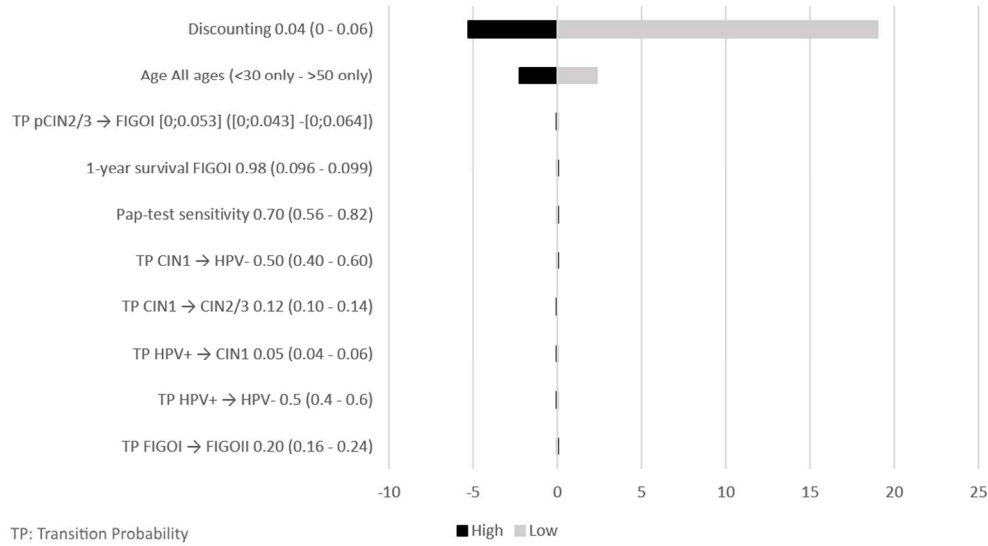

Tornado diagram of DSA and scenario analyses with the biggest impact on survival for HPV/Pap-10y versus current situation

102x67mm (300 x 300 DPI)

view only



1  
2  
3  
4  
5  
6  
7  
8  
9  
10  
11  
12  
13  
14  
15  
16  
17  
18  
19  
20  
21  
22  
23  
24  
25  
26  
27  
28  
29  
30  
31  
32  
33  
34  
35  
36  
37  
38  
39  
40  
41  
42  
43  
44  
45  
46  
47  
48  
49  
50  
51  
52  
53  
54  
55  
56  
57  
58  
59  
60

Results of DSA and scenario analyses with the biggest impact on costs for organised screening by invitation and recall of non-participant eligible women to perform a HPV-test every 10 years (Pap-test confirmation) versus current situation

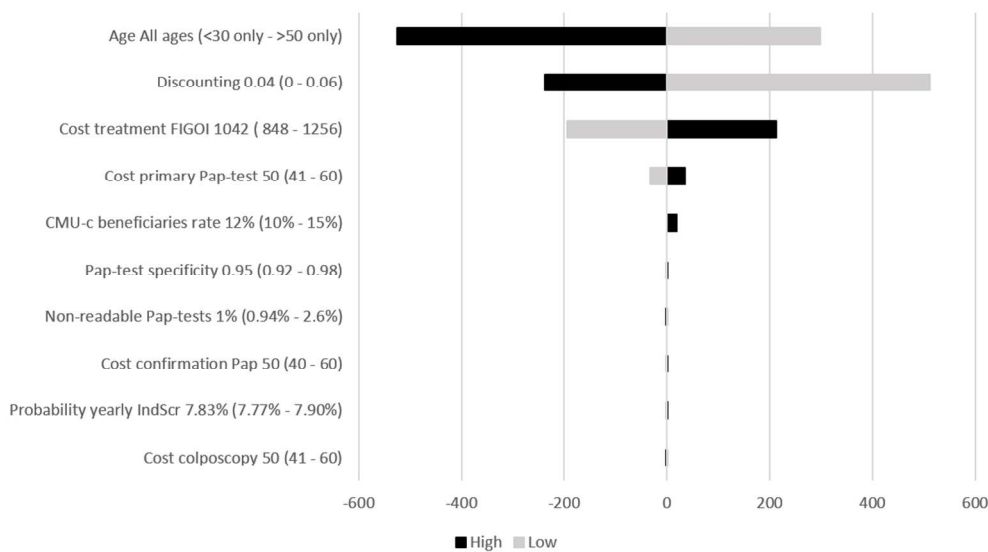

Tornado diagram of DSA and scenario analyses with the biggest impact on costs for HPV/Pap-10y versus current situation

102x67mm (300 x 300 DPI)

View only

Supplementary File 1 Screening algorithms

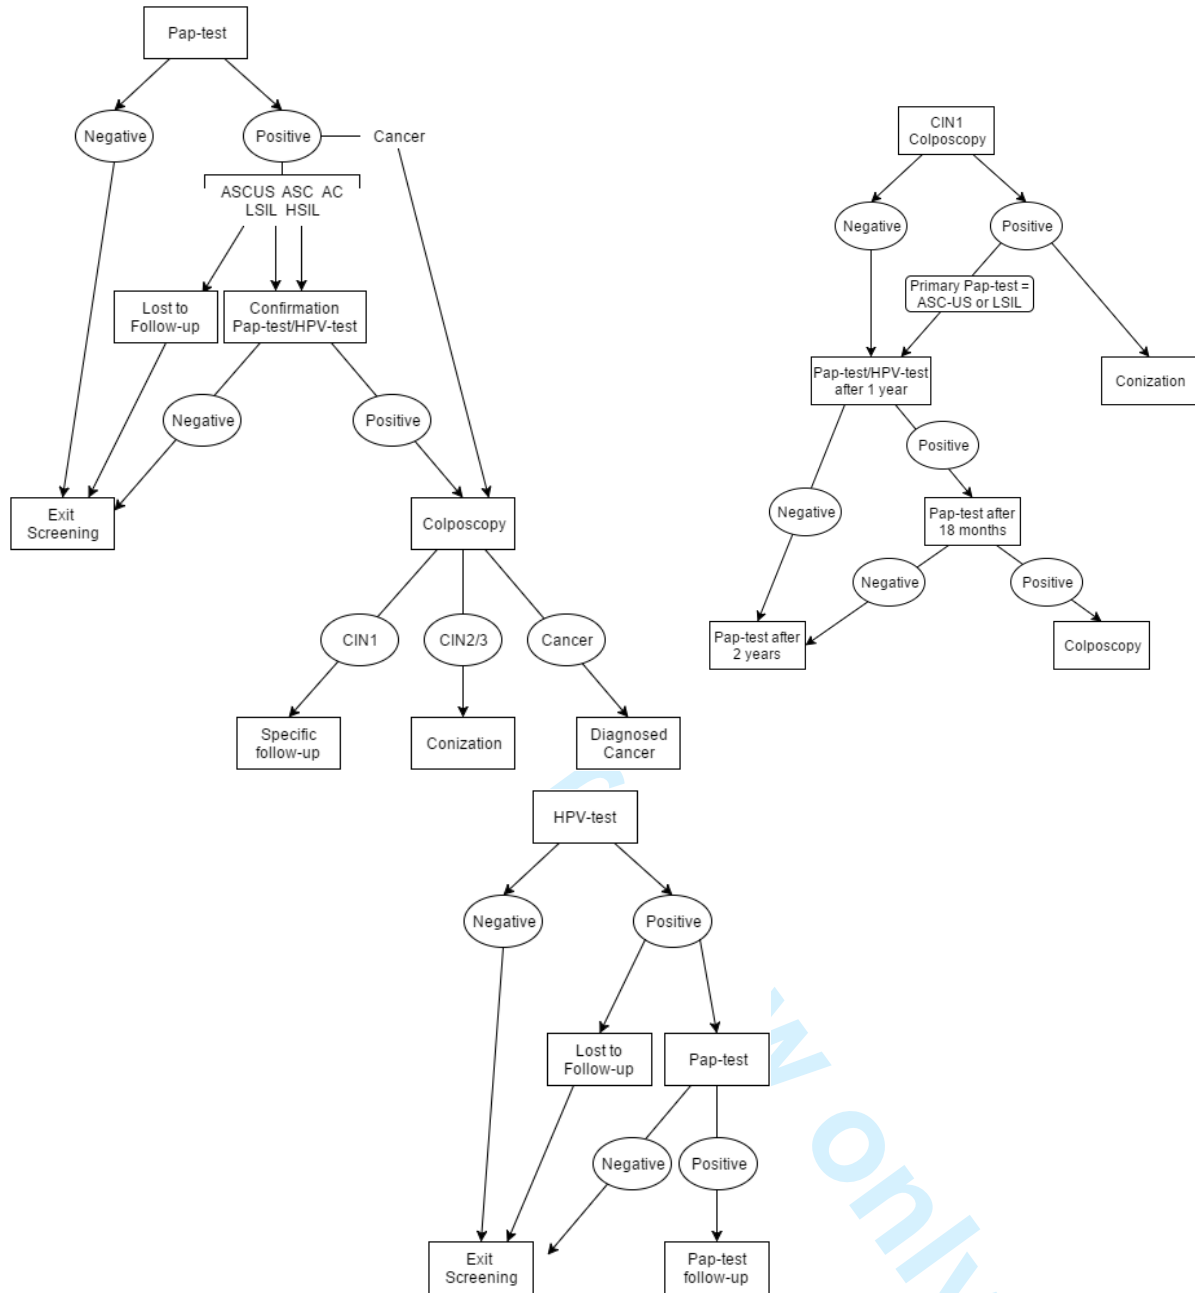

1  
2  
3  
4  
5  
6  
7  
8  
9  
10  
11  
12  
13  
14  
15  
16  
17  
18  
19  
20  
21  
22  
23  
24  
25  
26  
27  
28  
29  
30  
31  
32  
33  
34  
35  
36  
37  
38  
39  
40  
41  
42  
43  
44  
45  
46  
47  
48  
49  
50  
51  
52  
53  
54  
55  
56  
57  
58  
59  
60

## Supplementary File 2 Pap-test results depending on HPV infection or lesion type

|                     | ASCUS  | ASC   | AC    | LSIL   | HSIL   | Cancer |
|---------------------|--------|-------|-------|--------|--------|--------|
| HPV-                | 53.5%  | 1.5%  | 2.7%  | 40.1%  | 2.3%   | 0.0%   |
| HPV+                | 53.5%  | 1.5%  | 2.7%  | 40.1%  | 2.3%   | 0.0%   |
| CIN1                | 53.5 % | 1.5 % | 2.7 % | 40.1 % | 2.3 %  | 0.0 %  |
| CIN2/3              | 26.2 % | 6.0 % | 9.6 % | 32.4 % | 23.2 % | 2.6 %  |
| Cancer (all stages) | 0.0%   | 0.0%  | 0.0%  | 0.0%   | 0.0%   | 100.0% |

## Follow-up of positive Pap-test, by Pap-test result

|        | Confirmation<br>Pap-test | Confirmation<br>HPV-test | Colposcopy | Conization | Lost to follow-up |
|--------|--------------------------|--------------------------|------------|------------|-------------------|
| ASCUS  | 36,9 %                   | 10,8 %                   | 23,9 %     | 1,3 %      | 27,1 %            |
| ASC    | 36,3 %                   | 0,0 %                    | 48,8 %     | 7,1 %      | 7,8 %             |
| AC     | 6,5 %                    | 0,0 %                    | 30,7 %     | 7,0 %      | 55,9 %            |
| LSIL   | 36,2 %                   | 0,0 %                    | 32,0 %     | 3,5 %      | 28,3 %            |
| HSIL   | 21,4 %                   | 0,0 %                    | 50,1 %     | 19,1 %     | 9,4 %             |
| Cancer | 10,0 %                   | 0,0 %                    | 85,0 %     | 5,0 %      | 0,0 %             |

## Supplementary File 3 Extended model presentation

Due to the complexity of screening algorithms and screening pace depending on the women's history and interactions that exist between screening and individual characteristics, a stochastic microsimulation model based on a Markov methodology and a 1-year cycle length was adapted based on a previously published Markov cohort-based model that has been updated.

Given the importance of individual characteristics, the analysis is based on the simulation of closed cohorts of women eligible for CC screening and representative in terms of age, HPV infection and precancerous and cancerous lesions in order to assess the actual cost-effectiveness of SO implementation in eligible women. Therefore, the results of the model specifically address the efficiency of the various OS strategies assessed and do not allow for epidemiological prediction.

According to the French national health authority (HAS), the model perspective is the collective perspective, meaning that costs borne by all payers are taken into consideration. Costs and survival results are discounted at a 4% annual rate.

The model is programmed in C++. Input data and scenario definition are entered through a Microsoft Excel interface. Model results are then exported to Excel to generate the figures and tables.

### Women generation

The model first generates women with the following characteristics: age (25-56), participant in IndScr, period between carrying out two voluntary IndScr, health state at model initiation and vaccination status. Due to the recent introduction of vaccination, only women aged under 30 can be vaccinated.

### Natural history of CC

Women then initiate the simulation of CC's natural history. At each cycle, non-HPV-infected women can become infected. This infection can spontaneously regress or progress and lead to grade 1 cervical intraepithelial neoplasia (CIN 1). CIN1 lesions can become pre-cancerous (grades 2 and 3 cervical intraepithelial neoplasia, CIN2/3). Once CIN 2/3 lesions have become persistent, they cannot regress spontaneously any longer and can only progress to cancerous lesions of first grade, based on the International Federation of Gynecology and Obstetrics (FIGO) classification. FIGO I CC can progress to grades 2, 3 and 4 and/or become symptomatic, leading to diagnosis of the CC and treatment initiation. Cancer mortality based on cancer severity grade and time since diagnosis is applied to women with symptomatic/diagnosed cancer. Women can die of age-specific general mortality at any state. See figure 1 for the structure of the model.

Considering the age distribution of the cohort and its low adoption in France (17% of women under 30), the effect of vaccination is simulated by applying a relative risk of infection by oncogenic HPV to vaccinated women (i.e. herd immunity is not considered).

### Screening

Each year, the model determines whether the simulated woman performs IndScr based on her status (participant in IndScr or not) and her specific IndScr frequency, both parameters generated at the initiation and updated throughout the simulation. If the woman has not performed a CC screening or received an OS invitation/recall for a period that exceeds the OS periodicity, she receives an invitation to participate. Women that are still NP receive a recall during the same cycle.

Invitation and recall modalities determine different participation probabilities upon receiving. During the screening cycle, IndScr and OS participants perform the screening test determined by the OS

strategy assessed. Test characteristics (sensitivity/specificity) and the screening algorithm determine the result of the primary screening test based on the actual health state of the woman as well as the follow-up actions in case of positive results. Follow-up includes confirmation tests, colposcopy and conizations. Some women become lost to follow-up. Women diagnosed with CC switch to the corresponding diagnosed state.

### Women’s characteristics

The modelled population corresponds to all women aged 25 to 65, that is, all women eligible for IndScr according to current recommendations. Age distribution within the population is based on the national statistics office (INSEE) data.

Twelve percent (12.2%) of the eligible women were found to benefit from the universal complementary health insurance (CMU-c) in an analysis of a representative sample of the French SHI general regimen (employees). Vaccination rate among women aged 25 was based on the last available data which found a 17% uptake among young women since the vaccine became available. Distribution of each modelled health state by age within the population was based on the results of the simulation of a cohort of 14-year-old women. Health-state distribution in the generated cohort at each age is presented in the figure below.

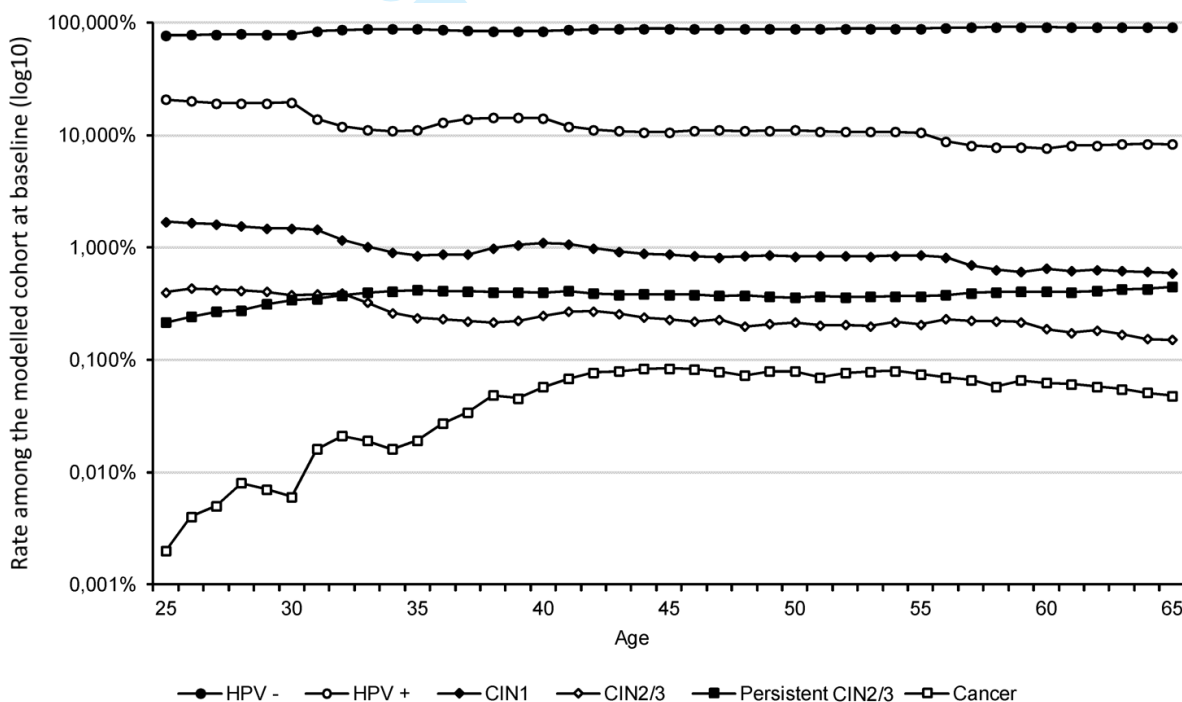

In scenarios based on Pap-test and p16/Ki67, IndScr participation is determined based on the analysis of a sample of the SHI general regimen: at 4 years, 61.9 % of eligible women were found to be participants. At patient generation, a relative risk (RR) of participation is applied to account for the impact of age and universal complementary health insurance (CMU-c). Another analysis of the same dataset provided the observed period between two IndScr (annual to every 10 years, see Supplementary file 3).

Each woman is associated with a SI participation status (Yes/No) and a screening period. Age-dependent probabilities of becoming NP are applied throughout the simulation to account for the lesser participation among older women. These probabilities are determined as follows:

$$P_{become\ non-participant} = (RR_{next\ age-group} / RR_{current\ age-group}) / 5$$

### Transition probabilities

High risk (HR) HPV annual infection rate was estimated to vary from 3.5% and 14% depending on age, in order to fit with the observed HR-HPV prevalence, considering a 50% annual viral clearance rate, according to the model developed by Demarteau *et al.* In younger women, vaccination is modelled through the application of a relative risk of infection taking into account the vaccination rate and decreased infection risk among vaccinated women.

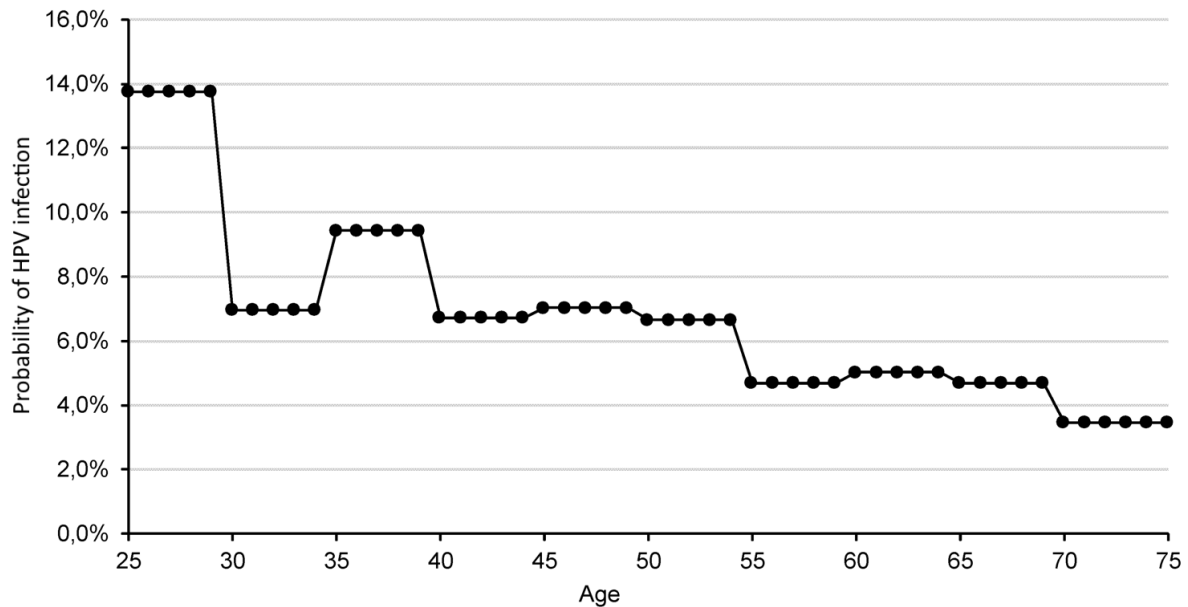

Annual transition probabilities that determine the odds of progression from HPV infection to persistent CIN2/3 precancerous lesion are replicated from the model developed by Demarteau *et al.* and presented in table 2.

Considering the lack of appropriate data, the age-specific progression transition probability of persistent CIN2/3 to FIGO I CC was estimated by calibrating the model to the CC incidence data available. The calibration process consisted in the simulation of a cohort of 14-year-old women, taking the observed IndScr participation rate into account. Transition probabilities were adjusted within a plausible interval in order to duplicate the observed incidence of CC by age. The following figures respectively present the results of the calibration process and the resulting persistent CIN 2/3 to FIGO I CC transition probabilities by age.

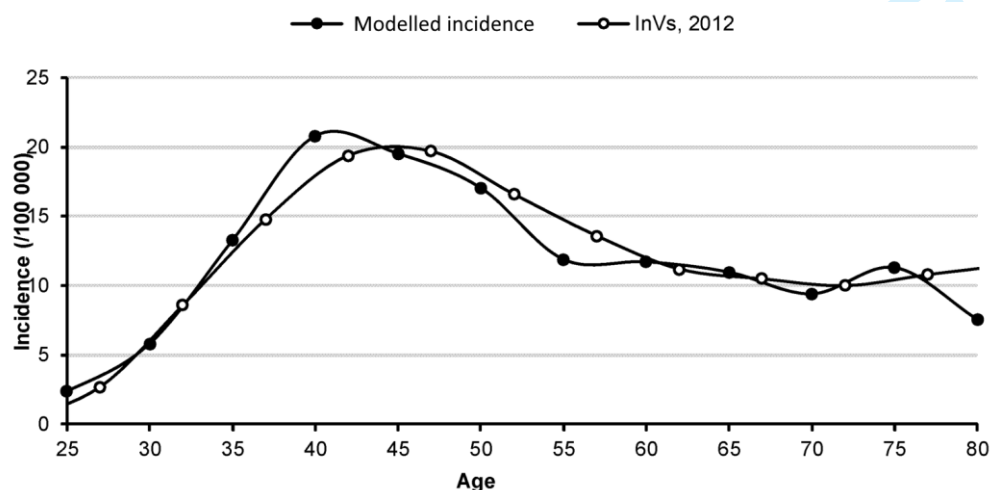

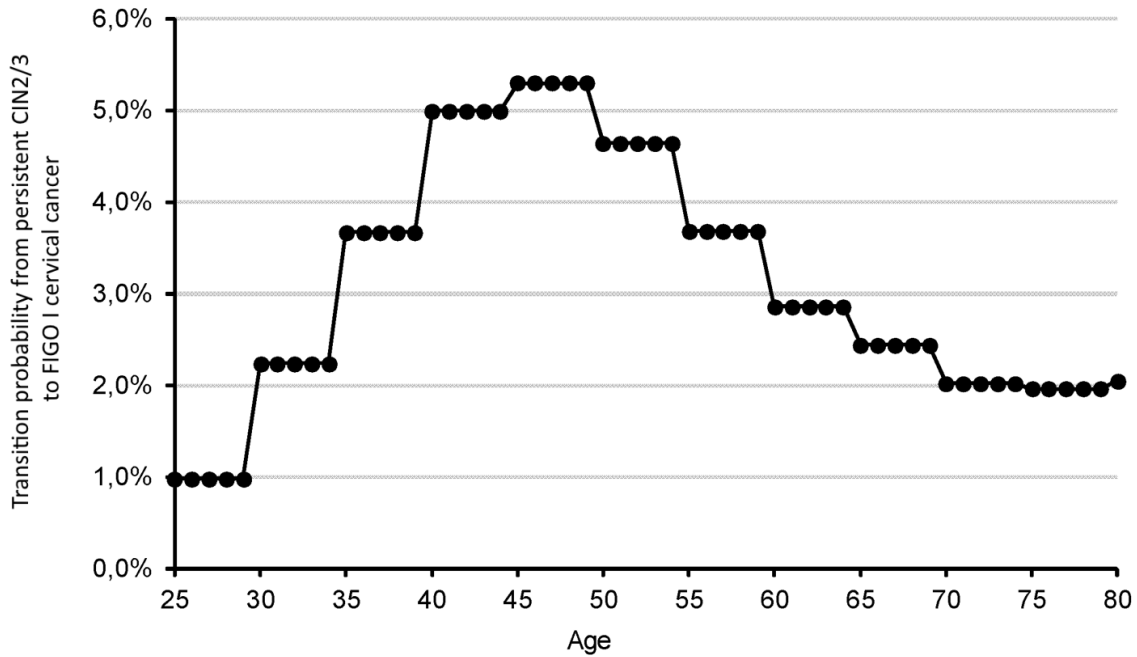

Probabilities of cancer progression and symptom emergence were obtained from the natural history of CC simulation model developed by Myers *et al.*

Cancer mortality by cancer grade and time since diagnosis were obtained from the study by Wright *et al.* based on the estimation of survival among 46,932 women with CC diagnosed from 1983-2009 and recorded in the Surveillance, Epidemiology, and End Results (SEER) database. Survival data for white women under 50 were selected, as mortality by causes other than CC seems unlikely in women under 50. General mortality is modelled according to French national statistics office (INSEE) data.

### Screening

OS participation rates after receiving an invitation or recall are based on the results of local OS experimentations carried out in different regions. The weighted averages of the participation rate upon receiving a mailed invitation or recall letter by the number of Pap-tests performed during each experimentation were respectively found to be 17.3% and 12.1%. Screening test sensitivity and specificity are given in the following table.

| Screening test                   | Sensitivity              | Specificity              | Source          |
|----------------------------------|--------------------------|--------------------------|-----------------|
| Primary Pap-test                 | 70.0 % (57.0 % - 80.0 %) | 95.0 % (92.0 % - 97.0 %) | Mustafa (2015)  |
| Confirmation Pap-test after HPV+ | 85.9 % (76.6 % - 92.1 %) | 65.9 % (63.1 % - 68.6 %) | Bergeron (2015) |
| Primary HPV-test                 | 94.0 % (89.0 % - 97.0 %) | 90.0 % (86.0 % - 93.0 %) | Mustafa (2015)  |
| Confirmation HPV-test after Pap+ | 100.0 % (NR)             | 61.1 % (NR)              | Mayrand (2007)  |
| P16/Ki67                         | 86.7 % (81.1 % - 90.9 %) | 95.2 % (94.9 % - 95.4 %) | Ikenberg (2013) |
| Colposcopy                       | 100.0% (NA)              | 100.0% (NA)              | Assumption      |

At each screening cycle, test performances determine whether women with lesions are screened positive or not depending on their current health state.

Pap-test and p16/Ki67 specificity and specificity are relative to the detection of CIN2/3 and more severe lesions. Women with negative results exit screening, positive results lead to the random draw of an observed lesion type based on the results of the OS experimentation led in the Alsace region (Supplementary file 4).

The action that follows each type of result is then randomly drawn according to the screening algorithms and the results of the OS experimentation led in Alsace. Based on the probabilities reported in Supplementary file 5, the different types of results can lead to further confirmation tests or conisation. Some women become lost to follow-up and exit screening.

|               | Confirmation<br>Pap-test | Confirmation<br>HPV-test | Colposcopy | Conization | Lost to follow-up |
|---------------|--------------------------|--------------------------|------------|------------|-------------------|
| <b>ASCUS</b>  | 36,9 %                   | 10,8 %                   | 23,9 %     | 1,3 %      | 27,1 %            |
| <b>ASC</b>    | 36,3 %                   | 0,0 %                    | 48,8 %     | 7,1 %      | 7,8 %             |
| <b>AC</b>     | 6,5 %                    | 0,0 %                    | 30,7 %     | 7,0 %      | 55,9 %            |
| <b>LSIL</b>   | 36,2 %                   | 0,0 %                    | 32,0 %     | 3,5 %      | 28,3 %            |
| <b>HSIL</b>   | 21,4 %                   | 0,0 %                    | 50,1 %     | 19,1 %     | 9,4 %             |
| <b>Cancer</b> | 10,0 %                   | 0,0 %                    | 85,0 %     | 5,0 %      | 0,0 %             |

In order to take the impact of the screening organization structures into account, OS implementation leads to reduced odds of becoming lost to follow-up after a positive result for both OS and IndScr participants. Based on the Alsace and Indre-et-Loire regional OS experimentation results, a 0.77 RR of becoming lost to follow-up is applied.

Colposcopy is associated with 100% sensitivity and specificity. Therefore, colposcopy results are negative in HPV- and HPV+ women and positive in women with CIN1, CIN2/3 and persistent CIN2/3 lesions. Women with CIN1 proceed to a particular screening algorithm based on recommendations by the French national scientific society of obstetricians and gynaecologists (CNGOF).

HPV-tests and specificity are relative to the detection of HPV+ and more severe lesions. Women with negative results exit screening, positive results lead to a confirmation Pap-test (or p16/Ki67) followed by a colposcopy in case of a new positive result. If negative, a new round of HPV and Pap-tests are performed concomitantly after one year: a positive result for either of them (or both) leads to colposcopy; women with negative-only results exit screening.

Rates of lost to follow-up observed during the START-HPV experimentation (Ardennes region) were used. The lost to follow-up rate after positive confirmation Pap-tests was estimated by subtracting the latter from the average rate of lost to follow-up in HPV+ women observed in the Alsace region OS experimentation (27.7%). Similarly to Pap-based screening, a 0.77 RR of being lost to follow-up is applied in OS-participant women.

| Lost to follow-up after               | Probability | Source                                         |
|---------------------------------------|-------------|------------------------------------------------|
| <b>Positive HPV-test</b>              | 19,4 %      | START-HPV, Ardennes                            |
| <b>Positive confirmation pap-test</b> | 8,3 %       | START-HPV, Ardennes, Alsace OS experimentation |

All samples have odds of being unreadable, depending on the nature of the sample. Women with unreadable samples perform a new test.

A 95% efficacy was considered for conisation. Women with successful conisation go back to the HPV-state. In case of failure, women leave screening in their current state.



## Supplementary File 4 Individual screening participation and periodicity data

| Individual screening frequency | Distribution |
|--------------------------------|--------------|
| Annual                         | 5,9%         |
| 2 years                        | 21,5%        |
| 3 years                        | 18,7%        |
| 4 years                        | 8,6%         |
| 5 years                        | 4,3%         |
| 6 years                        | 2,8%         |
| 7 years                        | 1,8%         |
| 8 years                        | 1,1%         |
| 9 years                        | 0,7%         |
| 10 years                       | 0,5%         |

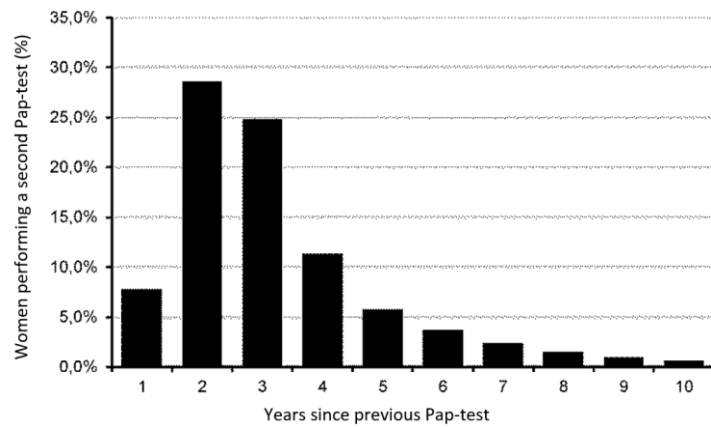

| Population                                                   | RR of participating vs. average | Source                                          |
|--------------------------------------------------------------|---------------------------------|-------------------------------------------------|
| <b>Age</b>                                                   |                                 |                                                 |
| 25 – 30                                                      | 1,06                            | National health insurance database <sup>3</sup> |
| 30 – 35                                                      | 1,08                            | National health insurance database <sup>3</sup> |
| 35 – 40                                                      | 1,07                            | National health insurance database <sup>3</sup> |
| 40 – 45                                                      | 1,04                            | National health insurance database <sup>3</sup> |
| 50 – 55                                                      | 0,92                            | National health insurance database <sup>3</sup> |
| 55 – 60                                                      | 0,82                            | National health insurance database <sup>3</sup> |
| 60 – 65                                                      | 0,77                            | National health insurance database <sup>3</sup> |
| <b>Universal complementary health insurance registration</b> |                                 |                                                 |
| Yes                                                          | 0,80                            | National health insurance database <sup>3</sup> |
| No                                                           | 1,03                            | National health insurance database <sup>3</sup> |

Each woman is associated with an IndScr participation status (Yes/No) and a screening period. Age-dependent probabilities of becoming NP are applied throughout the simulation to account for the lesser participation among older women. These probabilities are determined as follows:

$$P_{become\ non-participant} = (RR_{next\ age-group} / RR_{current\ age-group}) / 5$$

### Supplementary File 5 Model validation results

The model faithfully reproduces cancer incidence, however the modelled CC mortality was slightly higher than observed data, although differences were systematically inferior to 4 per 100,000.

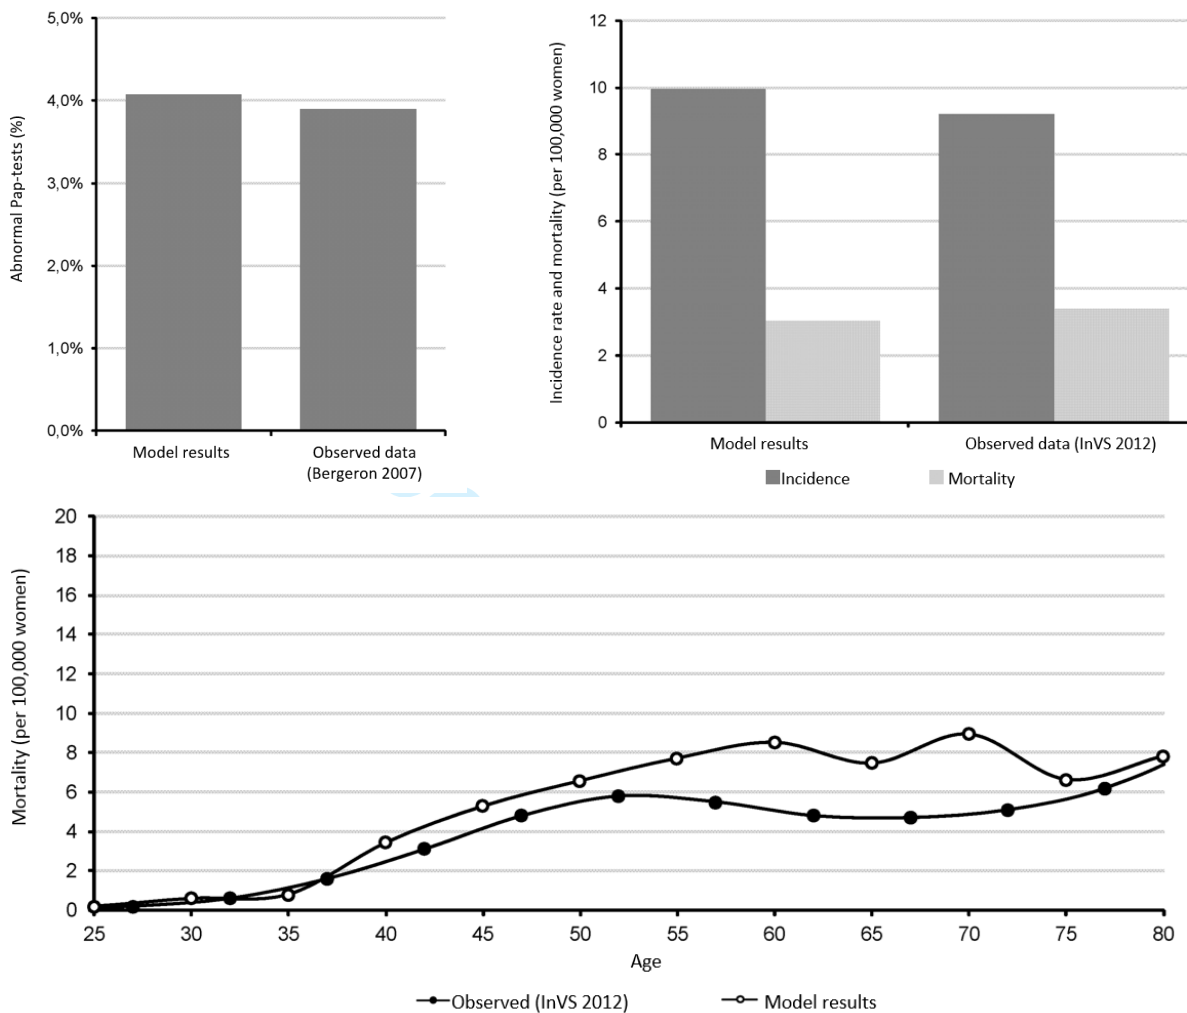

only

## Supplementary File 6 Cost-utility analysis - specific inputs and results

| State                                  | Utility/Utility decrement | Source         |
|----------------------------------------|---------------------------|----------------|
| Age 18-29                              | 0.86                      | Perneger, 2010 |
| Age 30-39                              | 0.86                      |                |
| Age 40-49                              | 0.84                      |                |
| Age 50-59                              | 0.81                      |                |
| Age 60-69                              | 0.8                       |                |
| Age 70-79                              | 0.76                      |                |
| Age 80+                                | 0.74                      |                |
| Diagnosed CIN1                         | -0.01                     |                |
| Diagnosed CIN2/3                       | -0.01                     |                |
| Cervical Cancer (1 <sup>st</sup> year) | -0.27                     | Korfage, 2009  |
| Cervical Cancer (thereafter)           | -0.06                     |                |

| Scénario        | QALY   | Total cost (K€) | ICER (€/LY) vs current | Frontier       |
|-----------------|--------|-----------------|------------------------|----------------|
| IndScr only*    | 16.4   | 122.6           | Reference              | Dominated      |
| Pap/Pap-HPV     | +9.54  | +22.3           | 23,392                 | Dominated      |
| Pap/p16Ki67     | +11.18 | +25.5           | 22,891                 | Dominated      |
| HPV/Pap-3y      | +14.99 | +55.8           | 37,290                 | Dominated      |
| HPV/Pap-5y      | +14.76 | -13.3           | Dominant               | Ext. Dominated |
| HPV/Pap-10y     | +9.44  | -73.4           | Dominant               | Reference      |
| HPV/p16Ki67-5y  | +17.06 | +3.79           | 2,222                  | 131,965        |
| HPV/p16Ki67-10y | +11.88 | -64.6           | Dominant               | 36,468         |
| p16Ki67/p16Ki67 | +17.53 | +160.7          | 91,703                 | 3,302,932      |

\*Reference for other scenarios. Extra-QALY per 10,000 women eligible for OS on a lifetime horizon. QALY: Quality Adjusted Life Years

## Table

Table 1 | CHEERS checklist—Items to include when reporting economic evaluations of health interventions

| Section/item                                           | Item No | Recommendation                                                                                                                                                                                                                                                                                                                                        | Reported on page No/line No |
|--------------------------------------------------------|---------|-------------------------------------------------------------------------------------------------------------------------------------------------------------------------------------------------------------------------------------------------------------------------------------------------------------------------------------------------------|-----------------------------|
| <b>Title and abstract</b>                              |         |                                                                                                                                                                                                                                                                                                                                                       |                             |
| Title                                                  | 1       | Identify the study as an economic evaluation or use more specific terms such as “cost-effectiveness analysis”, and describe the interventions compared.                                                                                                                                                                                               | 1                           |
| Abstract                                               | 2       | Provide a structured summary of objectives, perspective, setting, methods (including study design and inputs), results (including base case and uncertainty analyses), and conclusions.                                                                                                                                                               | 2                           |
| <b>Introduction</b>                                    |         |                                                                                                                                                                                                                                                                                                                                                       |                             |
| Background and objectives                              | 3       | Provide an explicit statement of the broader context for the study.                                                                                                                                                                                                                                                                                   | 3                           |
|                                                        |         | Present the study question and its relevance for health policy or practice decisions.                                                                                                                                                                                                                                                                 | 3/28 - 29                   |
| <b>Methods</b>                                         |         |                                                                                                                                                                                                                                                                                                                                                       |                             |
| Target population and subgroups                        | 4       | Describe characteristics of the base case population and subgroups analysed, including why they were chosen.                                                                                                                                                                                                                                          | Table 2, 6/12 - 18          |
| Setting and location                                   | 5       | State relevant aspects of the system(s) in which the decision(s) need(s) to be made.                                                                                                                                                                                                                                                                  | 4                           |
| Study perspective                                      | 6       | Describe the perspective of the study and relate this to the costs being evaluated.                                                                                                                                                                                                                                                                   | 6/36 - 37                   |
| Comparators                                            | 7       | Describe the interventions or strategies being compared and state why they were chosen.                                                                                                                                                                                                                                                               | Table 1, 4/2 - 20           |
| Time horizon                                           | 8       | State the time horizon(s) over which costs and consequences are being evaluated and say why appropriate.                                                                                                                                                                                                                                              | 5/27 - 28                   |
| Discount rate                                          | 9       | Report the choice of discount rate(s) used for costs and outcomes and say why appropriate.                                                                                                                                                                                                                                                            | 9/6 - 7                     |
| Choice of health outcomes                              | 10      | Describe what outcomes were used as the measure(s) of benefit in the evaluation and their relevance for the type of analysis performed.                                                                                                                                                                                                               | 9/6 - 7                     |
| Measurement of effectiveness                           | 11a     | <i>Single study-based estimates:</i> Describe fully the design features of the single effectiveness study and why the single study was a sufficient source of clinical effectiveness data.                                                                                                                                                            |                             |
|                                                        | 11b     | <i>Synthesis-based estimates:</i> Describe fully the methods used for identification of included studies and synthesis of clinical effectiveness data.                                                                                                                                                                                                | NA                          |
| Measurement and valuation of preference based outcomes | 12      | If applicable, describe the population and methods used to elicit preferences for outcomes.                                                                                                                                                                                                                                                           | NA                          |
| Estimating resources and costs                         | 13a     | <i>Single study-based economic evaluation:</i> Describe approaches used to estimate resource use associated with the alternative interventions. Describe primary or secondary research methods for valuing each resource item in terms of its unit cost. Describe any adjustments made to approximate to opportunity costs.                           |                             |
|                                                        | 13b     | <i>Model-based economic evaluation:</i> Describe approaches and data sources used to estimate resource use associated with model health states. Describe primary or secondary research methods for valuing each resource item in terms of its unit cost. Describe any adjustments made to approximate to opportunity costs.                           | 6/36 - 7/3                  |
| Currency, price date, and conversion                   | 14      | Report the dates of the estimated resource quantities and unit costs. Describe methods for adjusting estimated unit costs to the year of reported costs if necessary. Describe methods for converting costs into a common currency base and the exchange rate.                                                                                        | 7/2 - 3                     |
| Choice of model                                        | 15      | Describe and give reasons for the specific type of decision-analytical model used. Providing a figure to show model structure is strongly recommended.                                                                                                                                                                                                | Figure 1, 5/23 - 26         |
| Assumptions                                            | 16      | Describe all structural or other assumptions underpinning the decision-analytical model.                                                                                                                                                                                                                                                              | Table 2, 5/29 - 7/3         |
| Analytical methods                                     | 17      | Describe all analytical methods supporting the evaluation. This could include methods for dealing with skewed, missing, or censored data; extrapolation methods; methods for pooling data; approaches to validate or make adjustments (such as half cycle corrections) to a model; and methods for handling population heterogeneity and uncertainty. | 8/6 - 12                    |
| <b>Results</b>                                         |         |                                                                                                                                                                                                                                                                                                                                                       |                             |
| Study parameters                                       | 18      | Report the values, ranges, references, and, if used, probability distributions for all parameters. Report reasons or sources for distributions used to represent uncertainty where appropriate. Providing a table to show the input values is strongly recommended.                                                                                   | Table 2, 6/11 - 7/3         |
| Incremental costs and outcomes                         | 19      | For each intervention, report mean values for the main categories of estimated costs and outcomes of interest, as well as mean differences between the comparator groups. If applicable, report incremental cost-effectiveness ratios.                                                                                                                | Tables 3 & 4                |
| Characterising uncertainty                             | 20a     | <i>Single study-based economic evaluation:</i> Describe the effects of sampling uncertainty for the estimated incremental cost and incremental effectiveness parameters, together with the impact of methodological assumptions (such as discount rate, study perspective).                                                                           |                             |

RESEARCH METHODS & REPORTING

(continued)

| Section/item                                                                                                     | Item No | Recommendation                                                                                                                                                                                                                                                             | Reported on page No/line No |
|------------------------------------------------------------------------------------------------------------------|---------|----------------------------------------------------------------------------------------------------------------------------------------------------------------------------------------------------------------------------------------------------------------------------|-----------------------------|
|                                                                                                                  | 20b     | <i>Model-based economic evaluation:</i> Describe the effects on the results of uncertainty for all input parameters, and uncertainty related to the structure of the model and assumptions.                                                                                | Figures 3 & 4               |
| Characterising heterogeneity                                                                                     | 21      | If applicable, report differences in costs, outcomes, or cost-effectiveness that can be explained by variations between subgroups of patients with different baseline characteristics or other observed variability in effects that are not reducible by more information. | Figures 3 & 4; 11/24 - 35   |
| <b>Discussion</b>                                                                                                |         |                                                                                                                                                                                                                                                                            |                             |
| Study findings, limitations, generalisability, and current knowledge                                             | 22      | Summarise key study findings and describe how they support the conclusions reached. Discuss limitations and the generalisability of the findings and how the findings fit with current knowledge.                                                                          | 12 & 13                     |
| <b>Other</b>                                                                                                     |         |                                                                                                                                                                                                                                                                            |                             |
| Source of funding                                                                                                | 23      | Describe how the study was funded and the role of the funder in the identification, design, conduct, and reporting of the analysis. Describe other non-monetary sources of support.                                                                                        | 1                           |
| Conflicts of interest                                                                                            | 24      | Describe any potential for conflict of interest of study contributors in accordance with journal policy. In the absence of a journal policy, we recommend authors comply with International Committee of Medical Journal Editors recommendations.                          | None                        |
| For consistency, the CHEERS statement checklist format is based on the format of the CONSORT statement checklist |         |                                                                                                                                                                                                                                                                            |                             |

For peer review only

1  
2  
3  
4  
5  
6  
7  
8  
9  
10  
11  
12  
13  
14  
15  
16  
17  
18  
19  
20  
21  
22  
23  
24  
25  
26  
27  
28  
29  
30  
31  
32  
33  
34  
35  
36  
37  
38  
39  
40  
41  
42  
43  
44  
45  
46  
47  
48  
49  
50  
51  
52  
53  
54  
55  
56  
57  
58  
59  
60

# BMJ Open

## Organized screening for cervical cancer in France: a cost-effectiveness assessment

|                                 |                                                                                                                                                                                                           |
|---------------------------------|-----------------------------------------------------------------------------------------------------------------------------------------------------------------------------------------------------------|
| Journal:                        | <i>BMJ Open</i>                                                                                                                                                                                           |
| Manuscript ID                   | bmjopen-2016-014626.R3                                                                                                                                                                                    |
| Article Type:                   | Research                                                                                                                                                                                                  |
| Date Submitted by the Author:   | 18-Jul-2017                                                                                                                                                                                               |
| Complete List of Authors:       | Barré, Stéphanie; Institut National du Cancer, Dépistage<br>Masseti, Marc; Public Health Expertise,<br>Leleu, Henri; Public Health Expertise<br>De Bels, Frédéric; Institut National du Cancer, Dépistage |
| <b>Primary Subject Heading</b>: | Health economics                                                                                                                                                                                          |
| Secondary Subject Heading:      | Oncology, Public health, Diagnostics                                                                                                                                                                      |
| Keywords:                       | Health economics < HEALTH SERVICES ADMINISTRATION & MANAGEMENT, Gynaecological oncology < GYNAECOLOGY, PUBLIC HEALTH                                                                                      |
|                                 |                                                                                                                                                                                                           |

SCHOLARONE™  
Manuscripts

Peer review only

## Organized screening for cervical cancer in France: a cost-effectiveness assessment

### Authors:

Barré Stéphanie<sup>1</sup>, Massetti M<sup>2</sup>, Leleu H<sup>2</sup>, De Bels F<sup>1</sup>

1. French National Cancer Institute (INCa), 52 avenue André Morizet, Boulogne Billancourt Cedex, 92513, France.

2. Public Health Expertise, 157 rue du faubourg Saint Antoine, Paris, 75011, France.

### Corresponding author:

Barré Stéphanie, [sbarre@institutcancer.fr](mailto:sbarre@institutcancer.fr), +33 (0) 1 41 10 14 10

**Word count: 3680**

#### French National Cancer Institute

The French National Cancer Institute was established under the Public Health Act of 9 August 2004 as the government health and science agency specialised in cancer control. It is a Public Interest Grouping which brings together State representatives, charities, health insurance funds, hospital federations and research organisations. It is responsible for rolling out the 2014-2019 Cancer Control Plan and reports to the Ministries for Health and for Research.

The Institute provides an integrated approach encompassing all cancer-control dimensions (health, scientific, social and economic) and areas of intervention (prevention, screening, care and research), for the benefit of patients and their relatives.

[www.e-cancer.fr](http://www.e-cancer.fr)

## ABSTRACT

**OBJECTIVE:** According to the third cancer plan, organized screening (OS) of cervical cancer (CC) among women aged 25-65 years should be implemented in France in the forthcoming years. The most efficient way to implement OS in the French health care system is yet to be determined.

**METHODS:** A microsimulation model was developed adopting a collective “all payers” perspective. A closed cohort of women eligible for CC screening and representative in terms of age and participation in individual screening (IndScr) was modelled on a lifetime horizon. Different OS strategies, additive to IndScr with a 61.9% participation rate and based on mailed invitations to non-participant women to perform OS were assessed. Similar modalities were applied to OS and IndScr participants. Strategies implied different screening tests (Papanicolaou (Pap) test, HPV test, and p16/Ki67 double-staining) and OS periodicity.

**RESULTS:** Compared to the current IndScr only situation, all OS strategies were associated with decreased cancer incidence/mortality (from 14.2%/13.5% to 22.9%/25.8%). Most strategies generated extra costs ranging from €37.9 to €1,607 per eligible woman. HPV testing every 10 and 5 years were cost-saving.

HPV tests every 10 and 5 years were the most efficient strategies, generating more survival at lower costs than Pap-based strategies. Compared to IndScr only, an HPV test every 10 years was cost-saving. The most effective strategies were p16/Ki67 as primary or HPV positive confirmation tests, with respective ICERs of €6,541,250 and €101,391 per life year. Pap-based strategies generated intermediary results.

**CONCLUSION:** OS strategies based on the HPV test appear highly efficient. However, our results rely on the assumption that women and practitioners comply with the recommended OS periodicities (3, 5, 10 years). Implementing these OS modalities will require major adaptations to the current CC screening organization. Pap-test based strategies might be simpler to set-up while preparing an appropriate implementation of more efficient OS screening modalities.



### STRENGTHS AND LIMITATIONS OF THE STUDY

- A microsimulation model was developed to assess the efficiency of possible cervical cancer organized screening strategies in France.
- The model operates on individual women who are eligible for screening and representative of the current French population on a lifetime horizon.
- Real-life practices and data were used, allowing for the fine modelling of the screening and validation against observed data.
- The lack of precision of transition probabilities in the context of a low incidence of cervical cancer, as well as the assumptions required to model screening practices after primary HPV tests, are the main limitations of the study.

For peer review only

## BACKGROUND

The natural history of cervical cancer (CC) is related to a persistent HPV infection of the cervix leading to squamous intraepithelial lesions that can evolve into cancerous lesions. CC prevention is based on screening to detect and remove lesions at the early stages to prevent invasive cancer and an anti-HPV vaccination to reduce cancer-associated HPV infection.[1]

In France, CC prevention is based on individual voluntary screening (IndScr) for CC of women aged 25 to 65 years and vaccination. IndScr is based on a Papanicolaou test (Pap test) every 3 years, after two annual Pap tests that are negative. Approximately 90% of Pap smears are done by gynaecologists, although general practitioners (GP) and midwives are also authorized to perform it. IndScr has led to a significant decrease in the incidence and associated mortality of CC in the past 20 years. In 2012, CC was the 11<sup>th</sup> most frequent and 12<sup>th</sup> most lethal form of cancer in women.[2] However, many women still do not participate in CC screening. Participation in IndScr was found to be approximately 61% of eligible women, with low access to healthcare, comorbidities and poverty being risk factors for non-participation.

Screening remains the main prevention tool in France, as anti-HPV vaccination is restricted to younger age groups and was only recently made available. Furthermore, vaccination has had a slow adoption in the French population. In 2015, it was estimated that only 17% of women eligible for vaccination were vaccinated.[3;4] In 2014, the third French Cancer Plan has been presented to address both the human and the societal challenges of cancer. CC organized screening (OS) implementation among women aged 25-65 years is part of its first operational objective and aims at a participation rate of 80% and a 30% reduction in CC-related mortality by 2019.[5]

Several OS experimentations have been performed in France to assess the efficacy of different screening modalities, including invitation and positive tests follow-up (FU), self-sampling and HPV-testing. Experimentations that consisted of an invitation of non-participants to perform a Pap test allowed to catch up with 13.2% of all eligible women after 3 years and reduced the lost to follow-up (LtFU) rates of women after a positive result.[6] Additionally, primary HPV-testing and self-sampling were shown to be a feasible alternative to the Pap smear in France.[7;8] Finally, innovative testing, such as p16/Ki67 double-staining, was shown to be a performant alternative for CC screening compared to HPV screening or the Pap test.[9]

Consequently, many alternative strategies can be considered for the implementation of OS for CC in France. Thus, a medico-economic evaluation of several OS strategies based on a cost-effectiveness analysis was performed by the French national cancer institute (INCa), which relied on a scientific steering committee that involved clinical experts and stakeholder representatives (social security, ministry of health, patients and professionals) providing advice on the methodological choices and best OS implementation modality in the French context.

In order to assist decision-making regarding the implementation of CC OS, our study's main outcomes correspond to the objectives of CC OS implementation: participation rate, survival and avoided CC. A cost-utility analysis was performed as well.

## METHODS

Seven strategies were compared to the current IndScr-only situation (table 1). These strategies were all based on adding to the current IndScr with the dispatch of screening invitations (followed by a single recall) to women who did not spontaneously participate in the last 3 years (non-participants). Hence, women who did not participate in regular screening are the only ones targeted by the interventions. OS strategies also included improved FU, resulting in a reduction in LtFU women.

Different screening tests were considered for primary screening or confirmation after a positive primary test, including Pap test, HPV DNA detection and p16/Ki67 double-staining. The women who tested positive for both primary and confirmation tests went through colposcopy and conization if a high-grade (grade 2 or worse [CIN2+]) cervical intraepithelial neoplasia (CIN) lesion was identified. Women with CIN1 were retested at 12, 18 and 24 months if the initial lesion was atypical squamous cells of undetermined significance (ASC-US) or low-grade squamous intraepithelial lesion (LSIL) on Pap, or went through colposcopy. The women who tested positive for a primary test and negative for confirmation were retested after one year. A fraction of the participants was LtFU. Women could only be invited once per cycle. Detailed screening algorithms are available in supplementary file 1.

The population was limited to women aged 25-65 years who are currently eligible for IndScr.

Table 1 Strategies compared

| Strategy         | IR + Improved Follow-up | Primary test       | Confirmation test after positive primary test |
|------------------|-------------------------|--------------------|-----------------------------------------------|
| Current          | No                      | Pap-test / 3 years | Pap-test or HPV                               |
| Pap/Pap          | Yes                     | Pap-test / 3 years | Pap-test                                      |
| Pap/p16Ki67      | Yes                     | Pap-test / 3 years | p16/Ki67                                      |
| HPV/Pap-5y†      | Yes                     | HPV / 5 years      | Pap-test                                      |
| HPV/Pap-3y†      | Yes                     | HPV / 3 years      | Pap-test                                      |
| HPV/Pap-10y†     | Yes                     | HPV / 10 years     | Pap-test                                      |
| HPV/p16Ki67-5y†  | Yes                     | HPV / 5 years      | p16/Ki67                                      |
| HPV/p16Ki67-10y† | Yes                     | HPV / 10 years     | p16/Ki67                                      |
| p16Ki67/p16Ki67  | Yes                     | HPV / 3 years      | p16/Ki67                                      |

IR: invitation + recall for woman who did not participate in IndScr in the last 3 years (non-participant)

†: women 25-35 are not eligible for HPV screening and receive a Pap-test every 3y instead. Women who tested HPV+/confirmation- go through double testing (HPV + Pap) the following year.

## MODEL STRUCTURE

Given the complexity of screening algorithms (different testing/retesting frequencies) and interactions between participation rates and individual characteristics (age and social), a Markov state microsimulation model was developed. Considering the relatively slow progression of intraepithelial lesions and the long-term benefits of screening, a 1-year cycle-length was used. The model was adapted from a previously published cohort-based Markov model.[10] A cohort of 100,000 women was simulated. Due to the long-term development of the disease and its consequences, a lifetime horizon was applied.

The model first generates a woman with a randomly attributed age, IndScr participation and frequency, health state (HPV-, HPV+, CIN lesions or cancer) and vaccination attributes. At each cycle, women can progress through states that correspond to CC natural history: non-infected women can get an HPV infection according to an age- and vaccination-dependent risk. The infection can progress to CIN1, then CIN2/3 and finally FIGO 1 (Federation of Gynecology and Obstetrics) classified non-invasive cancer. HPV infection and CIN lesions can regress spontaneously until CIN2/3 lesions have become persistent (pCIN2/3). Women in the pCIN2/3 state systematically progress to cancer at an

1  
2  
3 age-dependant rate. FIGO1 lesions can progress to FIGO 2, 3 and 4 and become symptomatic. Once  
4 symptomatic, the lesion is treated and the woman remains in the corresponding treated state with  
5 an associated cancer mortality rate. An age-specific general mortality applies at any state.  
6

7 Each year, the model determines whether the woman undergoes screening individually or after  
8 invitation based on her participation periodicity, time since last screening and participation rates  
9 after invitation. Invitations are sent to non-participant women in the manner of prevention  
10 campaigns, following the screening recommended frequency (i.e. 3 years in the case of Pap/Pap).  
11 Therefore, only a fraction of non-participant women are invited every year. The same primary  
12 screening modality is applied to OS and IndScr participants. Screening test results (positivity and  
13 lesion type for Pap tests and positivity for HPV and p16/Ki67) are determined based on the current  
14 state and type of test performed (supplementary file 2). After diagnosis, women with a non-  
15 cancerous lesion return to the non-infected state after conization and cancerous lesions are treated.  
16 The structure of the modelled natural history is presented in figure 1. More details on the model  
17 structure are given in the supplementary file 3.  
18  
19

## 20 INPUT DATA

21 The input data used in the simulation are presented in table 2.  
22

23 The population characteristics are based on available epidemiologic and demographic data that are  
24 representative of the French population. Vaccination status is only determined in women  $\leq 30$  years  
25 old, as it was only recently available in France. IndScr participation and frequency depend on age and  
26 social status, and based on the national health insurance database (supplementary file 4),  
27 approximately 61.9 % of eligible women were found to participate in IndScr at a frequency  $\leq 4$   
28 years.[3] Distribution of each modelled health state by age was not available in France and was  
29 estimated by simulating a cohort of non-vaccinated 14-year-old women undergoing current IndScr-  
30 only screening over their lifetime (supplementary file 3).  
31  
32

33 Transition probabilities (TP) were based on a previously published model.[10] The HPV infection and  
34 pCIN2/3 to cancer progression probabilities were calibrated using the model to reproduce observed  
35 HPV and cancer prevalence by age.[1;11] The high-risk HPV annual infection rate was estimated to be  
36 3.5% to 14%, depending on age.[12] The impact of vaccination is simulated by applying a relative risk  
37 (RR) of infection.[1]  
38

39 Probabilities of cancer progression and emergence of symptoms were obtained from the CC natural  
40 history simulation model developed by Myers *et al.*[13] The cancer specific-mortality by grade and  
41 time since diagnosis was estimated from SEER using data for white women under 50, as it was  
42 assumed that non-specific mortality was low in this group.[14] General mortality was modelled  
43 according to the French national statistics office (INSEE) data.  
44

45 The participation rates after invitation and recall, LtFU rate associated with IndScr, OS effect on LtFU  
46 (RR=0.88), observed lesions on Pap smear and associated care were all based on observational data  
47 from French OS experimentations.[1]  
48

49 The sensitivity and specificity of screening tests were based on clinical studies for detecting CIN2/3  
50 lesions and took into account the test sequence (i.e., HPV after Pap or primary HPV).[9;15-17] One  
51 percent of Pap tests were non-interpretable, which led to a retest.[18] Colposcopy was assumed to  
52 have 100% sensitivity and specificity. A 95% efficacy was considered for conization.  
53  
54

55 The model estimated OS cost and direct medical costs from a collective, "all payers" perspective, as  
56 recommended for France.[19] The OS costs covered invitations and recalls, as well as database  
57  
58  
59  
60

management, tracking of women's participation and FU management. Cost data for consultations and medical care were based on national tariffs. No extra-consultation costs were added, as it was considered that IndScr participants did so during a routine consultation. The HPV-analysis tariff was decreased by 60% in strategies with primary HPV-testing, assuming a substantial cost reduction in cases of an adoption of HPV-testing based OS. This assumption was validated by health insurance and health ministry representatives. According to public-health law, no extra co-payment is applied to OS participants. Cancer states were associated with costs accounting for care and FU by FIGO stage [12] when entering the corresponding diagnosed state. All costs were updated to 2016, using the national consumer price index for healthcare goods and services.

Table 2 Input data

| Parameter                         | Value                                              | Distribution | Source                                                                                                                                          |
|-----------------------------------|----------------------------------------------------|--------------|-------------------------------------------------------------------------------------------------------------------------------------------------|
| <b>Demographic</b>                |                                                    |              |                                                                                                                                                 |
| Age                               | 25 - 65<br>Based on distribution                   | NA           | National Statistics (INSEE)                                                                                                                     |
| CMU-c Eligibility (social status) | 12.2 % (9.8% - 14.6%)                              | Normal       | National Health Insurance Data                                                                                                                  |
| IndScr participation periodicity  | Based on frequency distribution, age and social    | Uniform      | National Health Insurance Data                                                                                                                  |
| Initial Health State              | Based on distribution                              | NA           | Based on model prediction for a cohort of 14-year-old women                                                                                     |
| <b>Transition probabilities</b>   |                                                    |              |                                                                                                                                                 |
| HR-HPV infection                  | 0.03 - 0.15 (0.03 - 0.18)<br>Based on distribution | Beta         | Estimated to reproduce known prevalence by age [12]                                                                                             |
| HPV-infection regression          | 0.50 (0.40 - 0.60)                                 | Beta         | Riethmuller et al. (1999)[19], Clavel et al. (2001)[20], Boulanger et al. (2004)[21], Beby-Defaux et al. (2004)[22], Dalstein et al. (2004)[23] |
| HR-HPV Infection → CIN 1          | 0.05 (0.04 - 0.06)                                 | Beta         | Moscicki et coll. (2001)[24]                                                                                                                    |
| CIN1 Regression                   | 0.50 (0.40 - 0.60)                                 | Beta         | Melnikow et coll. (1998)[25], Nobbenhuis et coll. (2001)[26], Sanders and Taira (2003)[27], Van De Velde et coll. (2007)[28]                    |
| CIN1 → CIN 2/3                    | 0.12 (0.10 - 0.14)                                 | Beta         | Melnikow et coll. (1998)[25], Sanders and Taira (2003)[27], Van De Velde et coll. (2007)[28]                                                    |
| CIN2/3 Regression                 | 0.28 (0.22 - 0.33)                                 | Beta         | Melnikow et coll. (1998)[25]                                                                                                                    |
| CIN2/3 → pCIN 2/3                 | 0.13 (0.10 - 0.15)                                 | Beta         | Melnikow et coll. (1998)[25]                                                                                                                    |
| Persistent CIN 2/3 → FIGO I       | 0.01 - 0.05 (0.01 - 0.06)<br>Based on distribution | Beta         | Estimated to reproduce known prevalence by age[1.11]                                                                                            |
| FIGO I → FIGO II                  | 0.20 (0.16 - 0.24)                                 | Beta         | Myers et al. 2000[13]                                                                                                                           |
| FIGO II → FIGO III                | 0.26 (0.21 - 0.31)                                 | Beta         | Myers et al. 2000[13]                                                                                                                           |
| FIGO III → FIGO IV                | 0.36 (0.29 - 0.43)                                 | Beta         | Myers et al. 2000[13]                                                                                                                           |
| FIGO I → Symptomatic FIGO I       | 0.15 (0.12 - 0.18)                                 | Beta         | Myers et al. 2000[13]                                                                                                                           |
| FIGO II → Symptomatic FIGO II     | 0.23 (0.18 - 0.27)                                 | Beta         | Myers et al. 2000[13]                                                                                                                           |
| FIGO III → Symptomatic FIGO III   | 0.60 (0.48 - 0.71)                                 | Beta         | Myers et al. 2000[13]                                                                                                                           |
| FIGO VI → Symptomatic FIGO IV     | 0.90 (0.67 - 1.00)                                 | Beta         | Myers et al. 2000[13]                                                                                                                           |
| 1-year Cancer Survival            | 0.43 - 0.98 (0.23 - 0.99)<br>By stage              | Beta         | SEER[14]                                                                                                                                        |
| 5-year Cancer Survival            | 0.14 - 0.94 (0.06 - 0.97)<br>By stage              | Beta         | SEER[14]                                                                                                                                        |
| 10-year Cancer Survival           | 0.05 - 0.93 (0.01 - 0.96)<br>By stage              | Beta         | SEER[14]                                                                                                                                        |
| <b>Screening</b>                  |                                                    |              |                                                                                                                                                 |
| Participation after invitation    | 17.3% (10.0% - 24.0%)                              | Uniform      | Hamers et al. 2014[6]                                                                                                                           |
| Participation after recall        | 12.1% (5.0% - 18.0%)                               | Uniform      | Hamers et al. 2014[6]                                                                                                                           |
| Lost to follow-up with IndScr     | Based on lesion on Pap.<br>Average 27.7%           | NA           | Hamers et al. 2014[6]                                                                                                                           |

|                                           |                                |         |                                                                                   |
|-------------------------------------------|--------------------------------|---------|-----------------------------------------------------------------------------------|
| Reduction in lost to follow-up with OS    | 0.77 (0.08 – 0.77)             | Uniform | OS experimentations, INCA personal communication                                  |
| Lesions on PAP                            | Distribution                   | NA      | Hamers <i>et al.</i> 2014[6]                                                      |
| Care per lesion                           | Distribution                   | NA      | Hamers <i>et al.</i> 2014[6]                                                      |
| Primary Pap-test (Se)                     | 70.0 % (57.0 % - 80.0 %)       | Beta    | Mustafa <i>et al.</i> (2015)[15]                                                  |
| Confirmation Pap-test after HPV+ (Se)     | 85.9 % (76.6 % - 92.1 %)       | Beta    | Bergeron <i>et al.</i> (2015)[9]                                                  |
| Primary HPV-test (Se)                     | 94.0 % (89.0 % - 97.0 %)       | Beta    | Mustafa <i>et al.</i> (2015)[15]                                                  |
| Confirmation HPV-test after Pap+ (Se)     | 100.0 % (NR)                   | NA      | Mayrand <i>et al.</i> (2007)[17]                                                  |
| p16/Ki67 (Se)                             | 86.7 % (81.1 % - 90.9 %)       | Beta    | Ikenberg <i>et al.</i> (2013)[16]                                                 |
| Colposcopy (Se)                           | 100.0% (NA)                    | NA      | Assumption                                                                        |
| Primary Pap-test (Sp)                     | 95.0 % (92.0 % - 97.0 %)       | Beta    | Mustafa <i>et al.</i> (2015)[15]                                                  |
| Confirmation Pap-test after HPV+ (Sp)     | 65.9 % (63.1 % - 68.6 %)       | Beta    | Bergeron <i>et al.</i> (2015)[9]                                                  |
| Primary HPV-test (Sp)                     | 90.0 % (86.0 % - 93.0 %)       | Beta    | Mustafa <i>et al.</i> (2015)[15]                                                  |
| Confirmation HPV-test after Pap+ (Sp)     | 61.1 % (NR)                    | NA      | Mayrand <i>et al.</i> (2007)[17]                                                  |
| p16/Ki67 (Sp)                             | 95.2 % (94.9 % - 95.4 %)       | Beta    | Ikenberg <i>et al.</i> (2013)[16]                                                 |
| Colposcopy (Sp)                           | 100.0% (NA)                    | NA      | Assumption                                                                        |
| Conisation efficacy                       | 95.0%                          | NA      | Assumption                                                                        |
| Non-interpretable tests                   | 1.0% (1.0% - 3.0%)             | Uniform | Hamers <i>et al.</i> 2014[6]                                                      |
| <b>Costs (€)</b>                          |                                |         |                                                                                   |
| Pap-test (IndScr)                         | 47.78 (38.88 – 57.59)          | Gamma   | National tariffs                                                                  |
| Pap-test (OS)                             | 49.62 (40.37 – 59.81)          | Gamma   | National tariffs                                                                  |
| p16/Ki67 (IndScr)                         | 86.77 (70.60 - 104.58)         | Gamma   | National tariffs                                                                  |
| p16/Ki67 (OS)                             | 88.61 (72.09 - 106.80)         | Gamma   | National tariffs                                                                  |
| HPV-test (IndScr)                         | 47.70 (75.48 - 97.17)          | Gamma   | National tariffs                                                                  |
| HPV-test (OS)                             | 49.54 (49.54 - 71.24)          | Gamma   | National tariffs                                                                  |
| Confirmation Pap-test (IndScr)            | 78.17 (63.60 - 94.21)          | Gamma   | National tariffs                                                                  |
| Confirmation Pap-test (OS)                | 49.63 (40.38 - 59.82)          | Gamma   | National tariffs                                                                  |
| Confirmation p16/Ki67 (IndScr)            | 116.77 (78.09 - 99.57)         | Gamma   | National tariffs                                                                  |
| Confirmation p16/Ki67 (OS)                | 88.23 (71.79 - 106.34)         | Gamma   | National tariffs                                                                  |
| Confirmation HPV-test (IndScr)            | 78.09 (63.53 - 94.12)          | Gamma   | National tariffs                                                                  |
| Confirmation HPV-test (OS)                | 49.55 (49.55 - 71.03)          | Gamma   | National tariffs                                                                  |
| Colposcopy                                | 49.82 (40.54 - 60.05)          | Gamma   | National tariffs                                                                  |
| Conization                                | 93.42 (76.01 - 112.60)         | Gamma   | National tariffs                                                                  |
| FIGO I CC treatment                       | 1041.95 (847.77 - 1255.85)     | Gamma   | Dervaux <i>et al.</i> 2007[12]                                                    |
| FIGO II CC treatment                      | 1818.86 (1479.90 - 2192.25)    | Gamma   | Dervaux <i>et al.</i> 2007[12]                                                    |
| FIGO III CC treatment                     | 25817.84 (21006.43 - 31117.97) | Gamma   | Dervaux <i>et al.</i> 2007[12]                                                    |
| FIGO IV CC treatment                      | 30582.83 (24883.41 - 36861.16) | Gamma   | Dervaux <i>et al.</i> 2007[12]                                                    |
| Database management + Invitation dispatch | 7.00 (4.00 – 11.00)            | Gamma   | Cost of invitation to colorectal OS (Heath Ministry data, personal communication) |
| Recall dispatch                           | 0.40 (0.40 – 3.25)             | Gamma   | 50% postal charges                                                                |

## VALIDATION

The model results were compared to observed epidemiological data for validation. The model faithfully reproduces cancer incidence and CC mortality in France.[12] Results of the model validation are available in supplementary file 5.

## COST-EFFECTIVENESS ANALYSES

Incremental cost-effectiveness ratios (ICER) were calculated for the life expectancy. Costs and survival were discounted at 4% per year, according to French guidelines for cost-effectiveness studies.[18]

Several alternative scenarios were tested, including not applying the efficacy of OS on LtfU rate, not considering a reduction in HPV cost, and assuming a 60% reduction in p16/Ki67 cost.

The robustness of the model was tested using deterministic sensitivity analysis (DSA). In the DSA, all of the parameters were tested at their confidence intervals (or at  $\pm 20\%$  of the baseline value when the confidence intervals were not available).

## RESULTS

Compared with the current situation, invitation and recall of non-participant women led to an increase from 61.9% to 65.5% in the 4-year participation rate. Every strategy that was tested was associated with a reduction in cancer incidence/mortality, ranging from -14.2%/-13.5% for the Pap/Pap strategy to -22.9%/-25.8% for the HPV/p16Ki67-5y strategy. The undiscounted results are presented in table 3.

Table 3 Undiscounted results

| Scenario        | Outcomes |                  | Costs (€) per woman |           |                       |         |
|-----------------|----------|------------------|---------------------|-----------|-----------------------|---------|
|                 | Cancer   | Cancer mortality | OS organisation     | Screening | CC care & conizations | Total   |
| IndScr only*    | 34       | 13               | 0                   | 294.2     | 30.9                  | 325.0   |
| Pap/Pap         | -14.2%   | -13.5%           | +19.57              | +13.32    | -3.92                 | +28.97  |
| Pap/p16Ki67     | -16.6%   | -15.9%           | +19.57              | +18.46    | -4.57                 | +33.46  |
| HPV/Pap-3y      | -21.1%   | -22.4%           | +15.16              | +99.87    | -7.31                 | +107.73 |
| HPV/Pap-5y      | -18.9%   | -22.5%           | +15.12              | -29.79    | -7.24                 | -21.91  |
| HPV/Pap-10y     | -8.0%    | -13.6%           | +14.94              | -14.42    | -0.48                 | -134.04 |
| HPV/p16Ki67-5y  | -22.9%   | -25.8%           | +15.10              | +1.57     | -0.81                 | +8.55   |
| HPV/p16Ki67-10y | -11.9%   | -17.0%           | +14.93              | -129.7    | -5.87                 | -120.63 |
| p16Ki67/p16Ki67 | -24.3%   | -24.4%           | +19.57              | +233.30   | -6.87                 | +246.00 |

\*Reference for other scenarios. Cumulated incidence and mortality for 10,000 women eligible for OS on a lifetime horizon.

The average undiscounted cost of screening for the modelled population over a lifetime was €325 per eligible woman, most of which was imputable to screening (€294). Strategies based on HPV-testing with 5-year and 10-year frequencies were cost-saving (-€22 and -€134 per woman, respectively), despite the additional cost of OS (€15). Other strategies were responsible for extra costs, ranging from €29 to €33 for Pap-based screening to €108 for HPV/Pap-3y and €246 for p16Ki67/p16Ki67.

Although it was the cheapest strategy (€191 per eligible woman), HPV/Pap-10y was the strategy with the smallest cancer reduction (-11.9%), as opposed to p16Ki67/p16Ki67, which led to a 25% reduction in CC while being the most expensive strategy (€571 per eligible woman). Figure 2 presents the mean cost per woman and cancer reduction rate for each strategy.

Discounted survival is consistent with CC incidence and mortality (table 4). Compared to the current situation (19.4 LY survival), OS strategies led to an increase in survival, ranging from 10 years per 10,000 women for the Pap/Pap and HPV/Pap-10y strategies to 18 years per 10,000 women for the HPV/p16Ki67 and p16Ki67/p16Ki67 strategies. Discounted extra costs per 10,000 eligible women ranged from €38,000 (HPV/Pap-5y) to €1,608,000 (p16Ki67/p16Ki67). HPV/Pap-5y and HPV/Pap-10y remained cost-saving after discounting. Hence, these strategies were more effective and more cost-saving than Pap-based strategies, including the current situation, and were the dominant OS strategies. HPV/p16Ki67-5y and p16Ki67/p16Ki67 were more effective than HPV/Pap-5y and HPV/Pap-10y with ICERs of €101,391 and €6,541,250 per LY, respectively. HPV/Pap-3y was as effective as HPV/Pap-5y but less effective than HPV/p16Ki67-5y while generating much more expenses.

Table 4 Discounted results

| Scenario        | Survival (LY) | Total cost (K€) | ICER (€/LY) vs current | Frontier       |
|-----------------|---------------|-----------------|------------------------|----------------|
| IndScr only*    | 19.4          | 122.6           | Reference              | Dominated      |
| Pap/Pap-HPV     | +10.04        | +22.3           | 22,234                 | Dominated      |
| Pap/p16Ki67     | +11.68        | +25.5           | 21,918                 | Dominated      |
| HPV/Pap-3y      | +15.93        | +55.8           | 35,095                 | Dominated      |
| HPV/Pap-5y      | +15.89        | -13.3           | Dominant               | Ext. Dominated |
| HPV/Pap-10y     | +10.51        | -73.4           | Dominant               | Reference      |
| HPV/p16Ki67-5y  | +18.13        | +3.79           | 2,091                  | 101,389        |
| HPV/p16Ki67-10y | +13.00        | -64.6           | Dominant               | 35,846         |
| p16Ki67/p16Ki67 | +18.37        | +160.7          | 87,546                 | 6,592,441      |

\*Reference for other scenarios. Extra-survival per 10,000 women eligible for OS on a lifetime horizon. LY: Life Years

Regardless of the modality, implementing an OS programme for cervical cancer in France led to an overall improvement in the CC screening rate and a reduction in CC incidence and mortality. Reducing LtFU rates and improving screening rates with invitations/recall as in the Pap/Pap scenario results in an ICER of €22,231 per LY and an average extra survival of 10 LY per 10,000 eligible women.

Switching primary screening from the Pap-test to HPV-testing led to similar LY gains with a 10-year screening frequency, yet the 5-year frequency led to a longer survival (15.89 vs. 10.51 LY per 10,000 eligible women). Furthermore, reducing the frequency of primary testing was cost-saving, even at the current cost of HPV-testing. Despite the longer interval between the two screening tests, HPV-based strategies remained effective because of their superior sensitivity compared to the Pap-test.

The very good sensitivity/specificity of p16/Ki67 double-staining used as a primary screening test led to significant survival gains compared to the current situation and HPV-testing (+18.37 and +2.48 per 10,000 eligible women, respectively). However, its high cost made it inefficient, with an ICER of €6,592,441/LY.

Switching the Pap test with p16/Ki67 double-staining in the confirmation of positive Pap and HPV primary tests increased efficacy and led to moderate additional costs. The confirmation of HPV tests every 10 years increased the survival from +10.51 to +13.0 LY and the costs from -€734,000 to -€646,000 per 10,000 eligible women. Thus, the HPV/p16Ki67-10y scenario was associated with an ICER of €35,846/LY. The cost-utility results do not lead to different conclusions. A cost-utility analysis was performed by applying specific health utilities to the health states and utility decrements to non-cancerous and cancerous states. Its results and the utility values used are available in a supplementary file 6.



## SENSITIVITY AND SCENARIO ANALYSES

Deterministic sensitivity analysis and scenario analyses for HPV/Pap-10y versus the current situation for LY and costs are shown in figures 3 and 4, respectively.

The parameters with the biggest impact were the cost of testing (HPV and Pap) and OS effect on LtFU rate after a positive result. However, HPV/Pap-10y systematically remained the most cost-effective alternative. The mean age of the cohort impacted results drastically, despite HPV screening being less beneficial in women under 30 years old and over 50 years old than in the rest of the eligible population. Vaccination rates up to 80% had a negligible impact. Similar results were seen for HPV/Pap-5y and HPV/p16Ki67-5y scenarios. Not taking into account the effect of OS on LtFU rate did not change the conclusion, although it significantly reduced the LY gains compared to in the IndScr only. Similarly, not considering a reduction in the cost of the HPV test led to similar conclusions: HPV/Pap-10y and HPV/Pap-5y remained less costly than the alternative strategies. Finally, a 60% reduction in p16/Ki67 cost led to a decreased total cost of €41.05 (-75%) for the p16Ki67/p16Ki67 scenario.

## DISCUSSION

Using a validated microsimulation model that allows for the fine modelling of screening modalities, we showed that the OS programme for cervical cancer in France leads to a reduction of CC incidence and mortality. HPV-based screening with 5- or 10-year frequencies would be cost-saving, and other modalities would generate extra costs ranging between €37.9 and €1,607 per woman.

Most model inputs were based on observed “real-life” data instead of simple screening guidelines. This allows for an accurate simulation of women’s screening behaviour by considering that many women do not comply with the recommended screening frequency and that older women tend to drop out of screening.[3] This also allowed for the implementation of current professional practices that significantly differ from recommended screening algorithms: in the current IndScr only situation, after a positive Pap test, not all women proceed to confirmation (Pap or HPV test), as some directly undergo colposcopy or conization, depending on the identified lesion with a significant impact on IndScr efficiency. Finally, the model incorporates LtFU rates, which proved to be a key factor in OS efficacy, particularly when screening frequency was superior to 5 years.[6]

The model’s main limitations stem from the estimation of the transition probabilities (TP). An initial literature review showed important variations between sources with some TP being not available. Additionally, the identified TP were not precise enough given the low incidence of lesions in the general population of women (1 in 10,000). Thus, we favoured sources that had previously been used in French models to allow comparability with previously published results.[10.12] Additionally, the model was calibrated on available prevalence data in France and externally validated. Furthermore, the sensitivity analyses showed that, despite the uncertainty, TP variations had a limited impact on the results, which reinforces our confidence in the estimations. Finally, our results are comparable to previously published European studies: Accetta *et al.* have found that an HPV test every 5 years is more effective and less costly than triennial Pap-tests in Italy.[29] The decreased efficiency of CC screening based on the HPVtest at lower frequencies was shown by Berkhof *et al.* in the Netherlands.[30] In Norway, Burger *et al.* found results comparable to ours for the Pap/Pap strategy.[31]

In our analysis, HPV/Pap-10y was the most efficient strategy, with HPV/p16Ki67-10y being a more cost-effective alternative. However, the final modality choice for OS-implementation will need to consider several factors. First, the HPV/Pap-10y strategy, albeit the most efficient, is the less effective strategy in terms of cancer incidence and prevalence reduction, conflicting with the primary

1  
2  
3 aim of the Cancer Plan to further reduce the CC burden in France [5] and thus making the HPV/Pap-  
4 5y a more suitable, cost-saving modality. Second, current screening behaviours in France result in  
5 over-participation, with numerous women performing Pap-tests more often than is recommended.  
6 This phenomenon is likely to be related to the yearly recommended consultation with a  
7 gynaecologist. Our results showed that going from a 5-year frequency to a 3-year frequency implies a  
8 huge increase in screening cost (from -€133,000 to +€558,000 per 10,000 eligible women) for a very  
9 small increase in survival (from 15.89 to 15.93). Indeed, HPV-testing is sensitive, but it has a low  
10 specificity and cervical lesion evolution is slow, with most lesions regressing spontaneously. Women's  
11 over-participation will thus be a challenge in the case of HPV-based OS implementation. This should  
12 be addressed beforehand, or these apparent efficient strategies would be poorly efficient, leading to  
13 frequent false-positive results and related unnecessary and potentially harmful testing. Third, HPV-  
14 testing is not recommended in women under 35 years of age, which would require a complex double  
15 screening system. Finally, the current screening organization in France is based on the Pap-test,  
16 which implies a different infrastructure. Switching to HPV would require the negotiation of HPV-test  
17 tariffs, the development of a quality assurance protocol to ensure a sensitivity that is consistent with  
18 those found during clinical studies, as well as the development of the required infrastructure and  
19 equipment. Thus, although primary HPV-testing produces results with a better efficiency, many  
20 challenges will need to be addressed before its implementation. In the meantime, switching to a Pap-  
21 test based OS remains an acceptable alternative and could lead the way to HPV-testing deployment.  
22  
23  
24

25  
26 As for p16/KI67 double-staining, our results show that it would be an efficient confirmation test or  
27 primary test with negotiated tariffs. However, the sensitivity and specificity of the test were based on  
28 a single study with centralized reading. Additional studies in different French settings would be  
29 required to confirm that the results are reproducible before generalization.  
30

31 Lastly, we do not present our results relatively to a willingness-to-pay threshold. This choice results  
32 from the fact that no cost-effectiveness threshold is relevant in France, since the national agency in  
33 charge of health technology assessment, including pharmacoeconomic evaluation (HAS) does not  
34 wish cost-effectiveness results to be compared to a threshold. Indeed, cost-effectiveness analyses  
35 are not used as a resource allocation tool for health technologies in France. Furthermore, since  
36 implementation of CC OS was decided, we did not aim to assess whether and how OS was efficient,  
37 but to determine which screening modality was the most efficient, keeping in mind practical issues.  
38 We feel that this choice is further reinforced by our results that confirm the legislator's decision to  
39 implement OS. In summary, this modelling study enabled the INCa to provide robust information to  
40 support a public decision on both efficient intermediate modalities for implementation of the CC OS  
41 programme and also on optimal screening strategies in a longer term and to anticipate the  
42 integration of promising technological innovations.  
43  
44  
45  
46  
47  
48  
49  
50  
51  
52  
53  
54  
55  
56  
57  
58  
59  
60

## Funding

This work was entirely funded by the National Cancer Institute.

## Declaration of interests

The authors have no conflict of interest to declare concerning this study.

## Authorship Statement

All authors participated in the study. Barré S, Leleu H and Massetti M participated in model development, data analysis and drafting of the manuscript. Barré S and De Bels F made critical review of the manuscript and approved its final version.

## Data Sharing

No additional data available.

## Notes/Acknowledgments

The authors acknowledge the members of the Scientific Committee for study for their critical review of the methodological choices, discussion of the results and conclusions of this medico-economic evaluation study:

Pr Jean Jacques Baldauf (Centre hospitalier universitaire de Strasbourg), Dr Anne Sophie Banaszuk (Structure de gestion du Maine et Loire), Nathalie Beltzer (Santé Publique France), Dr Mohamed-Béchir Ben Hadj Yahia (Centre hospitalier régional universitaire de Lille), Julia Bonastre (Institut Gustave Roussy), Dr Véronique Dalstein (Centre hospitalier universitaire Reims), Dr Marie Flori (Université de Lyon 1), Julie Gaillot (Institut National du Cancer), Chrystelle Gastaldi-Ménager (Caisse nationale d'assurance maladie des travailleurs salariés), Ken Haguenoer (Centre hospitalier régional universitaire de Tours), Françoise Hamers (Santé Publique France), Guy Launoy (Centre hospitalier universitaire de Caen, Inserm), Patricia Lucidarme (Collège national des sages-femmes), Emmanuel Ricard (Ligue Nationale contre le cancer), Jean-Paul Romarin (Agence régionale de santé du Languedoc-Roussillon Midi-Pyrénées), Catherine Rumeau-Pichon (Haute Autorité de Santé), Emmanuelle Salines (Ministère de la Santé) Nadia Thomas (Structure de gestion de Guyane), Alain Trugeon (Observatoire régional de santé de Picardie), Hélène Vandewalle (Institut National du Cancer), Anne Sophie Woronoff (Registre des cancers du Doubs), Laura Zanetti (Haute Autorité de Santé)

## Figure Legends

Figure 1: Structure of the model for the natural history of cervical cancer

Figure 2: Results of OS strategies assessed on cancer reduction rate and associated mean cost

Figure 3: Tornado diagram of DSA and scenario analyses with the biggest impact on survival for HPV/Pap-10y versus current situation

Figure 4: Tornado diagram of DSA and scenario analyses with the biggest impact on costs for HPV/Pap-10y versus current situation

## REFERENCES

1. Haute Autorité de Santé. État des lieux et recommandations pour le dépistage du cancer du col de l'utérus en France. 2010. [http://www.has-sante.fr/portail/jcms/c\\_1009772/fr/etat-des-lieux-et-recommandations-pour-le-depistage-du-cancer-du-col-de-l-uterus-en-France](http://www.has-sante.fr/portail/jcms/c_1009772/fr/etat-des-lieux-et-recommandations-pour-le-depistage-du-cancer-du-col-de-l-uterus-en-France)
2. Monnereau A, Remontet L, Maynadié, *et al.* Estimation nationale de l'incidence des cancers en France entre 1980 et 2012. Etude à partir des registres des cancers du réseau Francim - Partie 1 : tumeurs solides. 2013. <http://invs.santepubliquefrance.fr/Publications-et-outils/Rapports-et-syntheses/Maladies-chroniques-et-traumatismes/2013/Estimation-nationale-de-l-incidence-des-cancers-en-France-entre-1980-et-2012>
3. Institut National du Cancer. Généralisation du dépistage du cancer du col de l'utérus /Étude médico-économique /Phase 1. 2015. <http://www.e-cancer.fr/Expertises-et-publications/Catalogue-des-publications/Synthese-Generalisation-du-depistage-du-cancer-du-col-de-l-uterus-etude-medico-economique-Phase-1>
4. Institut de Veille Sanitaire. Vaccination rate among women under 30. 2015. Personal Communication
5. Ministère des Affaires sociales et de la santé, Ministère de l'Enseignement supérieur et de la recherche. Plan Cancer 2014-2019, Guérir et prévenir les cancers : donnons les mêmes chances à tous, partout en France. 2014. <http://www.e-cancer.fr/Plan-cancer/Plan-cancer-2014-2019-priorites-et-objectifs>
6. Hamers FF, Duport N, Beltzer N. Population-based organized cervical cancer screening pilot program in France. *Eur J Cancer Prev.* 2017 Mar 30.
7. Haguenoer K, Sengchanh S, Gaudy-Graffin C, *et al.* Vaginal self-sampling is a cost-effective way to increase participation in a cervical cancer screening programme: a randomised trial. *British journal of cancer.* 2014;111(11):2187-96.
8. Dalstein V, Charlier B, Botokey J, *et al.* Évaluation intermédiaire de START -HPV, programme pilote de dépistage primaire par test HPV des lésions précancéreuses et cancéreuses du col utérin dans le département des Ardennes, France, 2012-2013. *Bull Epidémiol Hebd.* 2014(13-14-15):254-9.
9. Bergeron C, Ikenberg H, Sideri M, *et al.* Prospective evaluation of p16/Ki-67 dual-stained cytology for managing women with abnormal Papanicolaou cytology: PALMS study results. *Cancer Cytopathol.* 2015;123(6):373-81.
10. Demarteau N, Detournay B, Tehard B, *et al.* A generally applicable cost-effectiveness model for the evaluation of vaccines against cervical cancer. *International journal of public health.* 2011;56(2):153-62.
11. Binder-Foucard F, Belot A, Delafosse P, *et al.* Estimation nationale de l'incidence et de la mortalité par cancer en France entre 1980 et 2005. Etude à partir des registres des cancers du réseau Francim - Partie 1 : tumeurs solides. 2008 <http://invs.santepubliquefrance.fr/Publications-et-outils/Rapports-et-syntheses/Maladies-chroniques-et-traumatismes/2013/Estimation-nationale-de-l-incidence-et-de-la-mortalite-par-cancer-en-France-entre-1980-et-2012>
12. Dervaux B, Lenne X, Lévy-Bruhl D, *et al.* Modélisation médico-économique de l'impact de l'organisation du dépistage du cancer du col utérin et de l'introduction de la vaccination contre les HPV dans le calendrier vaccinal. 2008. [https://www.mesvaccins.net/textes/rapport\\_modelisation\\_hpv.pdf](https://www.mesvaccins.net/textes/rapport_modelisation_hpv.pdf)

- 1  
2  
3 13. Myers E R, McCrory D C, Nanda K, *et al*. Mathematical model for the natural history of human  
4 papillomavirus infection and cervical carcinogenesis. *American journal of epidemiology*.  
5 2000;151(12):1158-71.  
6
- 7 14. Wright J D, Chen L, Tergas A I, *et al*. Population-level trends in relative survival for cervical  
8 cancer. *Am J Obstet Gynecol*. 2015.  
9
- 10 15. Mustafa R A, Santesso N, Khatib R, *et al*. Systematic reviews and meta-analyses of the  
11 accuracy of HPV tests, visual inspection with acetic acid, cytology, and colposcopy. *Int J Gynaecol*  
12 *Obstet*. 2016;132(3):259-65.  
13
- 14 16. Ikenberg H, Bergeron C, Schmidt D, *et al*. Screening for cervical cancer precursors with  
15 p16/Ki-67 dual-stained cytology: results of the PALMS study. *Journal of the National Cancer Institute*.  
16 2013;105(20):1550-7.  
17
- 18 17. Mayrand M. H, Duarte-Franco E, Rodrigues I, *et al*. Human papillomavirus DNA versus  
19 Papanicolaou screening tests for cervical cancer. *N Engl J Med*. 2007;357(16):1579-88.  
20
- 21 18. Haute Autorité de Santé. Choix méthodologiques pour l'évaluation médico-économique à la  
22 HAS. 2011. [http://www.has-sante.fr/portail/upload/docs/application/pdf/2011-](http://www.has-sante.fr/portail/upload/docs/application/pdf/2011-11/guide_methodo_vf.pdf)  
23 [11/guide\\_methodo\\_vf.pdf](http://www.has-sante.fr/portail/upload/docs/application/pdf/2011-11/guide_methodo_vf.pdf)  
24
- 25 19. Riethmuller D, Gay C, Bertrand X, *et al*. Genital human papillomavirus infection among  
26 women recruited for routine cervical cancer screening or for colposcopy determined by Hybrid  
27 Capture II and polymerase chain reaction. *Diagn Mol Pathol*. 1999;8(3):157-64.  
28
- 29 20. Clavel C, Masure M, Bory J P, *et al*. Human papillomavirus testing in primary screening for the  
30 detection of high-grade cervical lesions: a study of 7932 women. *British journal of cancer*.  
31 2001;84(12):1616-23.  
32
- 33 21. Boulanger J C, Sevestre H, Bauville E, *et al*. [Epidemiology of HPV infection]. *Gynecol Obstet*  
34 *Fertil*. 2004;32(3):218-23.  
35
- 36 22. Beby-Defaux A, Bourgoïn A, Ragot S, *et al*. Human papillomavirus infection of the cervix uteri  
37 in women attending a Health Examination Center of the French social security. *Journal of medical*  
38 *virology*. 2004;73(2):262-8.  
39
- 40 23. Dalstein V, Riethmuller D, Sautiere J L, *et al*. Detection of cervical precancer and cancer in a  
41 hospital population; benefits of testing for human papillomavirus. *European journal of cancer*  
42 (Oxford, England : 1990). 2004;40(8):1225-32.  
43
- 44 24. Moscicki A B, Hills N, Shiboski S, *et al*. Risks for incident human papillomavirus infection and  
45 low-grade squamous intraepithelial lesion development in young females. *Jama*. 2001;285(23):2995-  
46 3002.  
47
- 48 25. Melnikow J, Nuovo J, Willan A R, *et al*. Natural history of cervical squamous intraepithelial  
49 lesions: a meta-analysis. *Obstetrics and gynecology*. 1998;92(4 Pt 2):727-35.  
50
- 51 26. Nobbenhuis M A, Helmerhorst T J, van den Brule A J, *et al*. Cytological regression and  
52 clearance of high-risk human papillomavirus in women with an abnormal cervical smear. *Lancet*.  
53 2001;358(9295):1782-3.  
54
- 55 27. Sanders G D, Taira A V. Cost-effectiveness of a potential vaccine for human papillomavirus.  
56 *Emerg Infect Dis*. 2003;9(1):37-48.  
57  
58  
59  
60

- 1  
2  
3 28. Van de Velde N, Brisson M, Boily M C Modeling human papillomavirus vaccine effectiveness:  
4 quantifying the impact of parameter uncertainty. *American journal of epidemiology*.  
5 2007;165(7):762-75.  
6  
7 29. Accetta G, Biggeri A, Carreras G, *et al*. Is human papillomavirus screening preferable to  
8 current policies in vaccinated and unvaccinated women? A cost-effectiveness analysis. *Journal of*  
9 *medical screening*. 2010;17(4):181-9.  
10  
11 30. Berkhof J, Coupe V M, Bogaards J A, *et al*. The health and economic effects of HPV DNA  
12 screening in The Netherlands. *International journal of cancer Journal international du cancer*.  
13 2010;127(9):2147-58.  
14  
15 31. Burger E A, Kim J J. The value of improving failures within a cervical cancer screening  
16 program: an example from Norway. *International journal of cancer Journal international du cancer*.  
17 2014;135(8):1931-9.  
18  
19  
20  
21  
22  
23  
24  
25  
26  
27  
28  
29  
30  
31  
32  
33  
34  
35  
36  
37  
38  
39  
40  
41  
42  
43  
44  
45  
46  
47  
48  
49  
50  
51  
52  
53  
54  
55  
56  
57  
58  
59  
60

1  
2  
3  
4  
5  
6  
7  
8  
9  
10  
11  
12  
13  
14  
15  
16  
17  
18  
19  
20  
21  
22  
23  
24  
25  
26  
27  
28  
29  
30  
31  
32  
33  
34  
35  
36  
37  
38  
39  
40  
41  
42  
43  
44  
45  
46  
47  
48  
49  
50  
51  
52  
53  
54  
55  
56  
57  
58  
59  
60



Structure of the model for the natural history of cervical cancer

86x36mm (300 x 300 DPI)

Peer review only



Results of OS strategies assessed on cancer reduction rate and associated mean cost

119x76mm (300 x 300 DPI)

Review only

1  
2  
3  
4  
5  
6  
7  
8  
9  
10  
11  
12  
13  
14  
15  
16  
17  
18  
19  
20  
21  
22  
23  
24  
25  
26  
27  
28  
29  
30  
31  
32  
33  
34  
35  
36  
37  
38  
39  
40  
41  
42  
43  
44  
45  
46  
47  
48  
49  
50  
51  
52  
53  
54  
55  
56  
57  
58  
59  
60



1  
2  
3  
4  
5  
6  
7  
8  
9  
10  
11  
12  
13  
14  
15  
16  
17  
18  
19  
20  
21  
22  
23  
24  
25  
26  
27  
28  
29  
30  
31  
32  
33  
34  
35  
36  
37  
38  
39  
40  
41  
42  
43  
44  
45  
46  
47  
48  
49  
50  
51  
52  
53  
54  
55  
56  
57  
58  
59  
60

Results of DSA and scenario analyses with the biggest impact on survival for organised screening by invitation and recall of non-participant eligible women to perform a HPV-test every 10 years (Pap-test confirmation) versus current situation



Tornado diagram of DSA and scenario analyses with the biggest impact on survival for HPV/Pap-10y versus current situation

102x67mm (300 x 300 DPI)

view only

1  
2  
3  
4  
5  
6  
7  
8  
9  
10  
11  
12  
13  
14  
15  
16  
17  
18  
19  
20  
21  
22  
23  
24  
25  
26  
27  
28  
29  
30  
31  
32  
33  
34  
35  
36  
37  
38  
39  
40  
41  
42  
43  
44  
45  
46  
47  
48  
49  
50  
51  
52  
53  
54  
55  
56  
57  
58  
59  
60

Results of DSA and scenario analyses with the biggest impact on costs for organised screening by invitation and recall of non-participant eligible women to perform a HPV-test every 10 years (Pap-test confirmation) versus current situation



Tornado diagram of DSA and scenario analyses with the biggest impact on costs for HPV/Pap-10y versus current situation

102x67mm (300 x 300 DPI)

View only

### Supplementary File 1 Screening algorithms

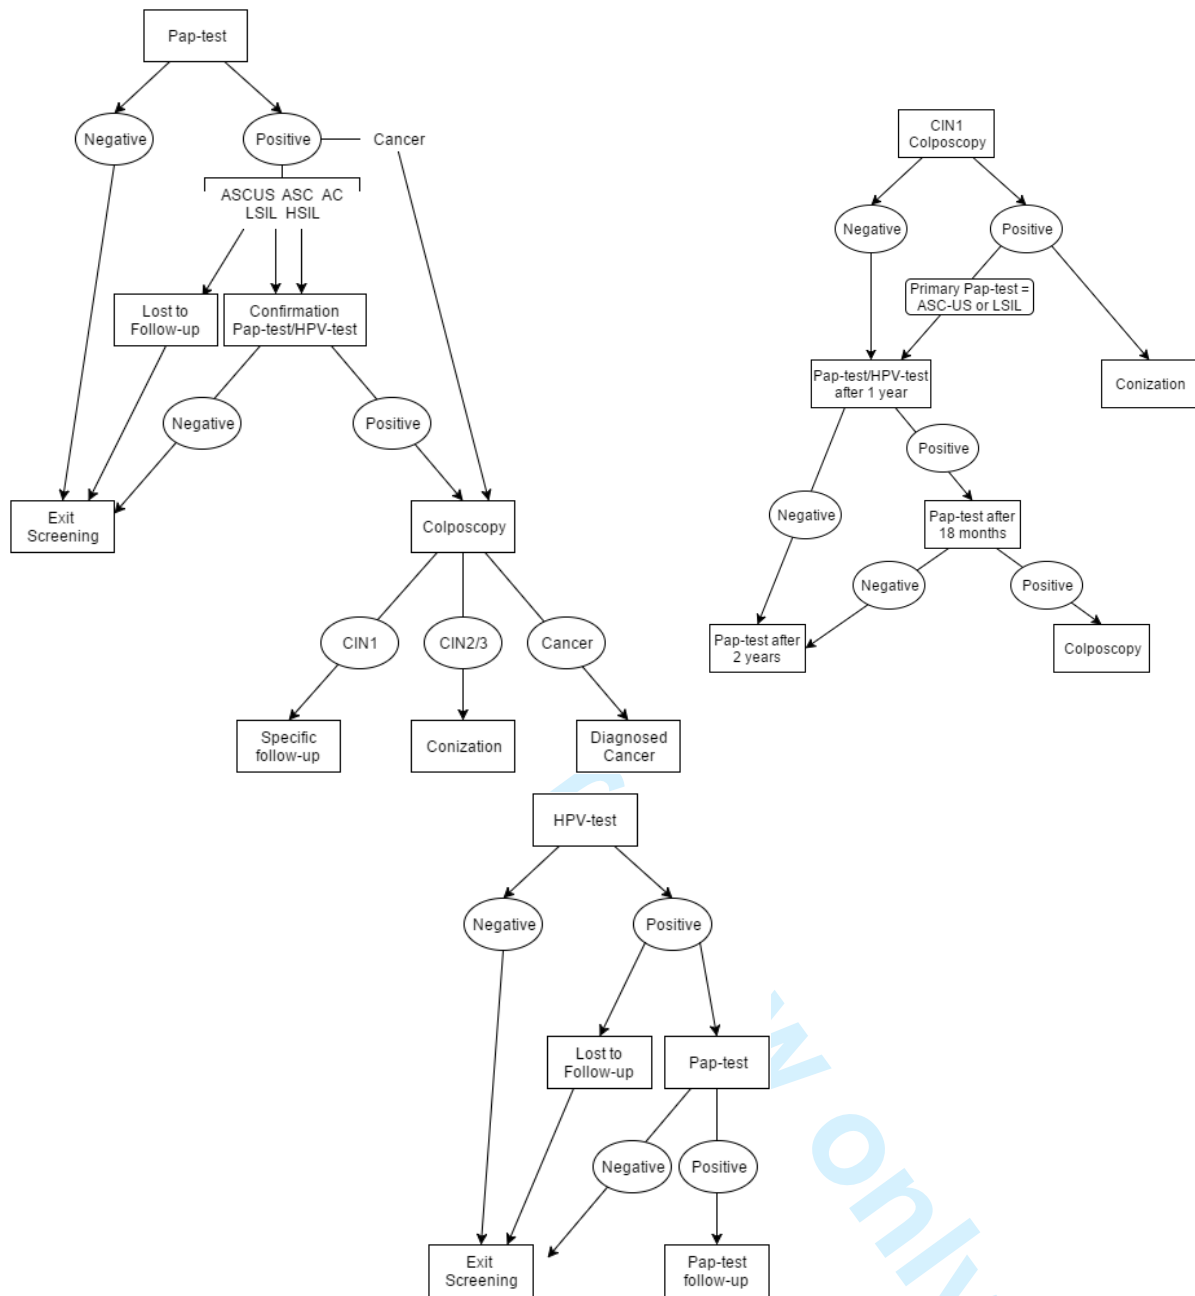

## Supplementary File 2 Pap-test results depending on HPV infection or lesion type

|                     | ASCUS  | ASC   | AC    | LSIL   | HSIL   | Cancer |
|---------------------|--------|-------|-------|--------|--------|--------|
| HPV-                | 53.5%  | 1.5%  | 2.7%  | 40.1%  | 2.3%   | 0.0%   |
| HPV+                | 53.5%  | 1.5%  | 2.7%  | 40.1%  | 2.3%   | 0.0%   |
| CIN1                | 53.5 % | 1.5 % | 2.7 % | 40.1 % | 2.3 %  | 0.0 %  |
| CIN2/3              | 26.2 % | 6.0 % | 9.6 % | 32.4 % | 23.2 % | 2.6 %  |
| Cancer (all stages) | 0.0%   | 0.0%  | 0.0%  | 0.0%   | 0.0%   | 100.0% |

## Follow-up of positive Pap-test, by Pap-test result

|        | Confirmation<br>Pap-test | Confirmation<br>HPV-test | Colposcopy | Conization | Lost to follow-up |
|--------|--------------------------|--------------------------|------------|------------|-------------------|
| ASCUS  | 36,9 %                   | 10,8 %                   | 23,9 %     | 1,3 %      | 27,1 %            |
| ASC    | 36,3 %                   | 0,0 %                    | 48,8 %     | 7,1 %      | 7,8 %             |
| AC     | 6,5 %                    | 0,0 %                    | 30,7 %     | 7,0 %      | 55,9 %            |
| LSIL   | 36,2 %                   | 0,0 %                    | 32,0 %     | 3,5 %      | 28,3 %            |
| HSIL   | 21,4 %                   | 0,0 %                    | 50,1 %     | 19,1 %     | 9,4 %             |
| Cancer | 10,0 %                   | 0,0 %                    | 85,0 %     | 5,0 %      | 0,0 %             |

## Supplementary File 3 Extended model presentation

Due to the complexity of screening algorithms and screening pace depending on the women's history and interactions that exist between screening and individual characteristics, a stochastic microsimulation model based on a Markov methodology and a 1-year cycle length was adapted based on a previously published Markov cohort-based model that has been updated.

Given the importance of individual characteristics, the analysis is based on the simulation of closed cohorts of women eligible for CC screening and representative in terms of age, HPV infection and precancerous and cancerous lesions in order to assess the actual cost-effectiveness of SO implementation in eligible women. Therefore, the results of the model specifically address the efficiency of the various OS strategies assessed and do not allow for epidemiological prediction.

According to the French national health authority (HAS), the model perspective is the collective perspective, meaning that costs borne by all payers are taken into consideration. Costs and survival results are discounted at a 4% annual rate.

The model is programmed in C++. Input data and scenario definition are entered through a Microsoft Excel interface. Model results are then exported to Excel to generate the figures and tables.

### Women generation

The model first generates women with the following characteristics: age (25-56), participant in IndScr, period between carrying out two voluntary IndScr, health state at model initiation and vaccination status. Due to the recent introduction of vaccination, only women aged under 30 can be vaccinated.

### Natural history of CC

Women then initiate the simulation of CC's natural history. At each cycle, non-HPV-infected women can become infected. This infection can spontaneously regress or progress and lead to grade 1 cervical intraepithelial neoplasia (CIN 1). CIN1 lesions can become pre-cancerous (grades 2 and 3 cervical intraepithelial neoplasia, CIN2/3). Once CIN 2/3 lesions have become persistent, they cannot regress spontaneously any longer and can only progress to cancerous lesions of first grade, based on the International Federation of Gynecology and Obstetrics (FIGO) classification. FIGO I CC can progress to grades 2, 3 and 4 and/or become symptomatic, leading to diagnosis of the CC and treatment initiation. Cancer mortality based on cancer severity grade and time since diagnosis is applied to women with symptomatic/diagnosed cancer. Women can die of age-specific general mortality at any state. See figure 1 for the structure of the model.

Considering the age distribution of the cohort and its low adoption in France (17% of women under 30), the effect of vaccination is simulated by applying a relative risk of infection by oncogenic HPV to vaccinated women (i.e. herd immunity is not considered).

### Screening

Each year, the model determines whether the simulated woman performs IndScr based on her status (participant in IndScr or not) and her specific IndScr frequency, both parameters generated at the initiation and updated throughout the simulation. If the woman has not performed a CC screening or received an OS invitation/recall for a period that exceeds the OS periodicity, she receives an invitation to participate. Women that are still NP receive a recall during the same cycle.

Invitation and recall modalities determine different participation probabilities upon receiving. During the screening cycle, IndScr and OS participants perform the screening test determined by the OS

strategy assessed. Test characteristics (sensitivity/specificity) and the screening algorithm determine the result of the primary screening test based on the actual health state of the woman as well as the follow-up actions in case of positive results. Follow-up includes confirmation tests, colposcopy and conizations. Some women become lost to follow-up. Women diagnosed with CC switch to the corresponding diagnosed state.

### Women’s characteristics

The modelled population corresponds to all women aged 25 to 65, that is, all women eligible for IndScr according to current recommendations. Age distribution within the population is based on the national statistics office (INSEE) data.

Twelve percent (12.2%) of the eligible women were found to benefit from the universal complementary health insurance (CMU-c) in an analysis of a representative sample of the French SHI general regimen (employees). Vaccination rate among women aged 25 was based on the last available data which found a 17% uptake among young women since the vaccine became available. Distribution of each modelled health state by age within the population was based on the results of the simulation of a cohort of 14-year-old women. Health-state distribution in the generated cohort at each age is presented in the figure below.

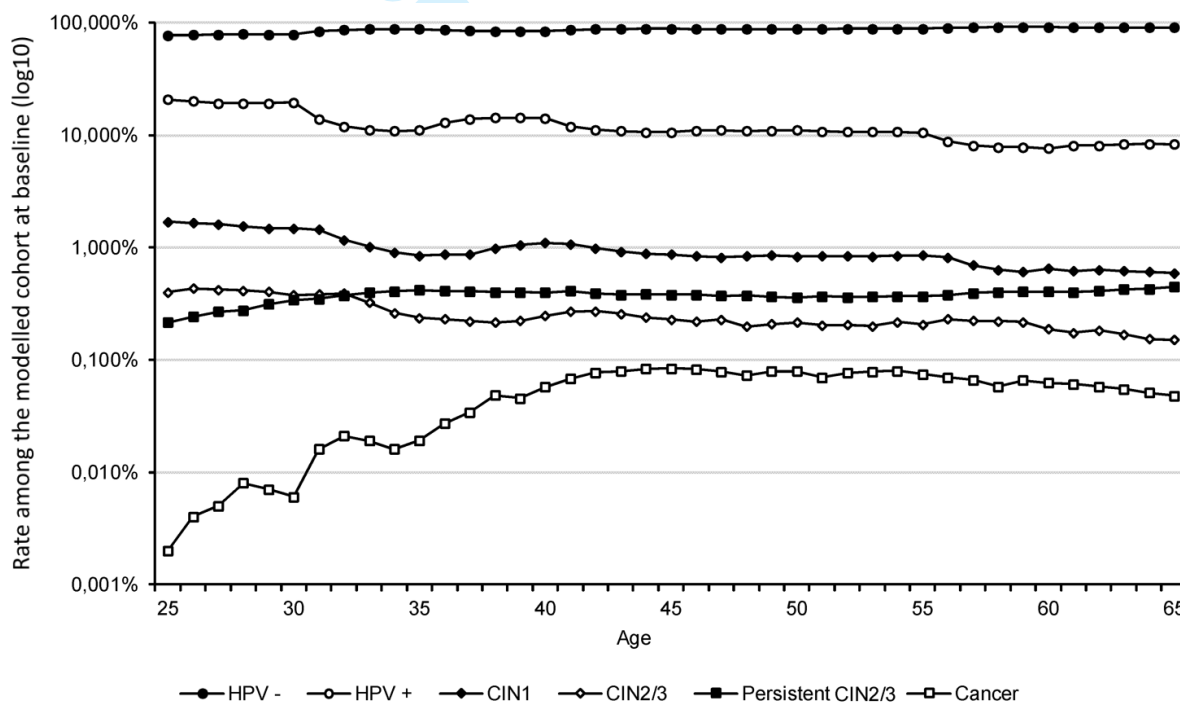

In scenarios based on Pap-test and p16/Ki67, IndScr participation is determined based on the analysis of a sample of the SHI general regimen: at 4 years, 61.9 % of eligible women were found to be participants. At patient generation, a relative risk (RR) of participation is applied to account for the impact of age and universal complementary health insurance (CMU-c). Another analysis of the same dataset provided the observed period between two IndScr (annual to every 10 years, see Supplementary file 3).

Each woman is associated with a SI participation status (Yes/No) and a screening period. Age-dependent probabilities of becoming NP are applied throughout the simulation to account for the lesser participation among older women. These probabilities are determined as follows:

$$P_{become\ non-participant} = (RR_{next\ age-group} / RR_{current\ age-group}) / 5$$

### Transition probabilities

High risk (HR) HPV annual infection rate was estimated to vary from 3.5% and 14% depending on age, in order to fit with the observed HR-HPV prevalence, considering a 50% annual viral clearance rate, according to the model developed by Demarteau *et al.* In younger women, vaccination is modelled through the application of a relative risk of infection taking into account the vaccination rate and decreased infection risk among vaccinated women.



Annual transition probabilities that determine the odds of progression from HPV infection to persistent CIN2/3 precancerous lesion are replicated from the model developed by Demarteau *et al.* and presented in table 2.

Considering the lack of appropriate data, the age-specific progression transition probability of persistent CIN2/3 to FIGO I CC was estimated by calibrating the model to the CC incidence data available. The calibration process consisted in the simulation of a cohort of 14-year-old women, taking the observed IndScr participation rate into account. Transition probabilities were adjusted within a plausible interval in order to duplicate the observed incidence of CC by age. The following figures respectively present the results of the calibration process and the resulting persistent CIN 2/3 to FIGO I CC transition probabilities by age.





Probabilities of cancer progression and symptom emergence were obtained from the natural history of CC simulation model developed by Myers *et al.*

Cancer mortality by cancer grade and time since diagnosis were obtained from the study by Wright *et al.* based on the estimation of survival among 46,932 women with CC diagnosed from 1983-2009 and recorded in the Surveillance, Epidemiology, and End Results (SEER) database. Survival data for white women under 50 were selected, as mortality by causes other than CC seems unlikely in women under 50. General mortality is modelled according to French national statistics office (INSEE) data.

### Screening

OS participation rates after receiving an invitation or recall are based on the results of local OS experimentations carried out in different regions. The weighted averages of the participation rate upon receiving a mailed invitation or recall letter by the number of Pap-tests performed during each experimentation were respectively found to be 17.3% and 12.1%. Screening test sensitivity and specificity are given in the following table.

| Screening test                   | Sensitivity              | Specificity              | Source          |
|----------------------------------|--------------------------|--------------------------|-----------------|
| Primary Pap-test                 | 70.0 % (57.0 % - 80.0 %) | 95.0 % (92.0 % - 97.0 %) | Mustafa (2015)  |
| Confirmation Pap-test after HPV+ | 85.9 % (76.6 % - 92.1 %) | 65.9 % (63.1 % - 68.6 %) | Bergeron (2015) |
| Primary HPV-test                 | 94.0 % (89.0 % - 97.0 %) | 90.0 % (86.0 % - 93.0 %) | Mustafa (2015)  |
| Confirmation HPV-test after Pap+ | 100.0 % (NR)             | 61.1 % (NR)              | Mayrand (2007)  |
| P16/Ki67                         | 86.7 % (81.1 % - 90.9 %) | 95.2 % (94.9 % - 95.4 %) | Ikenberg (2013) |
| Colposcopy                       | 100.0% (NA)              | 100.0% (NA)              | Assumption      |

At each screening cycle, test performances determine whether women with lesions are screened positive or not depending on their current health state.

Pap-test and p16/Ki67 specificity and specificity are relative to the detection of CIN2/3 and more severe lesions. Women with negative results exit screening, positive results lead to the random draw of an observed lesion type based on the results of the OS experimentation led in the Alsace region (Supplementary file 4).



The action that follows each type of result is then randomly drawn according to the screening algorithms and the results of the OS experimentation led in Alsace. Based on the probabilities reported in Supplementary file 5, the different types of results can lead to further confirmation tests or conisation. Some women become lost to follow-up and exit screening.

|               | Confirmation<br>Pap-test | Confirmation<br>HPV-test | Colposcopy | Conization | Lost to follow-up |
|---------------|--------------------------|--------------------------|------------|------------|-------------------|
| <b>ASCUS</b>  | 36,9 %                   | 10,8 %                   | 23,9 %     | 1,3 %      | 27,1 %            |
| <b>ASC</b>    | 36,3 %                   | 0,0 %                    | 48,8 %     | 7,1 %      | 7,8 %             |
| <b>AC</b>     | 6,5 %                    | 0,0 %                    | 30,7 %     | 7,0 %      | 55,9 %            |
| <b>LSIL</b>   | 36,2 %                   | 0,0 %                    | 32,0 %     | 3,5 %      | 28,3 %            |
| <b>HSIL</b>   | 21,4 %                   | 0,0 %                    | 50,1 %     | 19,1 %     | 9,4 %             |
| <b>Cancer</b> | 10,0 %                   | 0,0 %                    | 85,0 %     | 5,0 %      | 0,0 %             |

In order to take the impact of the screening organization structures into account, OS implementation leads to reduced odds of becoming lost to follow-up after a positive result for both OS and IndScr participants. Based on the Alsace and Indre-et-Loire regional OS experimentation results, a 0.77 RR of becoming lost to follow-up is applied.

Colposcopy is associated with 100% sensitivity and specificity. Therefore, colposcopy results are negative in HPV- and HPV+ women and positive in women with CIN1, CIN2/3 and persistent CIN2/3 lesions. Women with CIN1 proceed to a particular screening algorithm based on recommendations by the French national scientific society of obstetricians and gynaecologists (CNGOF).

HPV-tests and specificity are relative to the detection of HPV+ and more severe lesions. Women with negative results exit screening, positive results lead to a confirmation Pap-test (or p16/Ki67) followed by a colposcopy in case of a new positive result. If negative, a new round of HPV and Pap-tests are performed concomitantly after one year: a positive result for either of them (or both) leads to colposcopy; women with negative-only results exit screening.

Rates of lost to follow-up observed during the START-HPV experimentation (Ardennes region) were used. The lost to follow-up rate after positive confirmation Pap-tests was estimated by subtracting the latter from the average rate of lost to follow-up in HPV+ women observed in the Alsace region OS experimentation (27.7%). Similarly to Pap-based screening, a 0.77 RR of being lost to follow-up is applied in OS-participant women.

| Lost to follow-up after               | Probability | Source                                         |
|---------------------------------------|-------------|------------------------------------------------|
| <b>Positive HPV-test</b>              | 19,4 %      | START-HPV, Ardennes                            |
| <b>Positive confirmation pap-test</b> | 8,3 %       | START-HPV, Ardennes, Alsace OS experimentation |

All samples have odds of being unreadable, depending on the nature of the sample. Women with unreadable samples perform a new test.

A 95% efficacy was considered for conisation. Women with successful conisation go back to the HPV-state. In case of failure, women leave screening in their current state.

## Supplementary File 4 Individual screening participation and periodicity data

| Individual screening frequency | Distribution |
|--------------------------------|--------------|
| Annual                         | 5,9%         |
| 2 years                        | 21,5%        |
| 3 years                        | 18,7%        |
| 4 years                        | 8,6%         |
| 5 years                        | 4,3%         |
| 6 years                        | 2,8%         |
| 7 years                        | 1,8%         |
| 8 years                        | 1,1%         |
| 9 years                        | 0,7%         |
| 10 years                       | 0,5%         |



| Population                                                   | RR of participating vs. average | Source                                          |
|--------------------------------------------------------------|---------------------------------|-------------------------------------------------|
| <b>Age</b>                                                   |                                 |                                                 |
| 25 – 30                                                      | 1,06                            | National health insurance database <sup>3</sup> |
| 30 – 35                                                      | 1,08                            | National health insurance database <sup>3</sup> |
| 35 – 40                                                      | 1,07                            | National health insurance database <sup>3</sup> |
| 40 – 45                                                      | 1,04                            | National health insurance database <sup>3</sup> |
| 50 – 55                                                      | 0,92                            | National health insurance database <sup>3</sup> |
| 55 – 60                                                      | 0,82                            | National health insurance database <sup>3</sup> |
| 60 – 65                                                      | 0,77                            | National health insurance database <sup>3</sup> |
| <b>Universal complementary health insurance registration</b> |                                 |                                                 |
| Yes                                                          | 0,80                            | National health insurance database <sup>3</sup> |
| No                                                           | 1,03                            | National health insurance database <sup>3</sup> |

Each woman is associated with an IndScr participation status (Yes/No) and a screening period. Age-dependent probabilities of becoming NP are applied throughout the simulation to account for the lesser participation among older women. These probabilities are determined as follows:

$$P_{become\ non-participant} = (RR_{next\ age-group} / RR_{current\ age-group}) / 5$$

### Supplementary File 5 Model validation results

The model faithfully reproduces cancer incidence, however the modelled CC mortality was slightly higher than observed data, although differences were systematically inferior to 4 per 100,000.



only

## Supplementary File 6 Cost-utility analysis - specific inputs and results

| State                                  | Utility/Utility decrement | Source         |
|----------------------------------------|---------------------------|----------------|
| Age 18-29                              | 0.86                      | Perneger, 2010 |
| Age 30-39                              | 0.86                      |                |
| Age 40-49                              | 0.84                      |                |
| Age 50-59                              | 0.81                      |                |
| Age 60-69                              | 0.8                       |                |
| Age 70-79                              | 0.76                      |                |
| Age 80+                                | 0.74                      |                |
| Diagnosed CIN1                         | -0.01                     |                |
| Diagnosed CIN2/3                       | -0.01                     |                |
| Cervical Cancer (1 <sup>st</sup> year) | -0.27                     | Korfage, 2009  |
| Cervical Cancer (thereafter)           | -0.06                     |                |

| Scénario        | QALY   | Total cost (K€) | ICER (€/LY) vs current | Frontier       |
|-----------------|--------|-----------------|------------------------|----------------|
| IndScr only*    | 16.4   | 122.6           | Reference              | Dominated      |
| Pap/Pap-HPV     | +9.54  | +22.3           | 23,392                 | Dominated      |
| Pap/p16Ki67     | +11.18 | +25.5           | 22,891                 | Dominated      |
| HPV/Pap-3y      | +14.99 | +55.8           | 37,290                 | Dominated      |
| HPV/Pap-5y      | +14.76 | -13.3           | Dominant               | Ext. Dominated |
| HPV/Pap-10y     | +9.44  | -73.4           | Dominant               | Reference      |
| HPV/p16Ki67-5y  | +17.06 | +3.79           | 2,222                  | 131,965        |
| HPV/p16Ki67-10y | +11.88 | -64.6           | Dominant               | 36,468         |
| p16Ki67/p16Ki67 | +17.53 | +160.7          | 91,703                 | 3,302,932      |

\*Reference for other scenarios. Extra-QALY per 10,000 women eligible for OS on a lifetime horizon. QALY: Quality Adjusted Life Years

## Table

Table 1 | CHEERS checklist—Items to include when reporting economic evaluations of health interventions

| Section/item                                           | Item No | Recommendation                                                                                                                                                                                                                                                                                                                                        | Reported on page No/line No |
|--------------------------------------------------------|---------|-------------------------------------------------------------------------------------------------------------------------------------------------------------------------------------------------------------------------------------------------------------------------------------------------------------------------------------------------------|-----------------------------|
| <b>Title and abstract</b>                              |         |                                                                                                                                                                                                                                                                                                                                                       |                             |
| Title                                                  | 1       | Identify the study as an economic evaluation or use more specific terms such as "cost-effectiveness analysis", and describe the interventions compared.                                                                                                                                                                                               | 1                           |
| Abstract                                               | 2       | Provide a structured summary of objectives, perspective, setting, methods (including study design and inputs), results (including base case and uncertainty analyses), and conclusions.                                                                                                                                                               | 2                           |
| <b>Introduction</b>                                    |         |                                                                                                                                                                                                                                                                                                                                                       |                             |
| Background and objectives                              | 3       | Provide an explicit statement of the broader context for the study.                                                                                                                                                                                                                                                                                   | 3                           |
|                                                        |         | Present the study question and its relevance for health policy or practice decisions.                                                                                                                                                                                                                                                                 | 3/28 - 29                   |
| <b>Methods</b>                                         |         |                                                                                                                                                                                                                                                                                                                                                       |                             |
| Target population and subgroups                        | 4       | Describe characteristics of the base case population and subgroups analysed, including why they were chosen.                                                                                                                                                                                                                                          | Table 2, 6/12 - 18          |
| Setting and location                                   | 5       | State relevant aspects of the system(s) in which the decision(s) need(s) to be made.                                                                                                                                                                                                                                                                  | 4                           |
| Study perspective                                      | 6       | Describe the perspective of the study and relate this to the costs being evaluated.                                                                                                                                                                                                                                                                   | 6/36 - 37                   |
| Comparators                                            | 7       | Describe the interventions or strategies being compared and state why they were chosen.                                                                                                                                                                                                                                                               | Table 1, 4/2 - 20           |
| Time horizon                                           | 8       | State the time horizon(s) over which costs and consequences are being evaluated and say why appropriate.                                                                                                                                                                                                                                              | 5/27 - 28                   |
| Discount rate                                          | 9       | Report the choice of discount rate(s) used for costs and outcomes and say why appropriate.                                                                                                                                                                                                                                                            | 9/6 - 7                     |
| Choice of health outcomes                              | 10      | Describe what outcomes were used as the measure(s) of benefit in the evaluation and their relevance for the type of analysis performed.                                                                                                                                                                                                               | 9/6 - 7                     |
| Measurement of effectiveness                           | 11a     | <i>Single study-based estimates:</i> Describe fully the design features of the single effectiveness study and why the single study was a sufficient source of clinical effectiveness data.                                                                                                                                                            |                             |
|                                                        | 11b     | <i>Synthesis-based estimates:</i> Describe fully the methods used for identification of included studies and synthesis of clinical effectiveness data.                                                                                                                                                                                                | NA                          |
| Measurement and valuation of preference based outcomes | 12      | If applicable, describe the population and methods used to elicit preferences for outcomes.                                                                                                                                                                                                                                                           | NA                          |
| Estimating resources and costs                         | 13a     | <i>Single study-based economic evaluation:</i> Describe approaches used to estimate resource use associated with the alternative interventions. Describe primary or secondary research methods for valuing each resource item in terms of its unit cost. Describe any adjustments made to approximate to opportunity costs.                           |                             |
|                                                        | 13b     | <i>Model-based economic evaluation:</i> Describe approaches and data sources used to estimate resource use associated with model health states. Describe primary or secondary research methods for valuing each resource item in terms of its unit cost. Describe any adjustments made to approximate to opportunity costs.                           | 6/36 - 7/3                  |
| Currency, price date, and conversion                   | 14      | Report the dates of the estimated resource quantities and unit costs. Describe methods for adjusting estimated unit costs to the year of reported costs if necessary. Describe methods for converting costs into a common currency base and the exchange rate.                                                                                        | 7/2 - 3                     |
| Choice of model                                        | 15      | Describe and give reasons for the specific type of decision-analytical model used. Providing a figure to show model structure is strongly recommended.                                                                                                                                                                                                | Figure 1, 5/23 - 26         |
| Assumptions                                            | 16      | Describe all structural or other assumptions underpinning the decision-analytical model.                                                                                                                                                                                                                                                              | Table 2, 5/29 - 7/3         |
| Analytical methods                                     | 17      | Describe all analytical methods supporting the evaluation. This could include methods for dealing with skewed, missing, or censored data; extrapolation methods; methods for pooling data; approaches to validate or make adjustments (such as half cycle corrections) to a model; and methods for handling population heterogeneity and uncertainty. | 8/6 - 12                    |
| <b>Results</b>                                         |         |                                                                                                                                                                                                                                                                                                                                                       |                             |
| Study parameters                                       | 18      | Report the values, ranges, references, and, if used, probability distributions for all parameters. Report reasons or sources for distributions used to represent uncertainty where appropriate. Providing a table to show the input values is strongly recommended.                                                                                   | Table 2, 6/11 - 7/3         |
| Incremental costs and outcomes                         | 19      | For each intervention, report mean values for the main categories of estimated costs and outcomes of interest, as well as mean differences between the comparator groups. If applicable, report incremental cost-effectiveness ratios.                                                                                                                | Tables 3 & 4                |
| Characterising uncertainty                             | 20a     | <i>Single study-based economic evaluation:</i> Describe the effects of sampling uncertainty for the estimated incremental cost and incremental effectiveness parameters, together with the impact of methodological assumptions (such as discount rate, study perspective).                                                                           |                             |

RESEARCH METHODS & REPORTING

(continued)

| Section/item                                                                                                     | Item No | Recommendation                                                                                                                                                                                                                                                             | Reported on page No/line No |
|------------------------------------------------------------------------------------------------------------------|---------|----------------------------------------------------------------------------------------------------------------------------------------------------------------------------------------------------------------------------------------------------------------------------|-----------------------------|
|                                                                                                                  | 20b     | <i>Model-based economic evaluation:</i> Describe the effects on the results of uncertainty for all input parameters, and uncertainty related to the structure of the model and assumptions.                                                                                | Figures 3 & 4               |
| Characterising heterogeneity                                                                                     | 21      | If applicable, report differences in costs, outcomes, or cost-effectiveness that can be explained by variations between subgroups of patients with different baseline characteristics or other observed variability in effects that are not reducible by more information. | Figures 3 & 4; 11/24 - 35   |
| <b>Discussion</b>                                                                                                |         |                                                                                                                                                                                                                                                                            |                             |
| Study findings, limitations, generalisability, and current knowledge                                             | 22      | Summarise key study findings and describe how they support the conclusions reached. Discuss limitations and the generalisability of the findings and how the findings fit with current knowledge.                                                                          | 12 & 13                     |
| <b>Other</b>                                                                                                     |         |                                                                                                                                                                                                                                                                            |                             |
| Source of funding                                                                                                | 23      | Describe how the study was funded and the role of the funder in the identification, design, conduct, and reporting of the analysis. Describe other non-monetary sources of support.                                                                                        | 1                           |
| Conflicts of interest                                                                                            | 24      | Describe any potential for conflict of interest of study contributors in accordance with journal policy. In the absence of a journal policy, we recommend authors comply with International Committee of Medical Journal Editors recommendations.                          | None                        |
| For consistency, the CHEERS statement checklist format is based on the format of the CONSORT statement checklist |         |                                                                                                                                                                                                                                                                            |                             |

For peer review only

1  
2  
3  
4  
5  
6  
7  
8  
9  
10  
11  
12  
13  
14  
15  
16  
17  
18  
19  
20  
21  
22  
23  
24  
25  
26  
27  
28  
29  
30  
31  
32  
33  
34  
35  
36  
37  
38  
39  
40  
41  
42  
43  
44  
45  
46  
47  
48  
49  
50  
51  
52  
53  
54  
55  
56  
57  
58  
59  
60

# BMJ Open

## Organized screening for cervical cancer in France: a cost-effectiveness assessment

|                                 |                                                                                                                                                                                                           |
|---------------------------------|-----------------------------------------------------------------------------------------------------------------------------------------------------------------------------------------------------------|
| Journal:                        | <i>BMJ Open</i>                                                                                                                                                                                           |
| Manuscript ID                   | bmjopen-2016-014626.R4                                                                                                                                                                                    |
| Article Type:                   | Research                                                                                                                                                                                                  |
| Date Submitted by the Author:   | 16-Aug-2017                                                                                                                                                                                               |
| Complete List of Authors:       | Barré, Stéphanie; Institut National du Cancer, Dépistage<br>Masseti, Marc; Public Health Expertise,<br>Leleu, Henri; Public Health Expertise<br>De Bels, Frédéric; Institut National du Cancer, Dépistage |
| <b>Primary Subject Heading</b>: | Health economics                                                                                                                                                                                          |
| Secondary Subject Heading:      | Oncology, Public health, Diagnostics                                                                                                                                                                      |
| Keywords:                       | Health economics < HEALTH SERVICES ADMINISTRATION & MANAGEMENT, Gynaecological oncology < GYNAECOLOGY, PUBLIC HEALTH                                                                                      |
|                                 |                                                                                                                                                                                                           |

SCHOLARONE™  
Manuscripts

Peer review only

## Organized screening for cervical cancer in France: a cost-effectiveness assessment

### Authors:

Barré Stéphanie<sup>1</sup>, Massetti M<sup>2</sup>, Leleu H<sup>2</sup>, De Bels F<sup>1</sup>

1. French National Cancer Institute (INCa), 52 avenue André Morizet, Boulogne Billancourt Cedex, 92513, France.

2. Public Health Expertise, 157 rue du faubourg Saint Antoine, Paris, 75011, France.

### Corresponding author:

Barré Stéphanie, [sbarre@institutcancer.fr](mailto:sbarre@institutcancer.fr), +33 (0) 1 41 10 14 10

**Word count: 3680**

### French National Cancer Institute

The French National Cancer Institute was established under the Public Health Act of 9 August 2004 as the government health and science agency specialised in cancer control. It is a Public Interest Grouping which brings together State representatives, charities, health insurance funds, hospital federations and research organisations. It is responsible for rolling out the 2014-2019 Cancer Control Plan and reports to the Ministries for Health and for Research.

The Institute provides an integrated approach encompassing all cancer-control dimensions (health, scientific, social and economic) and areas of intervention (prevention, screening, care and research), for the benefit of patients and their relatives.

[www.e-cancer.fr](http://www.e-cancer.fr)



## ABSTRACT

**OBJECTIVE:** According to the third cancer plan, organized screening (OS) of cervical cancer (CC) among women aged 25-65 years should be implemented in France in the forthcoming years. The most efficient way to implement OS in the French health care system is yet to be determined.

**METHODS:** A microsimulation model was developed adopting a collective “all payers” perspective. A closed cohort of women eligible for CC screening and representative in terms of age and participation in individual screening (IndScr) by annual Papanicolaou (Pap) testing every 3 years was modelled on a lifetime horizon. Different OS strategies, additive to IndScr with a 61.9% participation rate based on mailed invitations to non-participant women to perform OS were assessed. Similar modalities were applied to OS and IndScr participants. Strategies implied different screening tests (Pap-test, HPV-test, and p16/Ki67 double-staining) and OS periodicity.

**RESULTS:** Compared to IndScr only, all OS strategies were associated with decreased cancer incidence/mortality (from 14.2%/13.5% to 22.9%/25.8%). Most strategies generated extra costs ranging from €37.9 to €1,607 per eligible woman. HPV testing every 10 and 5 years were cost-saving.

HPV tests every 10 and 5 years were the most efficient strategies, generating more survival at lower costs than Pap-based strategies. Compared to IndScr only, an HPV test every 10 years was cost-saving. The most effective strategies were p16/Ki67 as primary or HPV positive confirmation tests, with respective ICERs of €6,541,250 and €101,391 per life year. Pap-based strategies generated intermediary results.

**CONCLUSION:** OS strategies based on the HPV test appear highly efficient. However, our results rely on the assumption that women and practitioners comply with the recommended OS periodicities (3, 5, 10 years). Implementing these OS modalities will require major adaptations to the current CC screening organization. Pap-test based strategies might be simpler to set-up while preparing an appropriate implementation of more efficient OS screening modalities.

### STRENGTHS AND LIMITATIONS OF THE STUDY

- A microsimulation model was developed to assess the efficiency of possible cervical cancer organized screening strategies in France.
- The model operates on individual women who are eligible for screening and representative of the current French population on a lifetime horizon.
- Real-life practices and data were used, allowing for the fine modelling of the screening and validation against observed data.
- The lack of precision of transition probabilities in the context of a low incidence of cervical cancer, as well as the assumptions required to model screening practices after primary HPV tests, are the main limitations of the study.

For peer review only

## BACKGROUND

The natural history of cervical cancer (CC) is related to a persistent HPV infection of the cervix leading to squamous intraepithelial lesions that can evolve into cancerous lesions. CC prevention is based on screening to detect and remove lesions at the early stages to prevent invasive cancer and an anti-HPV vaccination to reduce cancer-associated HPV infection.[1]

In France, CC prevention is based on individual voluntary screening (IndScr) for CC of women aged 25 to 65 years and vaccination. IndScr is based on a Papanicolaou test (Pap test) every 3 years, after two annual Pap tests that are negative. Approximately 90% of Pap smears are done by gynaecologists, although general practitioners (GP) and midwives are also authorized to perform it. IndScr has led to a significant decrease in the incidence and associated mortality of CC in the past 20 years. In 2012, CC was the 11<sup>th</sup> most frequent and 12<sup>th</sup> most lethal form of cancer in women.[2] However, many women still do not participate in CC screening. Participation in IndScr was found to be approximately 61% of eligible women, with low access to healthcare, comorbidities and poverty being risk factors for non-participation.

Screening remains the main prevention tool in France, as anti-HPV vaccination is restricted to younger age groups and was only recently made available. Furthermore, vaccination has had a slow adoption in the French population. In 2015, it was estimated that only 17% of women eligible for vaccination were vaccinated.[3;4] In 2014, the third French Cancer Plan has been presented to address both the human and the societal challenges of cancer. CC organized screening (OS) implementation among women aged 25-65 years is part of its first operational objective and aims at a participation rate of 80% and a 30% reduction in CC-related mortality by 2019.[5]

Several OS experimentations have been performed in France to assess the efficacy of different screening modalities, including invitation and positive tests follow-up (FU), self-sampling and HPV-testing. Experimentations that consisted of an invitation of non-participants to perform a Pap test allowed to catch up with 13.2% of all eligible women after 3 years and reduced the lost to follow-up (LtFU) rates of women after a positive result.[6] Additionally, primary HPV-testing and self-sampling were shown to be a feasible alternative to the Pap smear in France.[7;8] Finally, innovative testing, such as p16/Ki67 double-staining, was shown to be a performant alternative for CC screening compared to HPV screening or the Pap test.[9]

Consequently, many alternative strategies can be considered for the implementation of OS for CC in France. Thus, a medico-economic evaluation of several OS strategies based on a cost-effectiveness analysis was performed by the French national cancer institute (INCa), which relied on a scientific steering committee that involved clinical experts and stakeholder representatives (social security, ministry of health, patients and professionals) providing advice on the methodological choices and best OS implementation modality in the French context.

In order to assist decision-making regarding the implementation of CC OS, our study's main outcomes correspond to the objectives of CC OS implementation: participation rate, survival and avoided CC. A cost-utility analysis was performed as well.

## METHODS

Seven strategies were compared to the current IndScr-only situation (table 1). These strategies were all based on adding to the current IndScr with the dispatch of screening invitations (followed by a single recall) to women who did not spontaneously participate in the last 3 years (non-participants). Hence, women who did not participate in regular screening are the only ones targeted by the interventions. OS strategies also included improved FU, resulting in a reduction in LtFU women.

Different screening tests were considered for primary screening or confirmation after a positive primary test, including Pap test, HPV DNA detection and p16/Ki67 double-staining. The women who tested positive for both primary and confirmation tests went through colposcopy and conization if a high-grade (grade 2 or worse [CIN2+]) cervical intraepithelial neoplasia (CIN) lesion was identified. Women with CIN1 were retested at 12, 18 and 24 months if the initial lesion was atypical squamous cells of undetermined significance (ASC-US) or low-grade squamous intraepithelial lesion (LSIL) on Pap, or went through colposcopy. The women who tested positive for a primary test and negative for confirmation were retested after one year. A fraction of the participants was LtFU. Women could only be invited once per cycle. Detailed screening algorithms are available in supplementary file 1.

The population was limited to women aged 25-65 years who are currently eligible for IndScr.

Table 1 Strategies compared

| Strategy         | IR + Improved Follow-up | Primary test       | Confirmation test after positive primary test |
|------------------|-------------------------|--------------------|-----------------------------------------------|
| Current          | No                      | Pap-test / 3 years | Pap-test or HPV                               |
| Pap/Pap          | Yes                     | Pap-test / 3 years | Pap-test                                      |
| Pap/p16Ki67      | Yes                     | Pap-test / 3 years | p16/Ki67                                      |
| HPV/Pap-5y†      | Yes                     | HPV / 5 years      | Pap-test                                      |
| HPV/Pap-3y†      | Yes                     | HPV / 3 years      | Pap-test                                      |
| HPV/Pap-10y†     | Yes                     | HPV / 10 years     | Pap-test                                      |
| HPV/p16Ki67-5y†  | Yes                     | HPV / 5 years      | p16/Ki67                                      |
| HPV/p16Ki67-10y† | Yes                     | HPV / 10 years     | p16/Ki67                                      |
| p16Ki67/p16Ki67  | Yes                     | HPV / 3 years      | p16/Ki67                                      |

IR: invitation + recall for woman who did not participate in IndScr in the last 3 years (non-participant)

†: women 25-35 are not eligible for HPV screening and receive a Pap-test every 3y instead. Women who tested HPV+/confirmation- go through double testing (HPV + Pap) the following year.

## MODEL STRUCTURE

Given the complexity of screening algorithms (different testing/retesting frequencies) and interactions between participation rates and individual characteristics (age and social), a Markov state microsimulation model was developed. Considering the relatively slow progression of intraepithelial lesions and the long-term benefits of screening, a 1-year cycle-length was used. The model was adapted from a previously published cohort-based Markov model.[10] A cohort of 100,000 women was simulated. Due to the long-term development of the disease and its consequences, a lifetime horizon was applied.

The model first generates a woman with a randomly attributed age, IndScr participation and frequency, health state (HPV-, HPV+, CIN lesions or cancer) and vaccination attributes. At each cycle, women can progress through states that correspond to CC natural history: non-infected women can get an HPV infection according to an age- and vaccination-dependent risk. The infection can progress to CIN1, then CIN2/3 and finally FIGO 1 (Federation of Gynecology and Obstetrics) classified non-invasive cancer. HPV infection and CIN lesions can regress spontaneously until CIN2/3 lesions have become persistent (pCIN2/3). Women in the pCIN2/3 state systematically progress to cancer at an

1  
2  
3 age-dependant rate. FIGO1 lesions can progress to FIGO 2, 3 and 4 and become symptomatic. Once  
4 symptomatic, the lesion is treated and the woman remains in the corresponding treated state with  
5 an associated cancer mortality rate. An age-specific general mortality applies at any state.  
6

7 Each year, the model determines whether the woman undergoes screening individually or after  
8 invitation based on her participation periodicity, time since last screening and participation rates  
9 after invitation. Invitations are sent to non-participant women in the manner of prevention  
10 campaigns, following the screening recommended frequency (i.e. 3 years in the case of Pap/Pap).  
11 Therefore, only a fraction of non-participant women are invited every year. The same primary  
12 screening modality is applied to OS and IndScr participants. Screening test results (positivity and  
13 lesion type for Pap tests and positivity for HPV and p16/Ki67) are determined based on the current  
14 state and type of test performed (supplementary file 2). After diagnosis, women with a non-  
15 cancerous lesion return to the non-infected state after conization and cancerous lesions are treated.  
16 The structure of the modelled natural history is presented in figure 1. More details on the model  
17 structure are given in the supplementary file 3.  
18  
19

## 20 INPUT DATA

21 The input data used in the simulation are presented in table 2.  
22

23 The population characteristics are based on available epidemiologic and demographic data that are  
24 representative of the French population. Vaccination status is only determined in women  $\leq 30$  years  
25 old, as it was only recently available in France. IndScr participation and frequency depend on age and  
26 social status, and based on the national health insurance database (supplementary file 4),  
27 approximately 61.9 % of eligible women were found to participate in IndScr at a frequency  $\leq 4$   
28 years.[3] Distribution of each modelled health state by age was not available in France and was  
29 estimated by simulating a cohort of non-vaccinated 14-year-old women undergoing current IndScr-  
30 only screening over their lifetime (supplementary file 3).  
31  
32

33 Transition probabilities (TP) were based on a previously published model.[10] The HPV infection and  
34 pCIN2/3 to cancer progression probabilities were calibrated using the model to reproduce observed  
35 HPV and cancer prevalence by age.[1;11] The high-risk HPV annual infection rate was estimated to be  
36 3.5% to 14%, depending on age.[12] The impact of vaccination is simulated by applying a relative risk  
37 (RR) of infection.[1]  
38

39 Probabilities of cancer progression and emergence of symptoms were obtained from the CC natural  
40 history simulation model developed by Myers *et al.*[13] The cancer specific-mortality by grade and  
41 time since diagnosis was estimated from SEER using data for white women under 50, as it was  
42 assumed that non-specific mortality was low in this group.[14] General mortality was modelled  
43 according to the French national statistics office (INSEE) data.  
44

45 The participation rates after invitation and recall, LtFU rate associated with IndScr, OS effect on LtFU  
46 (RR=0.88), observed lesions on Pap smear and associated care were all based on observational data  
47 from French OS experimentations.[1]  
48

49 The sensitivity and specificity of screening tests were based on clinical studies for detecting CIN2/3  
50 lesions and took into account the test sequence (i.e., HPV after Pap or primary HPV).[9;15-17] One  
51 percent of Pap tests were non-interpretable, which led to a retest.[18] Colposcopy was assumed to  
52 have 100% sensitivity and specificity. A 95% efficacy was considered for conization.  
53  
54

55 The model estimated OS cost and direct medical costs from a collective, "all payers" perspective, as  
56 recommended for France.[19] The OS costs covered invitations and recalls, as well as database  
57  
58  
59  
60

management, tracking of women's participation and FU management. Cost data for consultations and medical care were based on national tariffs. No extra-consultation costs were added, as it was considered that IndScr participants did so during a routine consultation. The HPV-analysis tariff was decreased by 60% in strategies with primary HPV-testing, assuming a substantial cost reduction in cases of an adoption of HPV-testing based OS. This assumption was validated by health insurance and health ministry representatives. According to public-health law, no extra co-payment is applied to OS participants. Cancer states were associated with costs accounting for care and FU by FIGO stage [12] when entering the corresponding diagnosed state. All costs were updated to 2016, using the national consumer price index for healthcare goods and services.

Table 2 Input data

| Parameter                         | Value                                              | Distribution | Source                                                                                                                                          |
|-----------------------------------|----------------------------------------------------|--------------|-------------------------------------------------------------------------------------------------------------------------------------------------|
| <b>Demographic</b>                |                                                    |              |                                                                                                                                                 |
| Age                               | 25 - 65<br>Based on distribution                   | NA           | National Statistics (INSEE)                                                                                                                     |
| CMU-c Eligibility (social status) | 12.2 % (9.8% - 14.6%)                              | Normal       | National Health Insurance Data                                                                                                                  |
| IndScr participation periodicity  | Based on frequency distribution, age and social    | Uniform      | National Health Insurance Data                                                                                                                  |
| Initial Health State              | Based on distribution                              | NA           | Based on model prediction for a cohort of 14-year-old women                                                                                     |
| <b>Transition probabilities</b>   |                                                    |              |                                                                                                                                                 |
| HR-HPV infection                  | 0.03 - 0.15 (0.03 - 0.18)<br>Based on distribution | Beta         | Estimated to reproduce known prevalence by age [12]                                                                                             |
| HPV-infection regression          | 0.50 (0.40 - 0.60)                                 | Beta         | Riethmuller et al. (1999)[19], Clavel et al. (2001)[20], Boulanger et al. (2004)[21], Beby-Defaux et al. (2004)[22], Dalstein et al. (2004)[23] |
| HR-HPV Infection → CIN 1          | 0.05 (0.04 - 0.06)                                 | Beta         | Moscicki et coll. (2001)[24]                                                                                                                    |
| CIN1 Regression                   | 0.50 (0.40 - 0.60)                                 | Beta         | Melnikow et coll. (1998)[25], Nobbenhuis et coll. (2001)[26], Sanders and Taira (2003)[27], Van De Velde et coll. (2007)[28]                    |
| CIN1 → CIN 2/3                    | 0.12 (0.10 - 0.14)                                 | Beta         | Melnikow et coll. (1998)[25], Sanders and Taira (2003)[27], Van De Velde et coll. (2007)[28]                                                    |
| CIN2/3 Regression                 | 0.28 (0.22 - 0.33)                                 | Beta         | Melnikow et coll. (1998)[25]                                                                                                                    |
| CIN2/3 → pCIN 2/3                 | 0.13 (0.10 - 0.15)                                 | Beta         | Melnikow et coll. (1998)[25]                                                                                                                    |
| Persistent CIN 2/3 → FIGO I       | 0.01 - 0.05 (0.01 - 0.06)<br>Based on distribution | Beta         | Estimated to reproduce known prevalence by age[1.11]                                                                                            |
| FIGO I → FIGO II                  | 0.20 (0.16 - 0.24)                                 | Beta         | Myers et al. 2000[13]                                                                                                                           |
| FIGO II → FIGO III                | 0.26 (0.21 - 0.31)                                 | Beta         | Myers et al. 2000[13]                                                                                                                           |
| FIGO III → FIGO IV                | 0.36 (0.29 - 0.43)                                 | Beta         | Myers et al. 2000[13]                                                                                                                           |
| FIGO I → Symptomatic FIGO I       | 0.15 (0.12 - 0.18)                                 | Beta         | Myers et al. 2000[13]                                                                                                                           |
| FIGO II → Symptomatic FIGO II     | 0.23 (0.18 - 0.27)                                 | Beta         | Myers et al. 2000[13]                                                                                                                           |
| FIGO III → Symptomatic FIGO III   | 0.60 (0.48 - 0.71)                                 | Beta         | Myers et al. 2000[13]                                                                                                                           |
| FIGO VI → Symptomatic FIGO IV     | 0.90 (0.67 - 1.00)                                 | Beta         | Myers et al. 2000[13]                                                                                                                           |
| 1-year Cancer Survival            | 0.43 - 0.98 (0.23 - 0.99)<br>By stage              | Beta         | SEER[14]                                                                                                                                        |
| 5-year Cancer Survival            | 0.14 - 0.94 (0.06 - 0.97)<br>By stage              | Beta         | SEER[14]                                                                                                                                        |
| 10-year Cancer Survival           | 0.05 - 0.93 (0.01 - 0.96)<br>By stage              | Beta         | SEER[14]                                                                                                                                        |
| <b>Screening</b>                  |                                                    |              |                                                                                                                                                 |
| Participation after invitation    | 17.3% (10.0% - 24.0%)                              | Uniform      | Hamers et al. 2014[6]                                                                                                                           |
| Participation after recall        | 12.1% (5.0% - 18.0%)                               | Uniform      | Hamers et al. 2014[6]                                                                                                                           |
| Lost to follow-up with IndScr     | Based on lesion on Pap.<br>Average 27.7%           | NA           | Hamers et al. 2014[6]                                                                                                                           |

|                                           |                                |         |                                                                                   |
|-------------------------------------------|--------------------------------|---------|-----------------------------------------------------------------------------------|
| Reduction in lost to follow-up with OS    | 0.77 (0.08 – 0.77)             | Uniform | OS experimentations, INCA personal communication                                  |
| Lesions on PAP                            | Distribution                   | NA      | Hamers <i>et al.</i> 2014[6]                                                      |
| Care per lesion                           | Distribution                   | NA      | Hamers <i>et al.</i> 2014[6]                                                      |
| Primary Pap-test (Se)                     | 70.0 % (57.0 % - 80.0 %)       | Beta    | Mustafa <i>et al.</i> (2015)[15]                                                  |
| Confirmation Pap-test after HPV+ (Se)     | 85.9 % (76.6 % - 92.1 %)       | Beta    | Bergeron <i>et al.</i> (2015)[9]                                                  |
| Primary HPV-test (Se)                     | 94.0 % (89.0 % - 97.0 %)       | Beta    | Mustafa <i>et al.</i> (2015)[15]                                                  |
| Confirmation HPV-test after Pap+ (Se)     | 100.0 % (NR)                   | NA      | Mayrand <i>et al.</i> (2007)[17]                                                  |
| p16/Ki67 (Se)                             | 86.7 % (81.1 % - 90.9 %)       | Beta    | Ikenberg <i>et al.</i> (2013)[16]                                                 |
| Colposcopy (Se)                           | 100.0% (NA)                    | NA      | Assumption                                                                        |
| Primary Pap-test (Sp)                     | 95.0 % (92.0 % - 97.0 %)       | Beta    | Mustafa <i>et al.</i> (2015)[15]                                                  |
| Confirmation Pap-test after HPV+ (Sp)     | 65.9 % (63.1 % - 68.6 %)       | Beta    | Bergeron <i>et al.</i> (2015)[9]                                                  |
| Primary HPV-test (Sp)                     | 90.0 % (86.0 % - 93.0 %)       | Beta    | Mustafa <i>et al.</i> (2015)[15]                                                  |
| Confirmation HPV-test after Pap+ (Sp)     | 61.1 % (NR)                    | NA      | Mayrand <i>et al.</i> (2007)[17]                                                  |
| p16/Ki67 (Sp)                             | 95.2 % (94.9 % - 95.4 %)       | Beta    | Ikenberg <i>et al.</i> (2013)[16]                                                 |
| Colposcopy (Sp)                           | 100.0% (NA)                    | NA      | Assumption                                                                        |
| Conisation efficacy                       | 95.0%                          | NA      | Assumption                                                                        |
| Non-interpretable tests                   | 1.0% (1.0% - 3.0%)             | Uniform | Hamers <i>et al.</i> 2014[6]                                                      |
| <b>Costs (€)</b>                          |                                |         |                                                                                   |
| Pap-test (IndScr)                         | 47.78 (38.88 – 57.59)          | Gamma   | National tariffs                                                                  |
| Pap-test (OS)                             | 49.62 (40.37 – 59.81)          | Gamma   | National tariffs                                                                  |
| p16/Ki67 (IndScr)                         | 86.77 (70.60 - 104.58)         | Gamma   | National tariffs                                                                  |
| p16/Ki67 (OS)                             | 88.61 (72.09 - 106.80)         | Gamma   | National tariffs                                                                  |
| HPV-test (IndScr)                         | 47.70 (75.48 - 97.17)          | Gamma   | National tariffs                                                                  |
| HPV-test (OS)                             | 49.54 (49.54 - 71.24)          | Gamma   | National tariffs                                                                  |
| Confirmation Pap-test (IndScr)            | 78.17 (63.60 - 94.21)          | Gamma   | National tariffs                                                                  |
| Confirmation Pap-test (OS)                | 49.63 (40.38 - 59.82)          | Gamma   | National tariffs                                                                  |
| Confirmation p16/Ki67 (IndScr)            | 116.77 (78.09 - 99.57)         | Gamma   | National tariffs                                                                  |
| Confirmation p16/Ki67 (OS)                | 88.23 (71.79 - 106.34)         | Gamma   | National tariffs                                                                  |
| Confirmation HPV-test (IndScr)            | 78.09 (63.53 - 94.12)          | Gamma   | National tariffs                                                                  |
| Confirmation HPV-test (OS)                | 49.55 (49.55 - 71.03)          | Gamma   | National tariffs                                                                  |
| Colposcopy                                | 49.82 (40.54 - 60.05)          | Gamma   | National tariffs                                                                  |
| Conization                                | 93.42 (76.01 - 112.60)         | Gamma   | National tariffs                                                                  |
| FIGO I CC treatment                       | 1041.95 (847.77 - 1255.85)     | Gamma   | Dervaux <i>et al.</i> 2007[12]                                                    |
| FIGO II CC treatment                      | 1818.86 (1479.90 - 2192.25)    | Gamma   | Dervaux <i>et al.</i> 2007[12]                                                    |
| FIGO III CC treatment                     | 25817.84 (21006.43 - 31117.97) | Gamma   | Dervaux <i>et al.</i> 2007[12]                                                    |
| FIGO IV CC treatment                      | 30582.83 (24883.41 - 36861.16) | Gamma   | Dervaux <i>et al.</i> 2007[12]                                                    |
| Database management + Invitation dispatch | 7.00 (4.00 – 11.00)            | Gamma   | Cost of invitation to colorectal OS (Heath Ministry data, personal communication) |
| Recall dispatch                           | 0.40 (0.40 – 3.25)             | Gamma   | 50% postal charges                                                                |

## VALIDATION

The model results were compared to observed epidemiological data for validation. The model faithfully reproduces cancer incidence and CC mortality in France.[12] Results of the model validation are available in supplementary file 5.

## COST-EFFECTIVENESS ANALYSES

Incremental cost-effectiveness ratios (ICER) were calculated for the life expectancy. Costs and survival were discounted at 4% per year, according to French guidelines for cost-effectiveness studies.[18]

Several alternative scenarios were tested, including not applying the efficacy of OS on LtfU rate, not considering a reduction in HPV cost, and assuming a 60% reduction in p16/Ki67 cost.

The robustness of the model was tested using deterministic sensitivity analysis (DSA). In the DSA, all of the parameters were tested at their confidence intervals (or at  $\pm 20\%$  of the baseline value when the confidence intervals were not available).

## RESULTS

Compared with the current situation, invitation and recall of non-participant women led to an increase from 61.9% to 65.5% in the 4-year participation rate. Every strategy that was tested was associated with a reduction in cancer incidence/mortality, ranging from -14.2%/-13.5% for the Pap/Pap strategy to -22.9%/-25.8% for the HPV/p16Ki67-5y strategy. The undiscounted results are presented in table 3.

Table 3 Undiscounted results

| Scenario        | Outcomes |                  | Costs (€) per woman |           |                       |         |
|-----------------|----------|------------------|---------------------|-----------|-----------------------|---------|
|                 | Cancer   | Cancer mortality | OS organisation     | Screening | CC care & conizations | Total   |
| IndScr only*    | 34       | 13               | 0                   | 294.2     | 30.9                  | 325.0   |
| Pap/Pap         | -14.2%   | -13.5%           | +19.57              | +13.32    | -3.92                 | +28.97  |
| Pap/p16Ki67     | -16.6%   | -15.9%           | +19.57              | +18.46    | -4.57                 | +33.46  |
| HPV/Pap-3y      | -21.1%   | -22.4%           | +15.16              | +99.87    | -7.31                 | +107.73 |
| HPV/Pap-5y      | -18.9%   | -22.5%           | +15.12              | -29.79    | -7.24                 | -21.91  |
| HPV/Pap-10y     | -8.0%    | -13.6%           | +14.94              | -14.42    | -0.48                 | -134.04 |
| HPV/p16Ki67-5y  | -22.9%   | -25.8%           | +15.10              | +1.57     | -0.81                 | +8.55   |
| HPV/p16Ki67-10y | -11.9%   | -17.0%           | +14.93              | -129.7    | -5.87                 | -120.63 |
| p16Ki67/p16Ki67 | -24.3%   | -24.4%           | +19.57              | +233.30   | -6.87                 | +246.00 |

\*Reference for other scenarios. Cumulated incidence and mortality for 10,000 women eligible for OS on a lifetime horizon.

The average undiscounted cost of screening for the modelled population over a lifetime was €325 per eligible woman, most of which was imputable to screening (€294). Strategies based on HPV-testing with 5-year and 10-year frequencies were cost-saving (-€22 and -€134 per woman, respectively), despite the additional cost of OS (€15). Other strategies were responsible for extra costs, ranging from €29 to €33 for Pap-based screening to €108 for HPV/Pap-3y and €246 for p16Ki67/p16Ki67.

Although it was the cheapest strategy (€191 per eligible woman), HPV/Pap-10y was the strategy with the smallest cancer reduction (-11.9%), as opposed to p16Ki67/p16Ki67, which led to a 25% reduction in CC while being the most expensive strategy (€571 per eligible woman). Figure 2 presents the mean cost per woman and cancer reduction rate for each strategy.



Discounted survival is consistent with CC incidence and mortality (table 4). Compared to the current situation (19.4 LY survival), OS strategies led to an increase in survival, ranging from 10 years per 10,000 women for the Pap/Pap and HPV/Pap-10y strategies to 18 years per 10,000 women for the HPV/p16Ki67 and p16Ki67/p16Ki67 strategies. Discounted extra costs per 10,000 eligible women ranged from €38,000 (HPV/Pap-5y) to €1,608,000 (p16Ki67/p16Ki67). HPV/Pap-5y and HPV/Pap-10y remained cost-saving after discounting. Hence, these strategies were more effective and more cost-saving than Pap-based strategies, including the current situation, and were the dominant OS strategies. HPV/p16Ki67-5y and p16Ki67/p16Ki67 were more effective than HPV/Pap-5y and HPV/Pap-10y with ICERs of €101,391 and €6,541,250 per LY, respectively. HPV/Pap-3y was as effective as HPV/Pap-5y but less effective than HPV/p16Ki67-5y while generating much more expenses.

Table 4 Discounted results

| Scenario        | Survival (LY) | Total cost (K€) | ICER (€/LY) vs current | Frontier       |
|-----------------|---------------|-----------------|------------------------|----------------|
| IndScr only*    | 19.4          | 122.6           | Reference              | Dominated      |
| Pap/Pap-HPV     | +10.04        | +22.3           | 22,234                 | Dominated      |
| Pap/p16Ki67     | +11.68        | +25.5           | 21,918                 | Dominated      |
| HPV/Pap-3y      | +15.93        | +55.8           | 35,095                 | Dominated      |
| HPV/Pap-5y      | +15.89        | -13.3           | Dominant               | Ext. Dominated |
| HPV/Pap-10y     | +10.51        | -73.4           | Dominant               | Reference      |
| HPV/p16Ki67-5y  | +18.13        | +3.79           | 2,091                  | 101,389        |
| HPV/p16Ki67-10y | +13.00        | -64.6           | Dominant               | 35,846         |
| p16Ki67/p16Ki67 | +18.37        | +160.7          | 87,546                 | 6,592,441      |

\*Reference for other scenarios. Extra-survival per 10,000 women eligible for OS on a lifetime horizon. LY: Life Years

Regardless of the modality, implementing an OS programme for cervical cancer in France led to an overall improvement in the CC screening rate and a reduction in CC incidence and mortality. Reducing LtFU rates and improving screening rates with invitations/recall as in the Pap/Pap scenario results in an ICER of €22,231 per LY and an average extra survival of 10 LY per 10,000 eligible women.

Switching primary screening from the Pap-test to HPV-testing led to similar LY gains with a 10-year screening frequency, yet the 5-year frequency led to a longer survival (15.89 vs. 10.51 LY per 10,000 eligible women). Furthermore, reducing the frequency of primary testing was cost-saving, even at the current cost of HPV-testing. Despite the longer interval between the two screening tests, HPV-based strategies remained effective because of their superior sensitivity compared to the Pap-test.

The very good sensitivity/specificity of p16/Ki67 double-staining used as a primary screening test led to significant survival gains compared to the current situation and HPV-testing (+18.37 and +2.48 per 10,000 eligible women, respectively). However, its high cost made it inefficient, with an ICER of €6,592,441/LY.

Switching the Pap test with p16/Ki67 double-staining in the confirmation of positive Pap and HPV primary tests increased efficacy and led to moderate additional costs. The confirmation of HPV tests every 10 years increased the survival from +10.51 to +13.0 LY and the costs from -€734,000 to -€646,000 per 10,000 eligible women. Thus, the HPV/p16Ki67-10y scenario was associated with an ICER of €35,846/LY. The cost-utility results do not lead to different conclusions. A cost-utility analysis was performed by applying specific health utilities to the health states and utility decrements to non-cancerous and cancerous states. Its results and the utility values used are available in a supplementary file 6.

## SENSITIVITY AND SCENARIO ANALYSES

Deterministic sensitivity analysis and scenario analyses for HPV/Pap-10y versus the current situation for LY and costs are shown in figure 3 and figure 4, respectively.

The parameters with the biggest impact were the cost of testing (HPV and Pap) and OS effect on LtFU rate after a positive result. However, HPV/Pap-10y systematically remained the most cost-effective alternative. The mean age of the cohort impacted results drastically, despite HPV screening being less beneficial in women under 30 years old and over 50 years old than in the rest of the eligible population. Vaccination rates up to 80% had a negligible impact. Similar results were seen for HPV/Pap-5y and HPV/p16Ki67-5y scenarios. Not taking into account the effect of OS on LtFU rate did not change the conclusion, although it significantly reduced the LY gains compared to in the IndScr only. Similarly, not considering a reduction in the cost of the HPV test led to similar conclusions: HPV/Pap-10y and HPV/Pap-5y remained less costly than the alternative strategies. Finally, a 60% reduction in p16/Ki67 cost led to a decreased total cost of €41.05 (-75%) for the p16Ki67/p16Ki67 scenario.

## DISCUSSION

Using a validated microsimulation model that allows for the fine modelling of screening modalities, we showed that the OS programme for cervical cancer in France leads to a reduction of CC incidence and mortality. HPV-based screening with 5- or 10-year frequencies would be cost-saving, and other modalities would generate extra costs ranging between €37.9 and €1,607 per woman.

Most model inputs were based on observed “real-life” data instead of simple screening guidelines. This allows for an accurate simulation of women’s screening behaviour by considering that many women do not comply with the recommended screening frequency and that older women tend to drop out of screening.[3] This also allowed for the implementation of current professional practices that significantly differ from recommended screening algorithms: in the current IndScr only situation, after a positive Pap test, not all women proceed to confirmation (Pap or HPV test), as some directly undergo colposcopy or conization, depending on the identified lesion with a significant impact on IndScr efficiency. Finally, the model incorporates LtFU rates, which proved to be a key factor in OS efficacy, particularly when screening frequency was superior to 5 years.[6]

The model’s main limitations stem from the estimation of the transition probabilities (TP). An initial literature review showed important variations between sources with some TP being not available. Additionally, the identified TP were not precise enough given the low incidence of lesions in the general population of women (1 in 10,000). Thus, we favoured sources that had previously been used in French models to allow comparability with previously published results.[10.12] Additionally, the model was calibrated on available prevalence data in France and externally validated. Furthermore, the sensitivity analyses showed that, despite the uncertainty, TP variations had a limited impact on the results, which reinforces our confidence in the estimations. Finally, our results are comparable to previously published European studies: Accetta *et al.* have found that an HPV test every 5 years is more effective and less costly than triennial Pap-tests in Italy.[29] The decreased efficiency of CC screening based on the HPVtest at lower frequencies was shown by Berkhof *et al.* in the Netherlands.[30] In Norway, Burger *et al.* found results comparable to ours for the Pap/Pap strategy.[31]

In our analysis, HPV/Pap-10y was the most efficient strategy, with HPV/p16Ki67-10y being a more cost-effective alternative. However, the final modality choice for OS-implementation will need to consider several factors. First, the HPV/Pap-10y strategy, albeit the most efficient, is the less effective strategy in terms of cancer incidence and prevalence reduction, conflicting with the primary

1  
2  
3 aim of the Cancer Plan to further reduce the CC burden in France [5] and thus making the HPV/Pap-  
4 5y a more suitable, cost-saving modality. Second, current screening behaviours in France result in  
5 over-participation, with numerous women performing Pap-tests more often than is recommended.  
6 This phenomenon is likely to be related to the yearly recommended consultation with a  
7 gynaecologist. Our results showed that going from a 5-year frequency to a 3-year frequency implies a  
8 huge increase in screening cost (from -€133,000 to +€558,000 per 10,000 eligible women) for a very  
9 small increase in survival (from 15.89 to 15.93). Indeed, HPV-testing is sensitive, but it has a low  
10 specificity and cervical lesion evolution is slow, with most lesions regressing spontaneously. Women's  
11 over-participation will thus be a challenge in the case of HPV-based OS implementation. This should  
12 be addressed beforehand, or these apparent efficient strategies would be poorly efficient, leading to  
13 frequent false-positive results and related unnecessary and potentially harmful testing. Third, HPV-  
14 testing is not recommended in women under 35 years of age, which would require a complex double  
15 screening system. Finally, the current screening organization in France is based on the Pap-test,  
16 which implies a different infrastructure. Switching to HPV would require the negotiation of HPV-test  
17 tariffs, the development of a quality assurance protocol to ensure a sensitivity that is consistent with  
18 those found during clinical studies, as well as the development of the required infrastructure and  
19 equipment. Thus, although primary HPV-testing produces results with a better efficiency, many  
20 challenges will need to be addressed before its implementation. In the meantime, switching to a Pap-  
21 test based OS remains an acceptable alternative and could lead the way to HPV-testing deployment.  
22  
23  
24

25  
26 As for p16/KI67 double-staining, our results show that it would be an efficient confirmation test or  
27 primary test with negotiated tariffs. However, the sensitivity and specificity of the test were based on  
28 a single study with centralized reading. Additional studies in different French settings would be  
29 required to confirm that the results are reproducible before generalization.  
30

31 Lastly, we do not present our results relatively to a willingness-to-pay threshold. This choice results  
32 from the fact that no cost-effectiveness threshold is relevant in France, since the national agency in  
33 charge of health technology assessment, including pharmacoeconomic evaluation (HAS) does not  
34 wish cost-effectiveness results to be compared to a threshold. Indeed, cost-effectiveness analyses  
35 are not used as a resource allocation tool for health technologies in France. Furthermore, since  
36 implementation of CC OS was decided, we did not aim to assess whether and how OS was efficient,  
37 but to determine which screening modality was the most efficient, keeping in mind practical issues.  
38 We feel that this choice is further reinforced by our results that confirm the legislator's decision to  
39 implement OS. In summary, this modelling study enabled the INCa to provide robust information to  
40 support a public decision on both efficient intermediate modalities for implementation of the CC OS  
41 programme and also on optimal screening strategies in a longer term and to anticipate the  
42 integration of promising technological innovations.  
43  
44  
45  
46  
47  
48  
49  
50  
51  
52  
53  
54  
55  
56  
57  
58  
59  
60

## Funding

This work was entirely funded by the National Cancer Institute.

## Declaration of interests

The authors have no conflict of interest to declare concerning this study.

## Authorship Statement

All authors participated in the study. Barré S, Leleu H and Massetti M participated in model development, data analysis and drafting of the manuscript. Barré S and De Bels F made critical review of the manuscript and approved its final version.

## Data Sharing

No additional data available.

## Notes/Acknowledgments

The authors acknowledge the members of the Scientific Committee for study for their critical review of the methodological choices, discussion of the results and conclusions of this medico-economic evaluation study:

Pr Jean Jacques Baldauf (Centre hospitalier universitaire de Strasbourg), Dr Anne Sophie Banaszuk (Structure de gestion du Maine et Loire), Nathalie Beltzer (Santé Publique France), Dr Mohamed-Béchir Ben Hadj Yahia (Centre hospitalier régional universitaire de Lille), Julia Bonastre (Institut Gustave Roussy), Dr Véronique Dalstein (Centre hospitalier universitaire Reims), Dr Marie Flori (Université de Lyon 1), Julie Gaillot (Institut National du Cancer), Chrystelle Gastaldi-Ménager (Caisse nationale d'assurance maladie des travailleurs salariés), Ken Haguenoer (Centre hospitalier régional universitaire de Tours), Françoise Hamers (Santé Publique France), Guy Launoy (Centre hospitalier universitaire de Caen, Inserm), Patricia Lucidarme (Collège national des sages-femmes), Emmanuel Ricard (Ligue Nationale contre le cancer), Jean-Paul Romarin (Agence régionale de santé du Languedoc-Roussillon Midi-Pyrénées), Catherine Rumeau-Pichon (Haute Autorité de Santé), Emmanuelle Salines (Ministère de la Santé) Nadia Thomas (Structure de gestion de Guyane), Alain Trugeon (Observatoire régional de santé de Picardie), Hélène Vandewalle (Institut National du Cancer), Anne Sophie Woronoff (Registre des cancers du Doubs), Laura Zanetti (Haute Autorité de Santé)

## Figure Legends

Figure 1: Structure of the model for the natural history of cervical cancer

Figure 2: Results of OS strategies assessed on cancer reduction rate and associated mean cost

Figure 3: Tornado diagram of DSA and scenario analyses with the biggest impact on survival for HPV/Pap-10y versus current situation

Figure 4: Tornado diagram of DSA and scenario analyses with the biggest impact on costs for HPV/Pap-10y versus current situation

## REFERENCES

1. Haute Autorité de Santé. État des lieux et recommandations pour le dépistage du cancer du col de l'utérus en France. 2010. [http://www.has-sante.fr/portail/jcms/c\\_1009772/fr/etat-des-lieux-et-recommandations-pour-le-depistage-du-cancer-du-col-de-l-uterus-en-France](http://www.has-sante.fr/portail/jcms/c_1009772/fr/etat-des-lieux-et-recommandations-pour-le-depistage-du-cancer-du-col-de-l-uterus-en-France)
2. Monnereau A, Remontet L, Maynadié, *et al.* Estimation nationale de l'incidence des cancers en France entre 1980 et 2012. Etude à partir des registres des cancers du réseau Francim - Partie 1 : tumeurs solides. 2013. <http://invs.santepubliquefrance.fr/Publications-et-outils/Rapports-et-syntheses/Maladies-chroniques-et-traumatismes/2013/Estimation-nationale-de-l-incidence-des-cancers-en-France-entre-1980-et-2012>
3. Institut National du Cancer. Généralisation du dépistage du cancer du col de l'utérus /Étude médico-économique /Phase 1. 2015. <http://www.e-cancer.fr/Expertises-et-publications/Catalogue-des-publications/Synthese-Generalisation-du-depistage-du-cancer-du-col-de-l-uterus-etude-medico-economique-Phase-1>
4. Institut de Veille Sanitaire. Vaccination rate among women under 30. 2015. Personal Communication
5. Ministère des Affaires sociales et de la santé, Ministère de l'Enseignement supérieur et de la recherche. Plan Cancer 2014-2019, Guérir et prévenir les cancers : donnons les mêmes chances à tous, partout en France. 2014. <http://www.e-cancer.fr/Plan-cancer/Plan-cancer-2014-2019-priorites-et-objectifs>
6. Hamers FF, Duport N, Beltzer N. Population-based organized cervical cancer screening pilot program in France. *Eur J Cancer Prev.* 2017 Mar 30.
7. Haguenoer K, Sengchanh S, Gaudy-Graffin C, *et al.* Vaginal self-sampling is a cost-effective way to increase participation in a cervical cancer screening programme: a randomised trial. *British journal of cancer.* 2014;111(11):2187-96.
8. Dalstein V, Charlier B, Botokey J, *et al.* Évaluation intermédiaire de START -HPV, programme pilote de dépistage primaire par test HPV des lésions précancéreuses et cancéreuses du col utérin dans le département des Ardennes, France, 2012-2013. *Bull Epidémiol Hebd.* 2014(13-14-15):254-9.
9. Bergeron C, Ikenberg H, Sideri M, *et al.* Prospective evaluation of p16/Ki-67 dual-stained cytology for managing women with abnormal Papanicolaou cytology: PALMS study results. *Cancer Cytopathol.* 2015;123(6):373-81.
10. Demarteau N, Detournay B, Tehard B, *et al.* A generally applicable cost-effectiveness model for the evaluation of vaccines against cervical cancer. *International journal of public health.* 2011;56(2):153-62.
11. Binder-Foucard F, Belot A, Delafosse P, *et al.* Estimation nationale de l'incidence et de la mortalité par cancer en France entre 1980 et 2005. Etude à partir des registres des cancers du réseau Francim - Partie 1 : tumeurs solides. 2008 <http://invs.santepubliquefrance.fr/Publications-et-outils/Rapports-et-syntheses/Maladies-chroniques-et-traumatismes/2013/Estimation-nationale-de-l-incidence-et-de-la-mortalite-par-cancer-en-France-entre-1980-et-2012>
12. Dervaux B, Lenne X, Lévy-Bruhl D, *et al.* Modélisation médico-économique de l'impact de l'organisation du dépistage du cancer du col utérin et de l'introduction de la vaccination contre les HPV dans le calendrier vaccinal. 2008. [https://www.mesvaccins.net/textes/rapport\\_modelisation\\_hpv.pdf](https://www.mesvaccins.net/textes/rapport_modelisation_hpv.pdf)

13. Myers E R, McCrory D C, Nanda K, *et al*. Mathematical model for the natural history of human papillomavirus infection and cervical carcinogenesis. *American journal of epidemiology*. 2000;151(12):1158-71.
14. Wright J D, Chen L, Tergas A I, *et al*. Population-level trends in relative survival for cervical cancer. *Am J Obstet Gynecol*. 2015.
15. Mustafa R A, Santesso N, Khatib R, *et al*. Systematic reviews and meta-analyses of the accuracy of HPV tests, visual inspection with acetic acid, cytology, and colposcopy. *Int J Gynaecol Obstet*. 2016;132(3):259-65.
16. Ikenberg H, Bergeron C, Schmidt D, *et al*. Screening for cervical cancer precursors with p16/Ki-67 dual-stained cytology: results of the PALMS study. *Journal of the National Cancer Institute*. 2013;105(20):1550-7.
17. Mayrand M. H, Duarte-Franco E, Rodrigues I, *et al*. Human papillomavirus DNA versus Papanicolaou screening tests for cervical cancer. *N Engl J Med*. 2007;357(16):1579-88.
18. Haute Autorité de Santé. Choix méthodologiques pour l'évaluation médico-économique à la HAS. 2011. [http://www.has-sante.fr/portail/upload/docs/application/pdf/2011-11/guide\\_methodo\\_vf.pdf](http://www.has-sante.fr/portail/upload/docs/application/pdf/2011-11/guide_methodo_vf.pdf)
19. Riethmuller D, Gay C, Bertrand X, *et al*. Genital human papillomavirus infection among women recruited for routine cervical cancer screening or for colposcopy determined by Hybrid Capture II and polymerase chain reaction. *Diagn Mol Pathol*. 1999;8(3):157-64.
20. Clavel C, Masure M, Bory J P, *et al*. Human papillomavirus testing in primary screening for the detection of high-grade cervical lesions: a study of 7932 women. *British journal of cancer*. 2001;84(12):1616-23.
21. Boulanger J C, Sevestre H, Bauville E, *et al*. [Epidemiology of HPV infection]. *Gynecol Obstet Fertil*. 2004;32(3):218-23.
22. Beby-Defaux A, Bourgoin A, Ragot S, *et al*. Human papillomavirus infection of the cervix uteri in women attending a Health Examination Center of the French social security. *Journal of medical virology*. 2004;73(2):262-8.
23. Dalstein V, Riethmuller D, Sautiere J L, *et al*. Detection of cervical precancer and cancer in a hospital population; benefits of testing for human papillomavirus. *European journal of cancer (Oxford, England : 1990)*. 2004;40(8):1225-32.
24. Moscicki A B, Hills N, Shiboski S, *et al*. Risks for incident human papillomavirus infection and low-grade squamous intraepithelial lesion development in young females. *Jama*. 2001;285(23):2995-3002.
25. Melnikow J, Nuovo J, Willan A R, *et al*. Natural history of cervical squamous intraepithelial lesions: a meta-analysis. *Obstetrics and gynecology*. 1998;92(4 Pt 2):727-35.
26. Nobbenhuis M A, Helmerhorst T J, van den Brule A J, *et al*. Cytological regression and clearance of high-risk human papillomavirus in women with an abnormal cervical smear. *Lancet*. 2001;358(9295):1782-3.
27. Sanders G D, Taira A V. Cost-effectiveness of a potential vaccine for human papillomavirus. *Emerg Infect Dis*. 2003;9(1):37-48.

- 1  
2  
3 28. Van de Velde N, Brisson M, Boily M C Modeling human papillomavirus vaccine effectiveness:  
4 quantifying the impact of parameter uncertainty. *American journal of epidemiology*.  
5 2007;165(7):762-75.  
6  
7 29. Accetta G, Biggeri A, Carreras G, *et al*. Is human papillomavirus screening preferable to  
8 current policies in vaccinated and unvaccinated women? A cost-effectiveness analysis. *Journal of*  
9 *medical screening*. 2010;17(4):181-9.  
10  
11 30. Berkhof J, Coupe V M, Bogaards J A, *et al*. The health and economic effects of HPV DNA  
12 screening in The Netherlands. *International journal of cancer Journal international du cancer*.  
13 2010;127(9):2147-58.  
14  
15 31. Burger E A, Kim J J. The value of improving failures within a cervical cancer screening  
16 program: an example from Norway. *International journal of cancer Journal international du cancer*.  
17 2014;135(8):1931-9.  
18  
19  
20  
21  
22  
23  
24  
25  
26  
27  
28  
29  
30  
31  
32  
33  
34  
35  
36  
37  
38  
39  
40  
41  
42  
43  
44  
45  
46  
47  
48  
49  
50  
51  
52  
53  
54  
55  
56  
57  
58  
59  
60

1  
2  
3  
4  
5  
6  
7  
8  
9  
10  
11  
12  
13  
14  
15  
16  
17  
18  
19  
20  
21  
22  
23  
24  
25  
26  
27  
28  
29  
30  
31  
32  
33  
34  
35  
36  
37  
38  
39  
40  
41  
42  
43  
44  
45  
46  
47  
48  
49  
50  
51  
52  
53  
54  
55  
56  
57  
58  
59  
60



Structure of the model for the natural history of cervical cancer

86x36mm (300 x 300 DPI)

Peer review only





Results of OS strategies assessed on cancer reduction rate and associated mean cost

119x76mm (300 x 300 DPI)

Review only

1  
2  
3  
4  
5  
6  
7  
8  
9  
10  
11  
12  
13  
14  
15  
16  
17  
18  
19  
20  
21  
22  
23  
24  
25  
26  
27  
28  
29  
30  
31  
32  
33  
34  
35  
36  
37  
38  
39  
40  
41  
42  
43  
44  
45  
46  
47  
48  
49  
50  
51  
52  
53  
54  
55  
56  
57  
58  
59  
60

1  
2  
3  
4  
5  
6  
7  
8  
9  
10  
11  
12  
13  
14  
15  
16  
17  
18  
19  
20  
21  
22  
23  
24  
25  
26  
27  
28  
29  
30  
31  
32  
33  
34  
35  
36  
37  
38  
39  
40  
41  
42  
43  
44  
45  
46  
47  
48  
49  
50  
51  
52  
53  
54  
55  
56  
57  
58  
59  
60

Results of DSA and scenario analyses with the biggest impact on survival for organised screening by invitation and recall of non-participant eligible women to perform a HPV-test every 10 years (Pap-test confirmation) versus current situation



Tornado diagram of DSA and scenario analyses with the biggest impact on survival for HPV/Pap-10y versus current situation

102x67mm (300 x 300 DPI)

view only

1  
2  
3  
4  
5  
6  
7  
8  
9  
10  
11  
12  
13  
14  
15  
16  
17  
18  
19  
20  
21  
22  
23  
24  
25  
26  
27  
28  
29  
30  
31  
32  
33  
34  
35  
36  
37  
38  
39  
40  
41  
42  
43  
44  
45  
46  
47  
48  
49  
50  
51  
52  
53  
54  
55  
56  
57  
58  
59  
60

Results of DSA and scenario analyses with the biggest impact on costs for organised screening by invitation and recall of non-participant eligible women to perform a HPV-test every 10 years (Pap-test confirmation) versus current situation



Tornado diagram of DSA and scenario analyses with the biggest impact on costs for HPV/Pap-10y versus current situation

102x67mm (300 x 300 DPI)

View only

Supplementary File 1 Screening algorithms



## Supplementary File 2 Pap-test results depending on HPV infection or lesion type

|                     | ASCUS  | ASC   | AC    | LSIL   | HSIL   | Cancer |
|---------------------|--------|-------|-------|--------|--------|--------|
| HPV-                | 53.5%  | 1.5%  | 2.7%  | 40.1%  | 2.3%   | 0.0%   |
| HPV+                | 53.5%  | 1.5%  | 2.7%  | 40.1%  | 2.3%   | 0.0%   |
| CIN1                | 53.5 % | 1.5 % | 2.7 % | 40.1 % | 2.3 %  | 0.0 %  |
| CIN2/3              | 26.2 % | 6.0 % | 9.6 % | 32.4 % | 23.2 % | 2.6 %  |
| Cancer (all stages) | 0.0%   | 0.0%  | 0.0%  | 0.0%   | 0.0%   | 100.0% |

## Follow-up of positive Pap-test, by Pap-test result

|        | Confirmation<br>Pap-test | Confirmation<br>HPV-test | Colposcopy | Conization | Lost to follow-up |
|--------|--------------------------|--------------------------|------------|------------|-------------------|
| ASCUS  | 36,9 %                   | 10,8 %                   | 23,9 %     | 1,3 %      | 27,1 %            |
| ASC    | 36,3 %                   | 0,0 %                    | 48,8 %     | 7,1 %      | 7,8 %             |
| AC     | 6,5 %                    | 0,0 %                    | 30,7 %     | 7,0 %      | 55,9 %            |
| LSIL   | 36,2 %                   | 0,0 %                    | 32,0 %     | 3,5 %      | 28,3 %            |
| HSIL   | 21,4 %                   | 0,0 %                    | 50,1 %     | 19,1 %     | 9,4 %             |
| Cancer | 10,0 %                   | 0,0 %                    | 85,0 %     | 5,0 %      | 0,0 %             |

## Supplementary File 3 Extended model presentation

Due to the complexity of screening algorithms and screening pace depending on the women's history and interactions that exist between screening and individual characteristics, a stochastic microsimulation model based on a Markov methodology and a 1-year cycle length was adapted based on a previously published Markov cohort-based model that has been updated.

Given the importance of individual characteristics, the analysis is based on the simulation of closed cohorts of women eligible for CC screening and representative in terms of age, HPV infection and precancerous and cancerous lesions in order to assess the actual cost-effectiveness of SO implementation in eligible women. Therefore, the results of the model specifically address the efficiency of the various OS strategies assessed and do not allow for epidemiological prediction.

According to the French national health authority (HAS), the model perspective is the collective perspective, meaning that costs borne by all payers are taken into consideration. Costs and survival results are discounted at a 4% annual rate.

The model is programmed in C++. Input data and scenario definition are entered through a Microsoft Excel interface. Model results are then exported to Excel to generate the figures and tables.

### Women generation

The model first generates women with the following characteristics: age (25-56), participant in IndScr, period between carrying out two voluntary IndScr, health state at model initiation and vaccination status. Due to the recent introduction of vaccination, only women aged under 30 can be vaccinated.

### Natural history of CC

Women then initiate the simulation of CC's natural history. At each cycle, non-HPV-infected women can become infected. This infection can spontaneously regress or progress and lead to grade 1 cervical intraepithelial neoplasia (CIN 1). CIN1 lesions can become pre-cancerous (grades 2 and 3 cervical intraepithelial neoplasia, CIN2/3). Once CIN 2/3 lesions have become persistent, they cannot regress spontaneously any longer and can only progress to cancerous lesions of first grade, based on the International Federation of Gynecology and Obstetrics (FIGO) classification. FIGO I CC can progress to grades 2, 3 and 4 and/or become symptomatic, leading to diagnosis of the CC and treatment initiation. Cancer mortality based on cancer severity grade and time since diagnosis is applied to women with symptomatic/diagnosed cancer. Women can die of age-specific general mortality at any state. See figure 1 for the structure of the model.

Considering the age distribution of the cohort and its low adoption in France (17% of women under 30), the effect of vaccination is simulated by applying a relative risk of infection by oncogenic HPV to vaccinated women (i.e. herd immunity is not considered).

### Screening

Each year, the model determines whether the simulated woman performs IndScr based on her status (participant in IndScr or not) and her specific IndScr frequency, both parameters generated at the initiation and updated throughout the simulation. If the woman has not performed a CC screening or received an OS invitation/recall for a period that exceeds the OS periodicity, she receives an invitation to participate. Women that are still NP receive a recall during the same cycle.

Invitation and recall modalities determine different participation probabilities upon receiving. During the screening cycle, IndScr and OS participants perform the screening test determined by the OS

strategy assessed. Test characteristics (sensitivity/specificity) and the screening algorithm determine the result of the primary screening test based on the actual health state of the woman as well as the follow-up actions in case of positive results. Follow-up includes confirmation tests, colposcopy and conizations. Some women become lost to follow-up. Women diagnosed with CC switch to the corresponding diagnosed state.

### Women’s characteristics

The modelled population corresponds to all women aged 25 to 65, that is, all women eligible for IndScr according to current recommendations. Age distribution within the population is based on the national statistics office (INSEE) data.

Twelve percent (12.2%) of the eligible women were found to benefit from the universal complementary health insurance (CMU-c) in an analysis of a representative sample of the French SHI general regimen (employees). Vaccination rate among women aged 25 was based on the last available data which found a 17% uptake among young women since the vaccine became available. Distribution of each modelled health state by age within the population was based on the results of the simulation of a cohort of 14-year-old women. Health-state distribution in the generated cohort at each age is presented in the figure below.

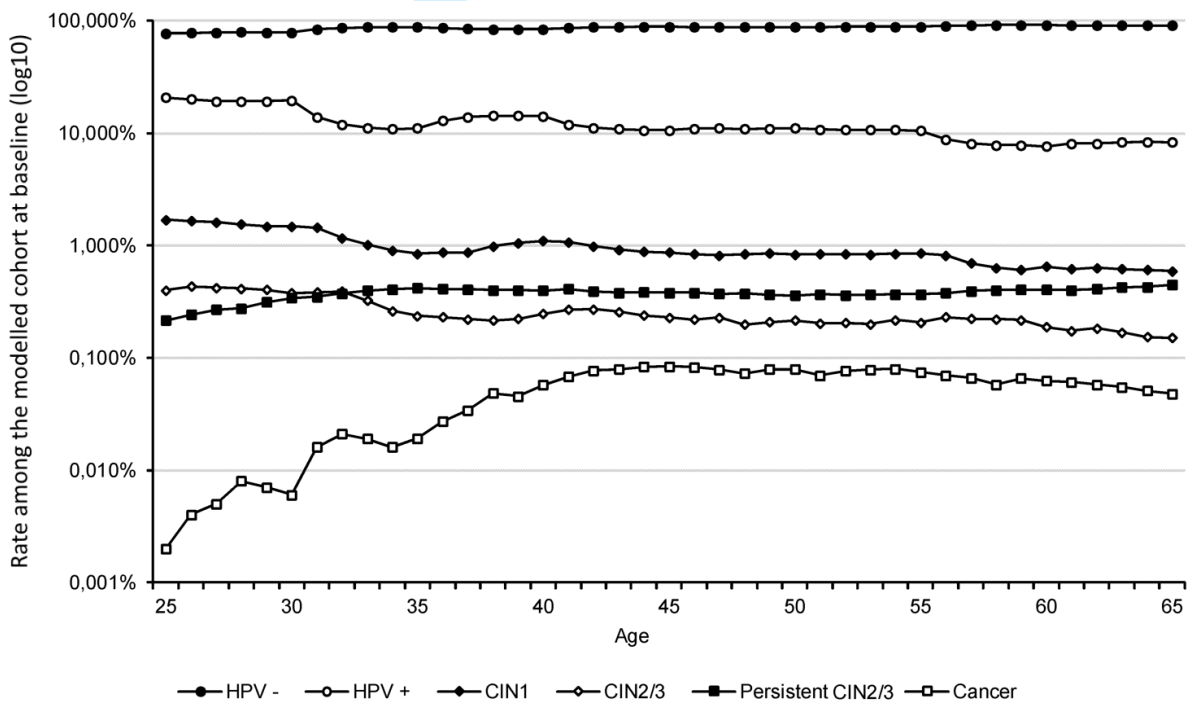

In scenarios based on Pap-test and p16/Ki67, IndScr participation is determined based on the analysis of a sample of the SHI general regimen: at 4 years, 61.9 % of eligible women were found to be participants. At patient generation, a relative risk (RR) of participation is applied to account for the impact of age and universal complementary health insurance (CMU-c). Another analysis of the same dataset provided the observed period between two IndScr (annual to every 10 years, see Supplementary file 3).

Each woman is associated with a SI participation status (Yes/No) and a screening period. Age-dependent probabilities of becoming NP are applied throughout the simulation to account for the lesser participation among older women. These probabilities are determined as follows:

$$P_{become\ non-participant} = (RR_{next\ age-group} / RR_{current\ age-group}) / 5$$

### Transition probabilities

High risk (HR) HPV annual infection rate was estimated to vary from 3.5% and 14% depending on age, in order to fit with the observed HR-HPV prevalence, considering a 50% annual viral clearance rate, according to the model developed by Demarteau *et al.* In younger women, vaccination is modelled through the application of a relative risk of infection taking into account the vaccination rate and decreased infection risk among vaccinated women.



Annual transition probabilities that determine the odds of progression from HPV infection to persistent CIN2/3 precancerous lesion are replicated from the model developed by Demarteau *et al.* and presented in table 2.

Considering the lack of appropriate data, the age-specific progression transition probability of persistent CIN2/3 to FIGO I CC was estimated by calibrating the model to the CC incidence data available. The calibration process consisted in the simulation of a cohort of 14-year-old women, taking the observed IndScr participation rate into account. Transition probabilities were adjusted within a plausible interval in order to duplicate the observed incidence of CC by age. The following figures respectively present the results of the calibration process and the resulting persistent CIN 2/3 to FIGO I CC transition probabilities by age.

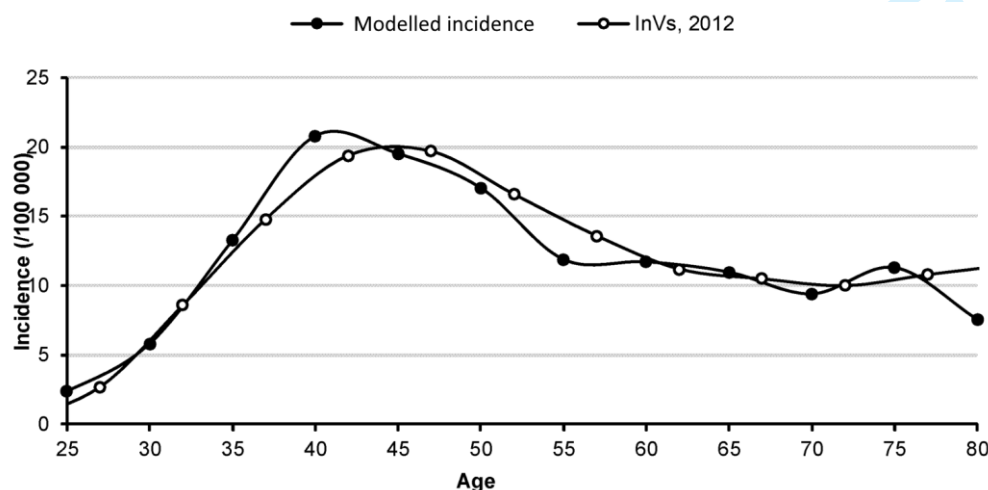



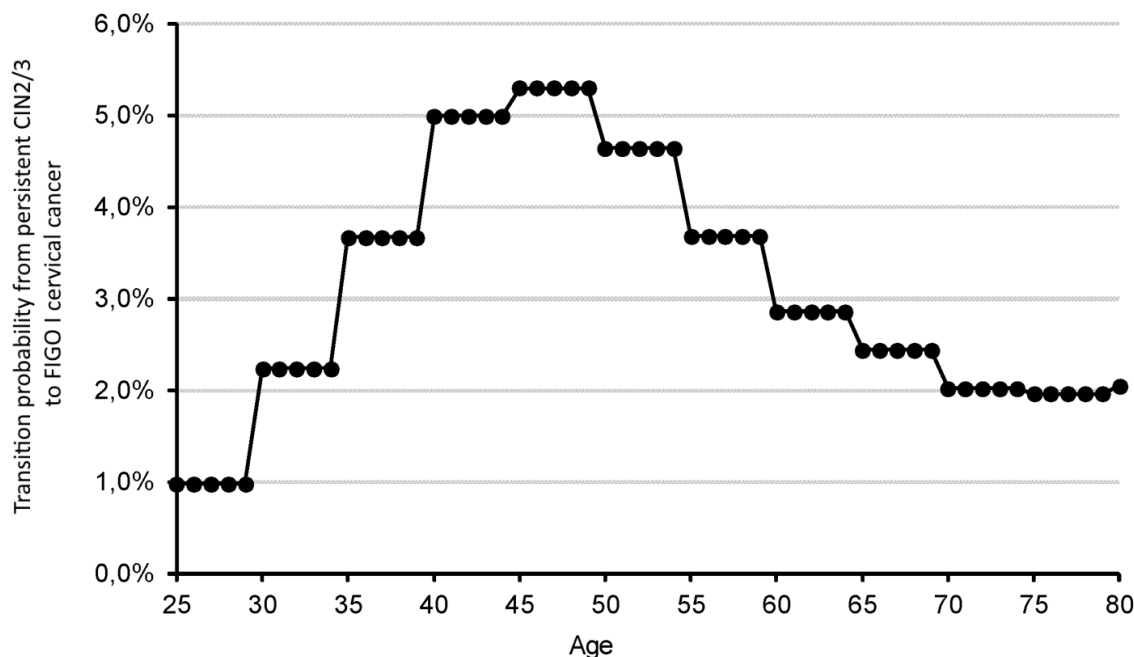

Probabilities of cancer progression and symptom emergence were obtained from the natural history of CC simulation model developed by Myers *et al.*

Cancer mortality by cancer grade and time since diagnosis were obtained from the study by Wright *et al.* based on the estimation of survival among 46,932 women with CC diagnosed from 1983-2009 and recorded in the Surveillance, Epidemiology, and End Results (SEER) database. Survival data for white women under 50 were selected, as mortality by causes other than CC seems unlikely in women under 50. General mortality is modelled according to French national statistics office (INSEE) data.

### Screening

OS participation rates after receiving an invitation or recall are based on the results of local OS experimentations carried out in different regions. The weighted averages of the participation rate upon receiving a mailed invitation or recall letter by the number of Pap-tests performed during each experimentation were respectively found to be 17.3% and 12.1%. Screening test sensitivity and specificity are given in the following table.

| Screening test                   | Sensitivity              | Specificity              | Source          |
|----------------------------------|--------------------------|--------------------------|-----------------|
| Primary Pap-test                 | 70.0 % (57.0 % - 80.0 %) | 95.0 % (92.0 % - 97.0 %) | Mustafa (2015)  |
| Confirmation Pap-test after HPV+ | 85.9 % (76.6 % - 92.1 %) | 65.9 % (63.1 % - 68.6 %) | Bergeron (2015) |
| Primary HPV-test                 | 94.0 % (89.0 % - 97.0 %) | 90.0 % (86.0 % - 93.0 %) | Mustafa (2015)  |
| Confirmation HPV-test after Pap+ | 100.0 % (NR)             | 61.1 % (NR)              | Mayrand (2007)  |
| P16/Ki67                         | 86.7 % (81.1 % - 90.9 %) | 95.2 % (94.9 % - 95.4 %) | Ikenberg (2013) |
| Colposcopy                       | 100.0% (NA)              | 100.0% (NA)              | Assumption      |

At each screening cycle, test performances determine whether women with lesions are screened positive or not depending on their current health state.

Pap-test and p16/Ki67 specificity and specificity are relative to the detection of CIN2/3 and more severe lesions. Women with negative results exit screening, positive results lead to the random draw of an observed lesion type based on the results of the OS experimentation led in the Alsace region (Supplementary file 4).

The action that follows each type of result is then randomly drawn according to the screening algorithms and the results of the OS experimentation led in Alsace. Based on the probabilities reported in Supplementary file 5, the different types of results can lead to further confirmation tests or conisation. Some women become lost to follow-up and exit screening.

|        | Confirmation<br>Pap-test | Confirmation<br>HPV-test | Colposcopy | Conization | Lost to follow-up |
|--------|--------------------------|--------------------------|------------|------------|-------------------|
| ASCUS  | 36,9 %                   | 10,8 %                   | 23,9 %     | 1,3 %      | 27,1 %            |
| ASC    | 36,3 %                   | 0,0 %                    | 48,8 %     | 7,1 %      | 7,8 %             |
| AC     | 6,5 %                    | 0,0 %                    | 30,7 %     | 7,0 %      | 55,9 %            |
| LSIL   | 36,2 %                   | 0,0 %                    | 32,0 %     | 3,5 %      | 28,3 %            |
| HSIL   | 21,4 %                   | 0,0 %                    | 50,1 %     | 19,1 %     | 9,4 %             |
| Cancer | 10,0 %                   | 0,0 %                    | 85,0 %     | 5,0 %      | 0,0 %             |

In order to take the impact of the screening organization structures into account, OS implementation leads to reduced odds of becoming lost to follow-up after a positive result for both OS and IndScr participants. Based on the Alsace and Indre-et-Loire regional OS experimentation results, a 0.77 RR of becoming lost to follow-up is applied.

Colposcopy is associated with 100% sensitivity and specificity. Therefore, colposcopy results are negative in HPV- and HPV+ women and positive in women with CIN1, CIN2/3 and persistent CIN2/3 lesions. Women with CIN1 proceed to a particular screening algorithm based on recommendations by the French national scientific society of obstetricians and gynaecologists (CNGOF).

HPV-tests and specificity are relative to the detection of HPV+ and more severe lesions. Women with negative results exit screening, positive results lead to a confirmation Pap-test (or p16/Ki67) followed by a colposcopy in case of a new positive result. If negative, a new round of HPV and Pap-tests are performed concomitantly after one year: a positive result for either of them (or both) leads to colposcopy; women with negative-only results exit screening.

Rates of lost to follow-up observed during the START-HPV experimentation (Ardennes region) were used. The lost to follow-up rate after positive confirmation Pap-tests was estimated by subtracting the latter from the average rate of lost to follow-up in HPV+ women observed in the Alsace region OS experimentation (27.7%). Similarly to Pap-based screening, a 0.77 RR of being lost to follow-up is applied in OS-participant women.

| Lost to follow-up after        | Probability | Source                                         |
|--------------------------------|-------------|------------------------------------------------|
| Positive HPV-test              | 19,4 %      | START-HPV, Ardennes                            |
| Positive confirmation pap-test | 8,3 %       | START-HPV, Ardennes, Alsace OS experimentation |

All samples have odds of being unreadable, depending on the nature of the sample. Women with unreadable samples perform a new test.

A 95% efficacy was considered for conisation. Women with successful conisation go back to the HPV-state. In case of failure, women leave screening in their current state.

Supplementary File 4 Individual screening participation and periodicity data

| Individual screening frequency | Distribution |
|--------------------------------|--------------|
| Annual                         | 5,9%         |
| 2 years                        | 21,5%        |
| 3 years                        | 18,7%        |
| 4 years                        | 8,6%         |
| 5 years                        | 4,3%         |
| 6 years                        | 2,8%         |
| 7 years                        | 1,8%         |
| 8 years                        | 1,1%         |
| 9 years                        | 0,7%         |
| 10 years                       | 0,5%         |

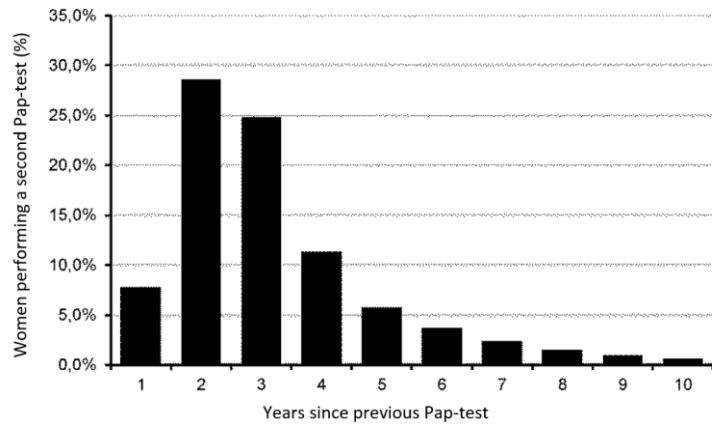

| Population                                                   | RR of participating vs. average | Source                                          |
|--------------------------------------------------------------|---------------------------------|-------------------------------------------------|
| <b>Age</b>                                                   |                                 |                                                 |
| 25 – 30                                                      | 1,06                            | National health insurance database <sup>3</sup> |
| 30 – 35                                                      | 1,08                            | National health insurance database <sup>3</sup> |
| 35 – 40                                                      | 1,07                            | National health insurance database <sup>3</sup> |
| 40 – 45                                                      | 1,04                            | National health insurance database <sup>3</sup> |
| 50 – 55                                                      | 0,92                            | National health insurance database <sup>3</sup> |
| 55 – 60                                                      | 0,82                            | National health insurance database <sup>3</sup> |
| 60 – 65                                                      | 0,77                            | National health insurance database <sup>3</sup> |
| <b>Universal complementary health insurance registration</b> |                                 |                                                 |
| Yes                                                          | 0,80                            | National health insurance database <sup>3</sup> |
| No                                                           | 1,03                            | National health insurance database <sup>3</sup> |

Each woman is associated with an IndScr participation status (Yes/No) and a screening period. Age-dependent probabilities of becoming NP are applied throughout the simulation to account for the lesser participation among older women. These probabilities are determined as follows:

$$P_{become\ non-participant} = (RR_{next\ age-group} / RR_{current\ age-group}) / 5$$

### Supplementary File 5 Model validation results

The model faithfully reproduces cancer incidence, however the modelled CC mortality was slightly higher than observed data, although differences were systematically inferior to 4 per 100,000.



only

## Supplementary File 6 Cost-utility analysis - specific inputs and results

| State                                  | Utility/Utility decrement | Source          |
|----------------------------------------|---------------------------|-----------------|
| Age 18-29                              | 0.86                      | Perneger, 2010  |
| Age 30-39                              | 0.86                      |                 |
| Age 40-49                              | 0.84                      |                 |
| Age 50-59                              | 0.81                      |                 |
| Age 60-69                              | 0.8                       |                 |
| Age 70-79                              | 0.76                      |                 |
| Age 80+                                | 0.74                      |                 |
| Diagnosed CIN1                         | -0.01                     | Demarteau, 2011 |
| Diagnosed CIN2/3                       | -0.01                     |                 |
| Cervical Cancer (1 <sup>st</sup> year) | -0.27                     |                 |
| Cervical Cancer (thereafter)           | -0.06                     | Korfage, 2009   |

| Scénario        | QALY   | Total cost (K€) | ICER (€/LY) vs current | Frontier       |
|-----------------|--------|-----------------|------------------------|----------------|
| IndScr only*    | 16.4   | 122.6           | Reference              | Dominated      |
| Pap/Pap-HPV     | +9.54  | +22.3           | 23,392                 | Dominated      |
| Pap/p16Ki67     | +11.18 | +25.5           | 22,891                 | Dominated      |
| HPV/Pap-3y      | +14.99 | +55.8           | 37,290                 | Dominated      |
| HPV/Pap-5y      | +14.76 | -13.3           | Dominant               | Ext. Dominated |
| HPV/Pap-10y     | +9.44  | -73.4           | Dominant               | Reference      |
| HPV/p16Ki67-5y  | +17.06 | +3.79           | 2,222                  | 131,965        |
| HPV/p16Ki67-10y | +11.88 | -64.6           | Dominant               | 36,468         |
| p16Ki67/p16Ki67 | +17.53 | +160.7          | 91,703                 | 3,302,932      |

\*Reference for other scenarios. Extra-QALY per 10,000 women eligible for OS on a lifetime horizon. QALY: Quality Adjusted Life Years

## Table

Table 1 | CHEERS checklist—Items to include when reporting economic evaluations of health interventions

| Section/item                                           | Item No | Recommendation                                                                                                                                                                                                                                                                                                                                        | Reported on page No/line No |
|--------------------------------------------------------|---------|-------------------------------------------------------------------------------------------------------------------------------------------------------------------------------------------------------------------------------------------------------------------------------------------------------------------------------------------------------|-----------------------------|
| <b>Title and abstract</b>                              |         |                                                                                                                                                                                                                                                                                                                                                       |                             |
| Title                                                  | 1       | Identify the study as an economic evaluation or use more specific terms such as “cost-effectiveness analysis”, and describe the interventions compared.                                                                                                                                                                                               | 1                           |
| Abstract                                               | 2       | Provide a structured summary of objectives, perspective, setting, methods (including study design and inputs), results (including base case and uncertainty analyses), and conclusions.                                                                                                                                                               | 2                           |
| <b>Introduction</b>                                    |         |                                                                                                                                                                                                                                                                                                                                                       |                             |
| Background and objectives                              | 3       | Provide an explicit statement of the broader context for the study.                                                                                                                                                                                                                                                                                   | 3                           |
|                                                        |         | Present the study question and its relevance for health policy or practice decisions.                                                                                                                                                                                                                                                                 | 3/28 - 29                   |
| <b>Methods</b>                                         |         |                                                                                                                                                                                                                                                                                                                                                       |                             |
| Target population and subgroups                        | 4       | Describe characteristics of the base case population and subgroups analysed, including why they were chosen.                                                                                                                                                                                                                                          | Table 2, 6/12 - 18          |
| Setting and location                                   | 5       | State relevant aspects of the system(s) in which the decision(s) need(s) to be made.                                                                                                                                                                                                                                                                  | 4                           |
| Study perspective                                      | 6       | Describe the perspective of the study and relate this to the costs being evaluated.                                                                                                                                                                                                                                                                   | 6/36 - 37                   |
| Comparators                                            | 7       | Describe the interventions or strategies being compared and state why they were chosen.                                                                                                                                                                                                                                                               | Table 1, 4/2 - 20           |
| Time horizon                                           | 8       | State the time horizon(s) over which costs and consequences are being evaluated and say why appropriate.                                                                                                                                                                                                                                              | 5/27 - 28                   |
| Discount rate                                          | 9       | Report the choice of discount rate(s) used for costs and outcomes and say why appropriate.                                                                                                                                                                                                                                                            | 9/6 - 7                     |
| Choice of health outcomes                              | 10      | Describe what outcomes were used as the measure(s) of benefit in the evaluation and their relevance for the type of analysis performed.                                                                                                                                                                                                               | 9/6 - 7                     |
| Measurement of effectiveness                           | 11a     | <i>Single study-based estimates:</i> Describe fully the design features of the single effectiveness study and why the single study was a sufficient source of clinical effectiveness data.                                                                                                                                                            |                             |
|                                                        | 11b     | <i>Synthesis-based estimates:</i> Describe fully the methods used for identification of included studies and synthesis of clinical effectiveness data.                                                                                                                                                                                                | NA                          |
| Measurement and valuation of preference based outcomes | 12      | If applicable, describe the population and methods used to elicit preferences for outcomes.                                                                                                                                                                                                                                                           | NA                          |
| Estimating resources and costs                         | 13a     | <i>Single study-based economic evaluation:</i> Describe approaches used to estimate resource use associated with the alternative interventions. Describe primary or secondary research methods for valuing each resource item in terms of its unit cost. Describe any adjustments made to approximate to opportunity costs.                           |                             |
|                                                        | 13b     | <i>Model-based economic evaluation:</i> Describe approaches and data sources used to estimate resource use associated with model health states. Describe primary or secondary research methods for valuing each resource item in terms of its unit cost. Describe any adjustments made to approximate to opportunity costs.                           | 6/36 - 7/3                  |
| Currency, price date, and conversion                   | 14      | Report the dates of the estimated resource quantities and unit costs. Describe methods for adjusting estimated unit costs to the year of reported costs if necessary. Describe methods for converting costs into a common currency base and the exchange rate.                                                                                        | 7/2 - 3                     |
| Choice of model                                        | 15      | Describe and give reasons for the specific type of decision-analytical model used. Providing a figure to show model structure is strongly recommended.                                                                                                                                                                                                | Figure 1, 5/23 - 26         |
| Assumptions                                            | 16      | Describe all structural or other assumptions underpinning the decision-analytical model.                                                                                                                                                                                                                                                              | Table 2, 5/29 - 7/3         |
| Analytical methods                                     | 17      | Describe all analytical methods supporting the evaluation. This could include methods for dealing with skewed, missing, or censored data; extrapolation methods; methods for pooling data; approaches to validate or make adjustments (such as half cycle corrections) to a model; and methods for handling population heterogeneity and uncertainty. | 8/6 - 12                    |
| <b>Results</b>                                         |         |                                                                                                                                                                                                                                                                                                                                                       |                             |
| Study parameters                                       | 18      | Report the values, ranges, references, and, if used, probability distributions for all parameters. Report reasons or sources for distributions used to represent uncertainty where appropriate. Providing a table to show the input values is strongly recommended.                                                                                   | Table 2, 6/11 - 7/3         |
| Incremental costs and outcomes                         | 19      | For each intervention, report mean values for the main categories of estimated costs and outcomes of interest, as well as mean differences between the comparator groups. If applicable, report incremental cost-effectiveness ratios.                                                                                                                | Tables 3 & 4                |
| Characterising uncertainty                             | 20a     | <i>Single study-based economic evaluation:</i> Describe the effects of sampling uncertainty for the estimated incremental cost and incremental effectiveness parameters, together with the impact of methodological assumptions (such as discount rate, study perspective).                                                                           |                             |

RESEARCH METHODS & REPORTING

(continued)

| Section/item                                                                                                     | Item No | Recommendation                                                                                                                                                                                                                                                             | Reported on page No/line No |
|------------------------------------------------------------------------------------------------------------------|---------|----------------------------------------------------------------------------------------------------------------------------------------------------------------------------------------------------------------------------------------------------------------------------|-----------------------------|
|                                                                                                                  | 20b     | <i>Model-based economic evaluation:</i> Describe the effects on the results of uncertainty for all input parameters, and uncertainty related to the structure of the model and assumptions.                                                                                | Figures 3 & 4               |
| Characterising heterogeneity                                                                                     | 21      | If applicable, report differences in costs, outcomes, or cost-effectiveness that can be explained by variations between subgroups of patients with different baseline characteristics or other observed variability in effects that are not reducible by more information. | Figures 3 & 4; 11/24 - 35   |
| <b>Discussion</b>                                                                                                |         |                                                                                                                                                                                                                                                                            |                             |
| Study findings, limitations, generalisability, and current knowledge                                             | 22      | Summarise key study findings and describe how they support the conclusions reached. Discuss limitations and the generalisability of the findings and how the findings fit with current knowledge.                                                                          | 12 & 13                     |
| <b>Other</b>                                                                                                     |         |                                                                                                                                                                                                                                                                            |                             |
| Source of funding                                                                                                | 23      | Describe how the study was funded and the role of the funder in the identification, design, conduct, and reporting of the analysis. Describe other non-monetary sources of support.                                                                                        | 1                           |
| Conflicts of interest                                                                                            | 24      | Describe any potential for conflict of interest of study contributors in accordance with journal policy. In the absence of a journal policy, we recommend authors comply with International Committee of Medical Journal Editors recommendations.                          | None                        |
| For consistency, the CHEERS statement checklist format is based on the format of the CONSORT statement checklist |         |                                                                                                                                                                                                                                                                            |                             |

For peer review only

1  
2  
3  
4  
5  
6  
7  
8  
9  
10  
11  
12  
13  
14  
15  
16  
17  
18  
19  
20  
21  
22  
23  
24  
25  
26  
27  
28  
29  
30  
31  
32  
33  
34  
35  
36  
37  
38  
39  
40  
41  
42  
43  
44  
45  
46  
47  
48  
49  
50  
51  
52  
53  
54  
55  
56  
57  
58  
59  
60
