# Supplementary material for: Organised screening for cervical cancer in France: a cost-effectiveness assessment
Source: PubMed Central journal article supplement — BMJ Open. 2017 Oct 6;7(10):e014626. doi: 10.1136/bmjopen-2016-014626 (PMC5640017; doi:10.1136/bmjopen-2016-014626), 2017-10-06
Supplement: bmjopen-2016-014626supp002.pdf [file bmjopen-2016-014626supp002.pdf]

## Supplementary File 2 Pap-test results depending on HPV infection or lesion type

|                     | ASCUS  | ASC   | AC    | LSIL   | HSIL   | Cancer |
|---------------------|--------|-------|-------|--------|--------|--------|
| HPV-                | 53.5%  | 1.5%  | 2.7%  | 40.1%  | 2.3%   | 0.0%   |
| HPV+                | 53.5%  | 1.5%  | 2.7%  | 40.1%  | 2.3%   | 0.0%   |
| CIN1                | 53.5 % | 1.5 % | 2.7 % | 40.1 % | 2.3 %  | 0.0 %  |
| CIN2/3              | 26.2 % | 6.0 % | 9.6 % | 32.4 % | 23.2 % | 2.6 %  |
| Cancer (all stages) | 0.0%   | 0.0%  | 0.0%  | 0.0%   | 0.0%   | 100.0% |

## Follow-up of positive Pap-test, by Pap-test result

|        | Confirmation<br>Pap-test | Confirmation<br>HPV-test | Colposcopy | Conization | Lost to follow-up |
|--------|--------------------------|--------------------------|------------|------------|-------------------|
| ASCUS  | 36,9 %                   | 10,8 %                   | 23,9 %     | 1,3 %      | 27,1 %            |
| ASC    | 36,3 %                   | 0,0 %                    | 48,8 %     | 7,1 %      | 7,8 %             |
| AC     | 6,5 %                    | 0,0 %                    | 30,7 %     | 7,0 %      | 55,9 %            |
| LSIL   | 36,2 %                   | 0,0 %                    | 32,0 %     | 3,5 %      | 28,3 %            |
| HSIL   | 21,4 %                   | 0,0 %                    | 50,1 %     | 19,1 %     | 9,4 %             |
| Cancer | 10,0 %                   | 0,0 %                    | 85,0 %     | 5,0 %      | 0,0 %             |
