# Supplementary material for: Organised screening for cervical cancer in France: a cost-effectiveness assessment
Source: PubMed Central journal article supplement — BMJ Open. 2017 Oct 6;7(10):e014626. doi: 10.1136/bmjopen-2016-014626 (PMC5640017; doi:10.1136/bmjopen-2016-014626), 2017-10-06
Supplement: bmjopen-2016-014626supp004.pdf [file bmjopen-2016-014626supp004.pdf]

## Supplementary File 4 Individual screening participation and periodicity data

| Individual screening frequency | Distribution |
|--------------------------------|--------------|
| Annual                         | 5,9%         |
| 2 years                        | 21,5%        |
| 3 years                        | 18,7%        |
| 4 years                        | 8,6%         |
| 5 years                        | 4,3%         |
| 6 years                        | 2,8%         |
| 7 years                        | 1,8%         |
| 8 years                        | 1,1%         |
| 9 years                        | 0,7%         |
| 10 years                       | 0,5%         |

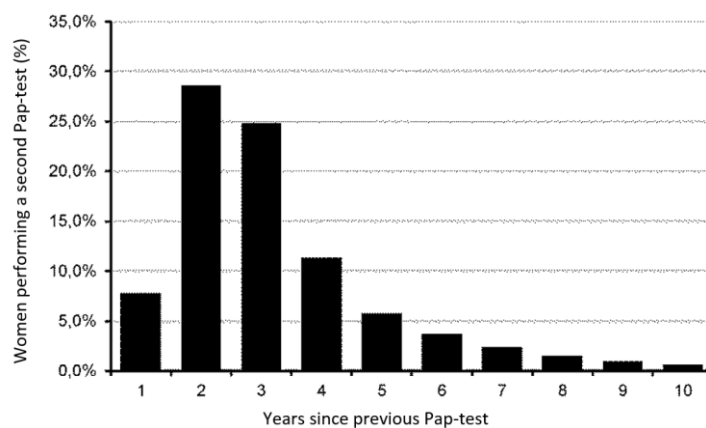

| Population                                                   | RR of participating vs. average | Source                                          |
|--------------------------------------------------------------|---------------------------------|-------------------------------------------------|
| <b>Age</b>                                                   |                                 |                                                 |
| 25 – 30                                                      | 1,06                            | National health insurance database <sup>3</sup> |
| 30 – 35                                                      | 1,08                            | National health insurance database <sup>3</sup> |
| 35 – 40                                                      | 1,07                            | National health insurance database <sup>3</sup> |
| 40 – 45                                                      | 1,04                            | National health insurance database <sup>3</sup> |
| 50 – 55                                                      | 0,92                            | National health insurance database <sup>3</sup> |
| 55 – 60                                                      | 0,82                            | National health insurance database <sup>3</sup> |
| 60 – 65                                                      | 0,77                            | National health insurance database <sup>3</sup> |
| <b>Universal complementary health insurance registration</b> |                                 |                                                 |
| Yes                                                          | 0,80                            | National health insurance database <sup>3</sup> |
| No                                                           | 1,03                            | National health insurance database <sup>3</sup> |

Each woman is associated with an IndScr participation status (Yes/No) and a screening period. Age-dependent probabilities of becoming NP are applied throughout the simulation to account for the lesser participation among older women. These probabilities are determined as follows:

$$P_{become\ non-participant} = (RR_{next\ age-group} / RR_{current\ age-group}) / 5$$
