# Supplementary material for: Organised screening for cervical cancer in France: a cost-effectiveness assessment
Source: PubMed Central journal article supplement — BMJ Open. 2017 Oct 6;7(10):e014626. doi: 10.1136/bmjopen-2016-014626 (PMC5640017; doi:10.1136/bmjopen-2016-014626), 2017-10-06

## Supplementary File 5 Model validation results

The model faithfully reproduces cancer incidence, however the modelled CC mortality was slightly higher than observed data, although differences were systematically inferior to 4 per 100,000.

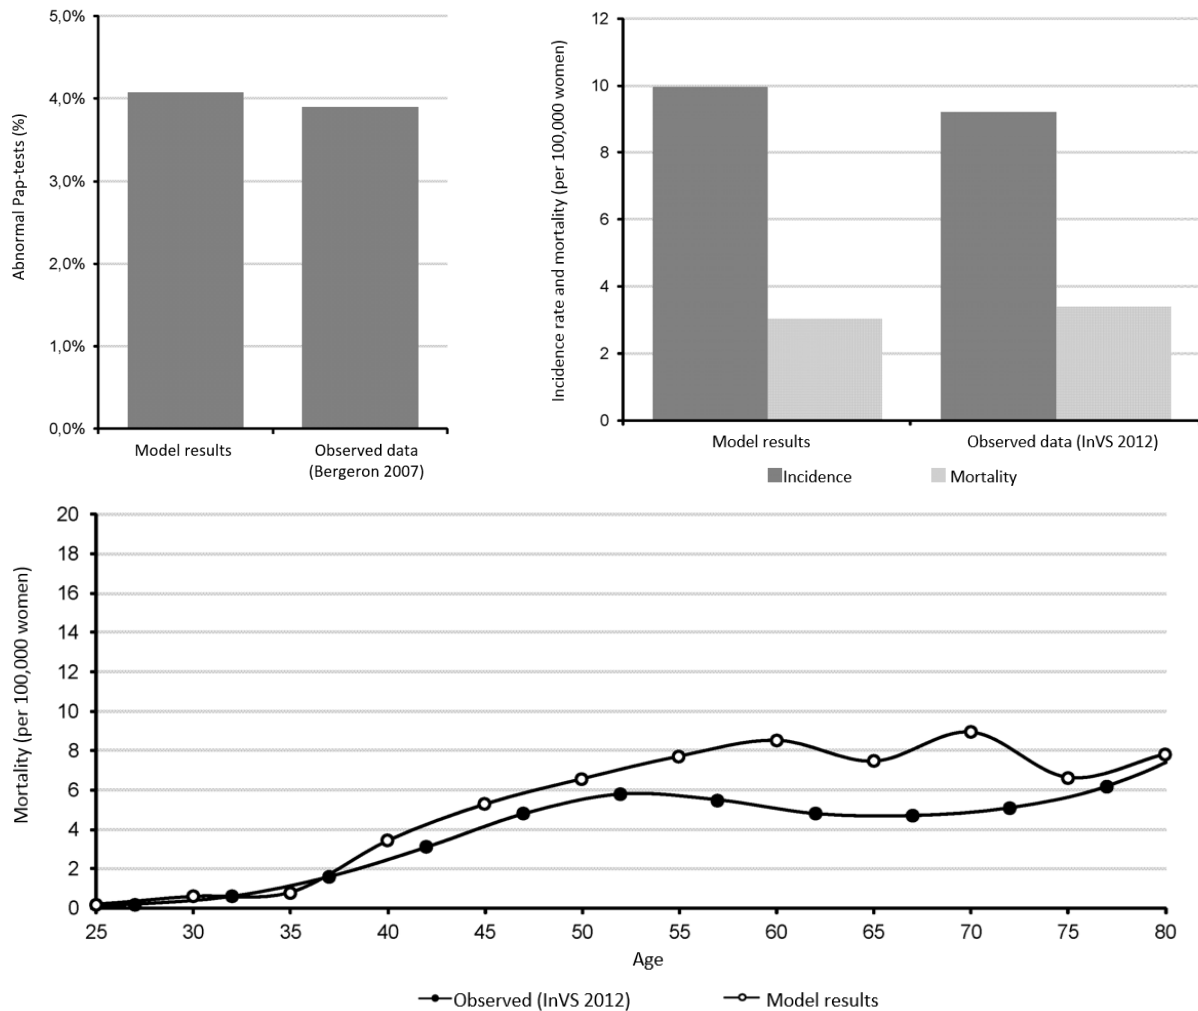

Supplement: bmjopen-2016-014626supp005.pdf [file bmjopen-2016-014626supp005.pdf]
