# Supplementary material for: Organised screening for cervical cancer in France: a cost-effectiveness assessment
Source: PubMed Central journal article supplement — BMJ Open. 2017 Oct 6;7(10):e014626. doi: 10.1136/bmjopen-2016-014626 (PMC5640017; doi:10.1136/bmjopen-2016-014626), 2017-10-06
Supplement: bmjopen-2016-014626supp006.pdf [file bmjopen-2016-014626supp006.pdf]

## Supplementary File 6 Cost-utility analysis - specific inputs and results

| State                                  | Utility/Utility decrement | Source          |
|----------------------------------------|---------------------------|-----------------|
| Age 18-29                              | 0.86                      | Perneger, 2010  |
| Age 30-39                              | 0.86                      |                 |
| Age 40-49                              | 0.84                      |                 |
| Age 50-59                              | 0.81                      |                 |
| Age 60-69                              | 0.8                       |                 |
| Age 70-79                              | 0.76                      |                 |
| Age 80+                                | 0.74                      |                 |
| Diagnosed CIN1                         | -0.01                     | Demarteau, 2011 |
| Diagnosed CIN2/3                       | -0.01                     |                 |
| Cervical Cancer (1 <sup>st</sup> year) | -0.27                     | Korfage, 2009   |
| Cervical Cancer (thereafter)           | -0.06                     |                 |

| Scénario        | QALY   | Total cost (K€) | ICER (€/LY) vs current | Frontier       |
|-----------------|--------|-----------------|------------------------|----------------|
| IndScr only*    | 16.4   | 122.6           | Reference              | Dominated      |
| Pap/Pap-HPV     | +9.54  | +22.3           | 23,392                 | Dominated      |
| Pap/p16Ki67     | +11.18 | +25.5           | 22,891                 | Dominated      |
| HPV/Pap-3y      | +14.99 | +55.8           | 37,290                 | Dominated      |
| HPV/Pap-5y      | +14.76 | -13.3           | Dominant               | Ext. Dominated |
| HPV/Pap-10y     | +9.44  | -73.4           | Dominant               | Reference      |
| HPV/p16Ki67-5y  | +17.06 | +3.79           | 2,222                  | 131,965        |
| HPV/p16Ki67-10y | +11.88 | -64.6           | Dominant               | 36,468         |
| p16Ki67/p16Ki67 | +17.53 | +160.7          | 91,703                 | 3,302,932      |

\*Reference for other scenarios. Extra-QALY per 10,000 women eligible for OS on a lifetime horizon. QALY: Quality Adjusted Life Years
