# Supplementary figures and images for: Organised screening for cervical cancer in France: a cost-effectiveness assessment
Source: PubMed Central journal article supplement — BMJ Open. 2017 Oct 6;7(10):e014626. doi: 10.1136/bmjopen-2016-014626 (PMC5640017; doi:10.1136/bmjopen-2016-014626), 2017-10-06

# Supplementary File 1 Screening algorithms

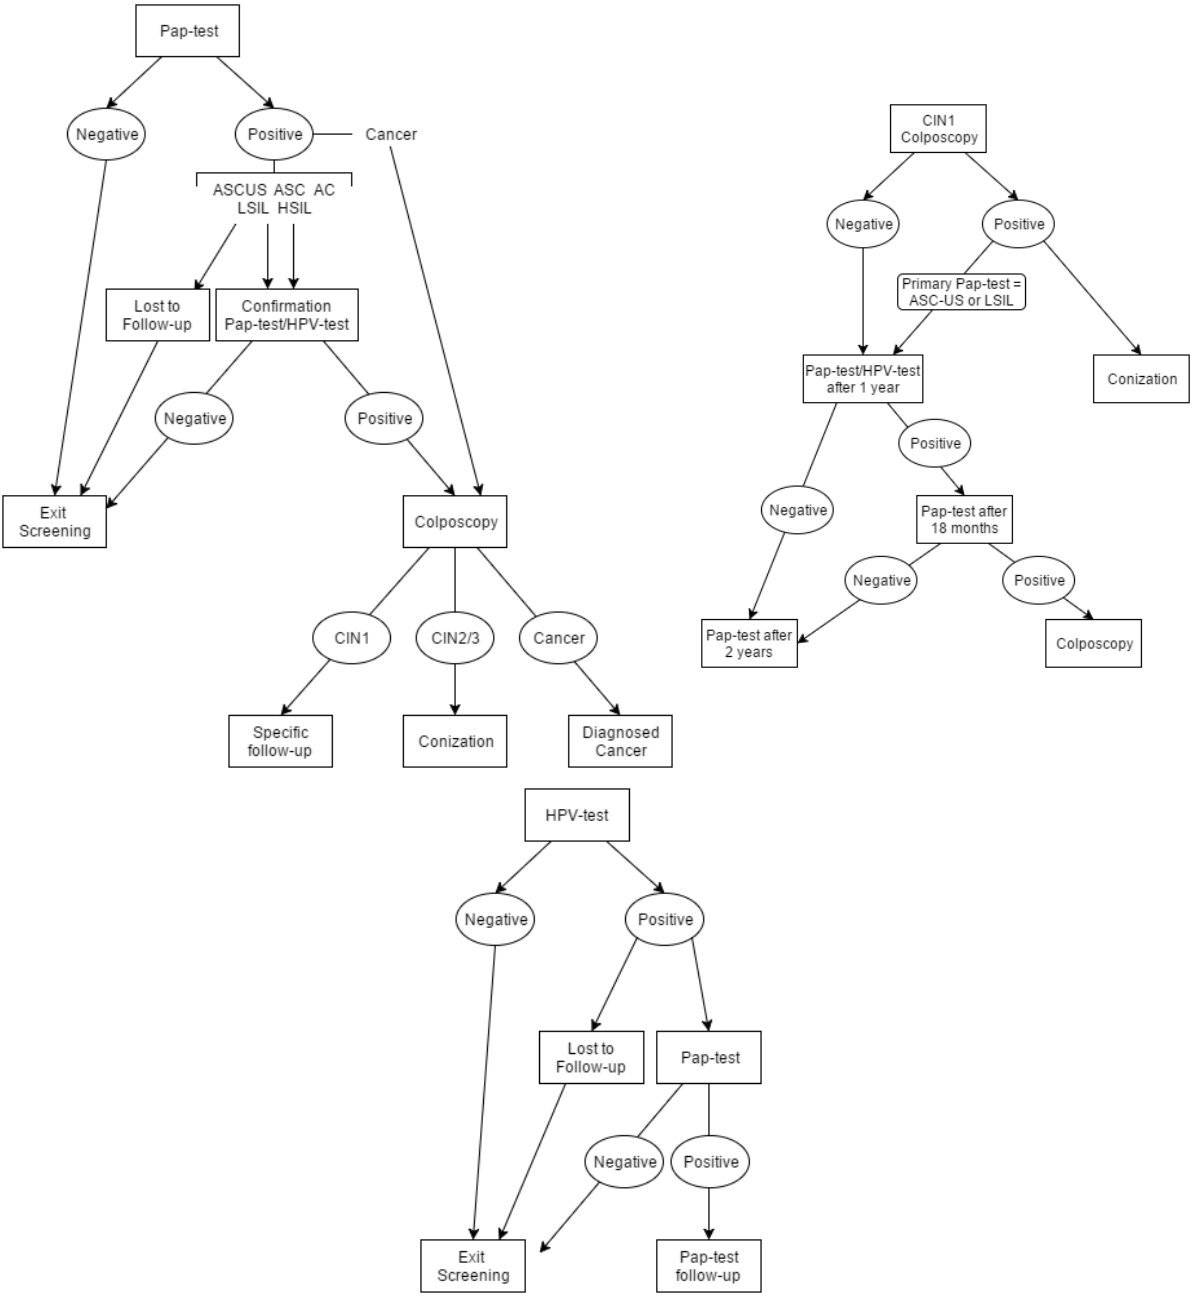

Supplement: bmjopen-2016-014626supp001.pdf [file bmjopen-2016-014626supp001.pdf]
